# Supplementary material
Source: MDPI journal article supplement (https://www.mdpi.com/2624-8549/1/1/7)
Supplement: s1 [file s1]

# Supplementary Information

## Hydroquinone-based Anion Receptors for Redox-Switchable Chloride Binding.

Daniel A. McNaughton<sup>1</sup>, Xiaochen Fu<sup>1</sup>, William Lewis<sup>1</sup>, Deanna M. D'Alessandro<sup>1</sup> and Philip A. Gale<sup>1,\*</sup>

<sup>1</sup> School of Chemistry (F11), The University of Sydney, Sydney, NSW 2006, Australia.

\* Correspondence: [philip.gale@sydney.edu.au](mailto:philip.gale@sydney.edu.au)

### 1. Characterisation Data

<sup>1</sup>H NMR and <sup>13</sup>C{<sup>1</sup>H} NMR shown for each compound. High resolution mass spectrometry (HR-MS) using ESI is displayed for all compounds aside from the quinone species – which were characterised with APCI.

#### 2,5-dimethoxybenzoyl chloride

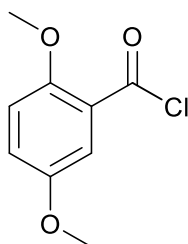

This compound was synthesised following a literature procedure [1]. 2,5-dimethoxybenzoic acid (1.00 g, 5.49 mmol) was dissolved in dry toluene (10 mL) and drops of DMF were added. The solution was stirred under N<sub>2</sub> atmosphere until all 2,5-dimethoxybenzoic acid had dissolved and was subsequently cooled to 0 °C in an ice bath. Following this, a portion of oxalyl chloride (0.732 g, 5.76 mmol) was added dropwise and the solution stirred at 0 °C for a further 30 minutes. The mixture was then stirred at room temperature for a further 2.5 hours before the solvent was removed on a rotary evaporator to leave a yellow oil (0.941 g, 4.69 mmol, 85%). <sup>1</sup>H NMR and mass spec were not obtained, as the product was used immediately for subsequent reactions.

## 2,5-dimethoxy-N-phenylbenzamide

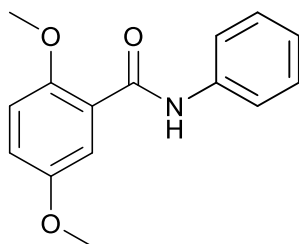

This compound was also synthesised following the same procedure [1]. 2,5-dimethoxybenzoyl chloride (1.00 g, 4.99 mmol) was dissolved in acetonitrile (18 mL) before a portion of  $\text{K}_2\text{CO}_3$  (0.800 g, 5.79 mmol) was added. Subsequently, aniline (0.464 g, 4.99 mmol) was added and the mixture left to stir at room temperature for 2 days. The solvent was removed on a rotary evaporator before the resultant solid was redissolved in EtOAc and washed with 1M NaOH solution. The solvent was again removed, and the solid recrystallised from diethyl ether to yield the product (0.634 g, 2.47 mmol, 50%). The NMR spectra were found to be consistent with literature spectra.

## 2,5-dimethoxy-N-(p-tolyl)benzamide

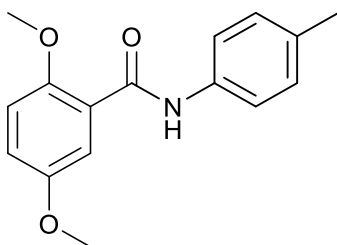

2,5-dimethoxybenzoyl chloride (0.941 g, 4.69 mmol) was dissolved in acetonitrile (20 mL) before a portion of  $\text{K}_2\text{CO}_3$  (0.840 g, 6.08 mmol) was added. Subsequently, p-toluidine (0.502 g, 4.69 mmol) was added and the mixture left to stir at room temperature for 2 days. The solvent was removed on a rotary evaporator before the resultant solid was redissolved in EtOAc and washed with 1M NaOH solution. The solvent was again removed to leave a brown oil, which recrystallised from ether to yield a yellowish-white product (0.488 g, 1.80 mmol, 38%).

**$^1\text{H}$  NMR** (400 MHz,  $\text{CDCl}_3$ -d)  $\delta$  ppm 10.06 (1 H, s), 7.62 (2 H, d, J 8.4), 7.23 (1 H, d, J 3.0), 7.14 (2H, d, J 8.5), 7.08 (2 H, d, J 3.0), 3.86 (3 H, s), 3.75 (3 H, s), 2.27 (3 H, s);  **$^{13}\text{C}\{^1\text{H}\}$  NMR** (101 MHz,  $\text{CDCl}_3$ -d)  $\delta$  ppm 162.8, 154.1, 151.5, 135.9, 133.8, 129.5, 122.4, 120.4, 119.8, 115.6, 113.3, 56.9, 55.8, 20.9.

**LR-MS** (ESI<sup>+</sup>)  $m/z$  294.16 [M + Na]<sup>+</sup>, 565.20 [2M + Na]<sup>+</sup>; **HR-MS** (ESI<sup>+</sup>) calcd for C<sub>16</sub>H<sub>17</sub>NO<sub>3</sub> [M+Na]<sup>+</sup>: 294.11061, found  $m/z$  294.11205

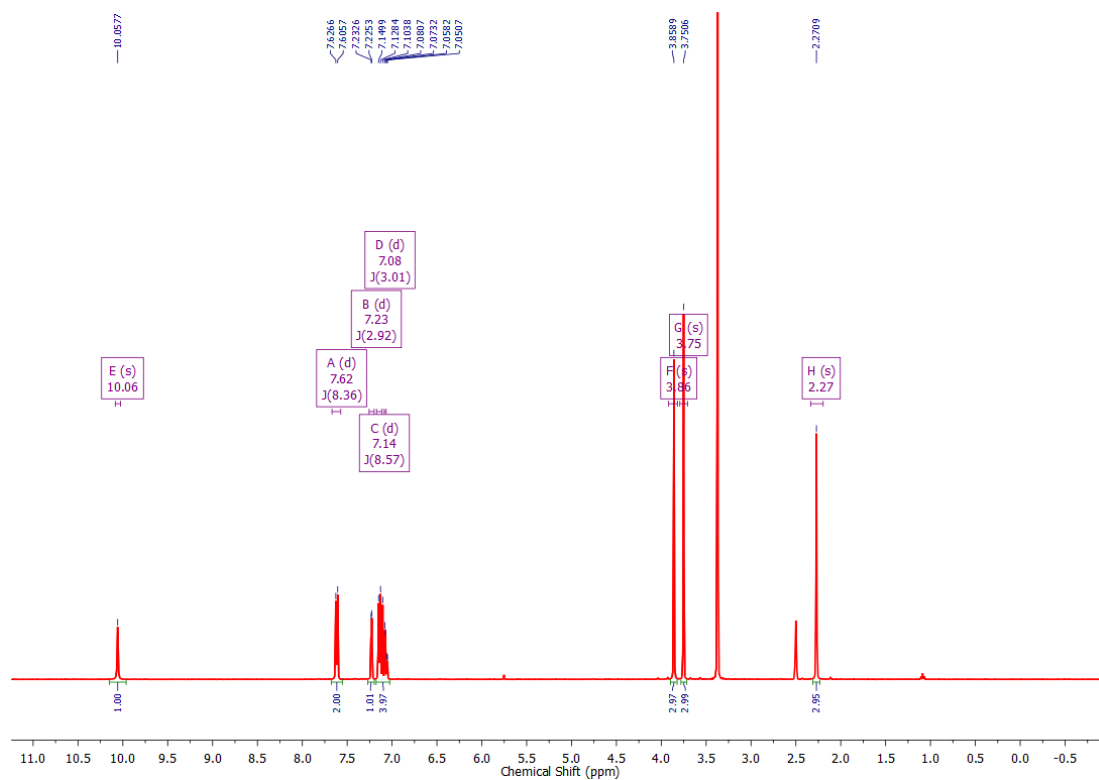

Figure 1. <sup>1</sup>H NMR (400 MHz) spectrum of 2,5-dimethoxy-N-(p-tolyl)benzamide in (CD<sub>3</sub>)<sub>2</sub>SO<sub>3</sub> at 298 K.

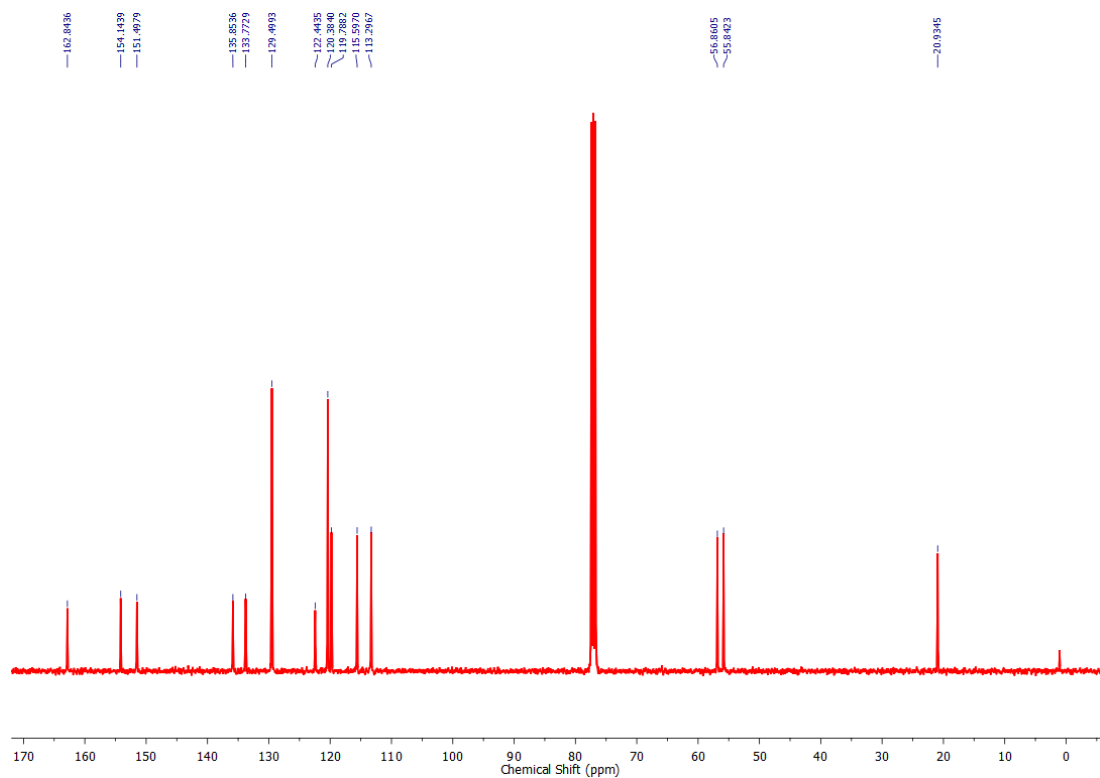

Figure 2.  $^{13}\text{C}\{^1\text{H}\}$  NMR (101 MHz) spectrum of 2,5-dimethoxy-N-(p-tolyl)benzamide in  $(\text{CD}_3)_2\text{SO}_3$  at 298 K.

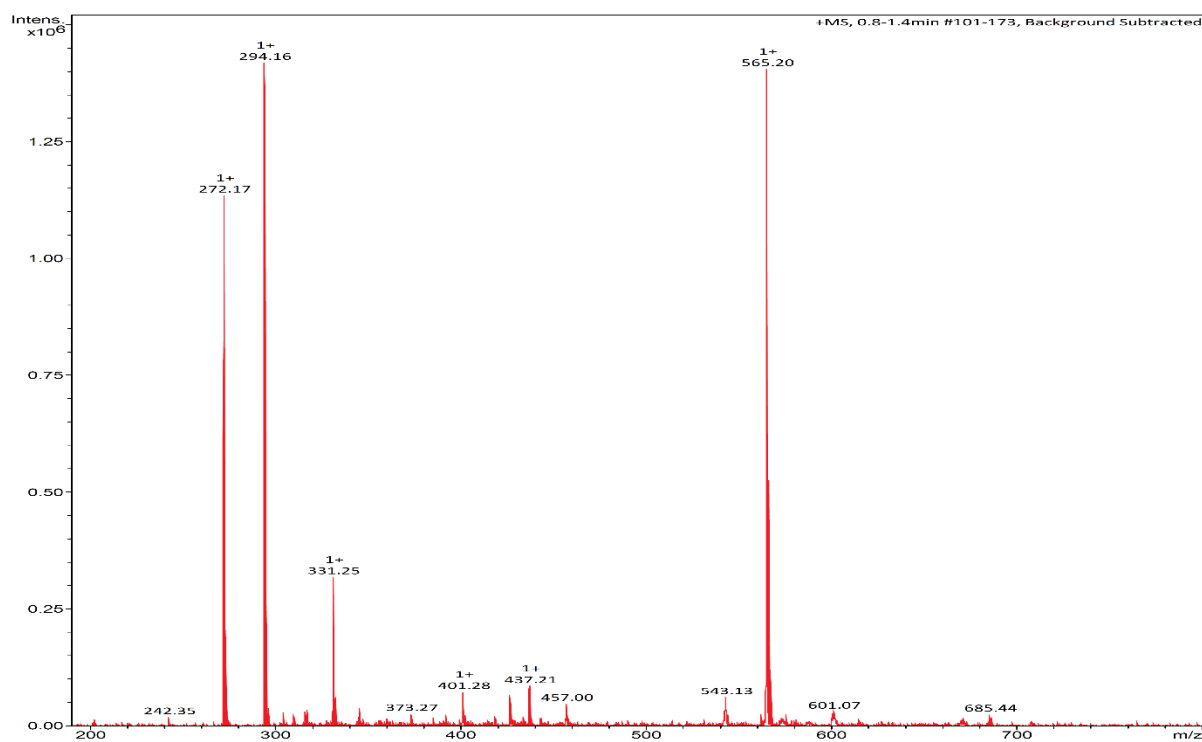

Figure 3. LR-MS ( $\text{ESI}^+$ ) of 2,5-dimethoxy-N-(p-tolyl)benzamide.

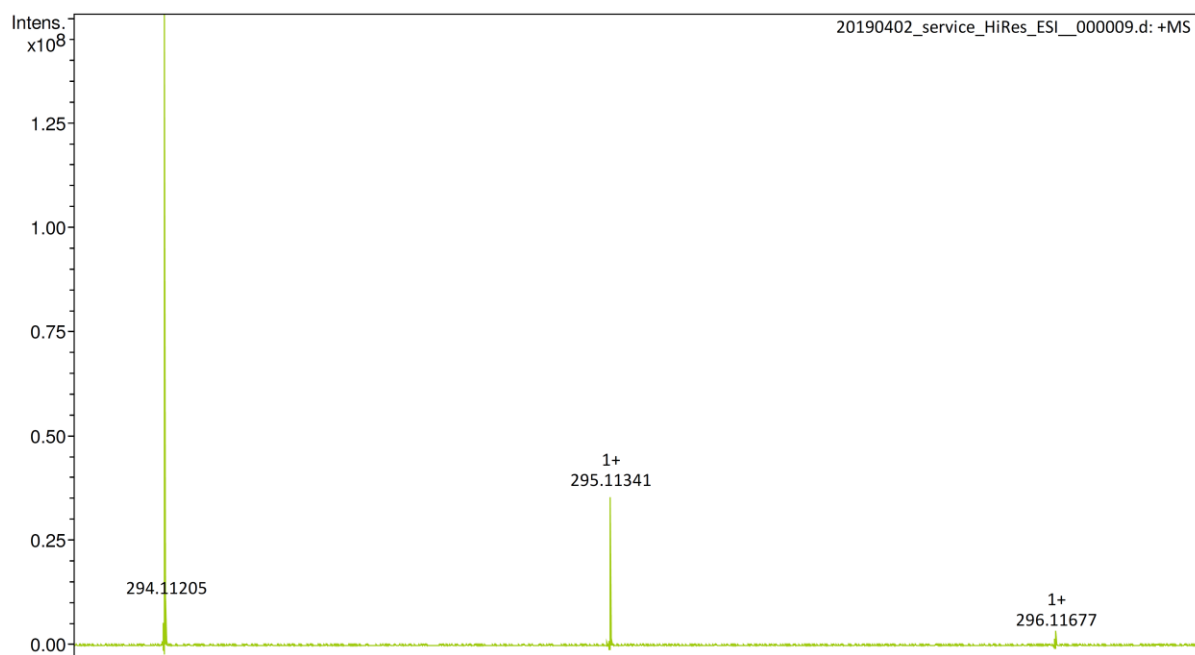

Figure 4. HR-MS of 2,5-dimethoxy-N-(p-tolyl)benzamide

## N-(4-fluorophenyl)-2,5-dimethoxybenzamide

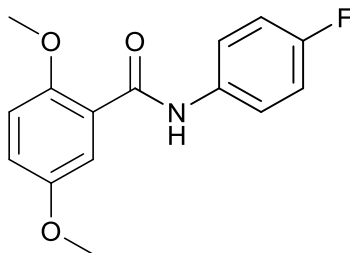

2,5-dimethoxybenzoyl chloride (0.690 g, 3.44 mmol) was dissolved in acetonitrile (20 mL) before a portion of  $\text{K}_2\text{CO}_3$  (0.625 g, 4.52 mmol) was added. Subsequently, 4-fluoroaniline (0.382 g, 3.44 mmol) was added and the mixture left to stir at room temperature for 2 days. The solvent was removed on a rotary evaporator before the resultant solid was redissolved in EtOAc and washed with 1M NaOH solution. The solvent was again removed, and the solid recrystallised from ether to yield a fine, white crystalline product (0.515 g, 1.87 mmol, 55%).

**$^1\text{H}$  NMR** (500 MHz,  $\text{DMSO}-d_6$ ) 10.17 (1 H, s), 7.76 (2 H, dd, J 9.0, 5.1), 7.21 (1 H, d, J 3.0), 7.18 (2 H, t, J 8.9), 7.12 (1 H, d, J 9.0), 7.07 (1 H, dd, J 9.0, 3.0), 3.85 (3 H, s), 3.75 (3 H, s);  **$^{13}\text{C}\{^1\text{H}\}$  NMR** (101 MHz,  $\text{DMSO}-d_6$ )  $\delta$  ppm 164.4 (s), 158.7 (d, J 240.1), 153.5 (s), 151.1 (s), 135.8 (d, J 2.5), 125.7 (s), 122.0 (d, J 7.8), 117.8 (s), 115.7 (d, J 22.2), 115.0 (s), 114.0 (s), 56.9 (s), 56.1 (s).

**LR-MS** ( $\text{ESI}^+$ )  $m/z$  298.13  $[\text{M} + \text{Na}]^+$ , 573.16  $[2\text{M} + \text{Na}]^+$ ; **HR-MS** ( $\text{ESI}^+$ ) calcd for  $\text{C}_{15}\text{H}_{14}\text{FNO}_3$   $[\text{M}+\text{Na}]^+$ : 298.08554, found  $m/z$  298.08499.

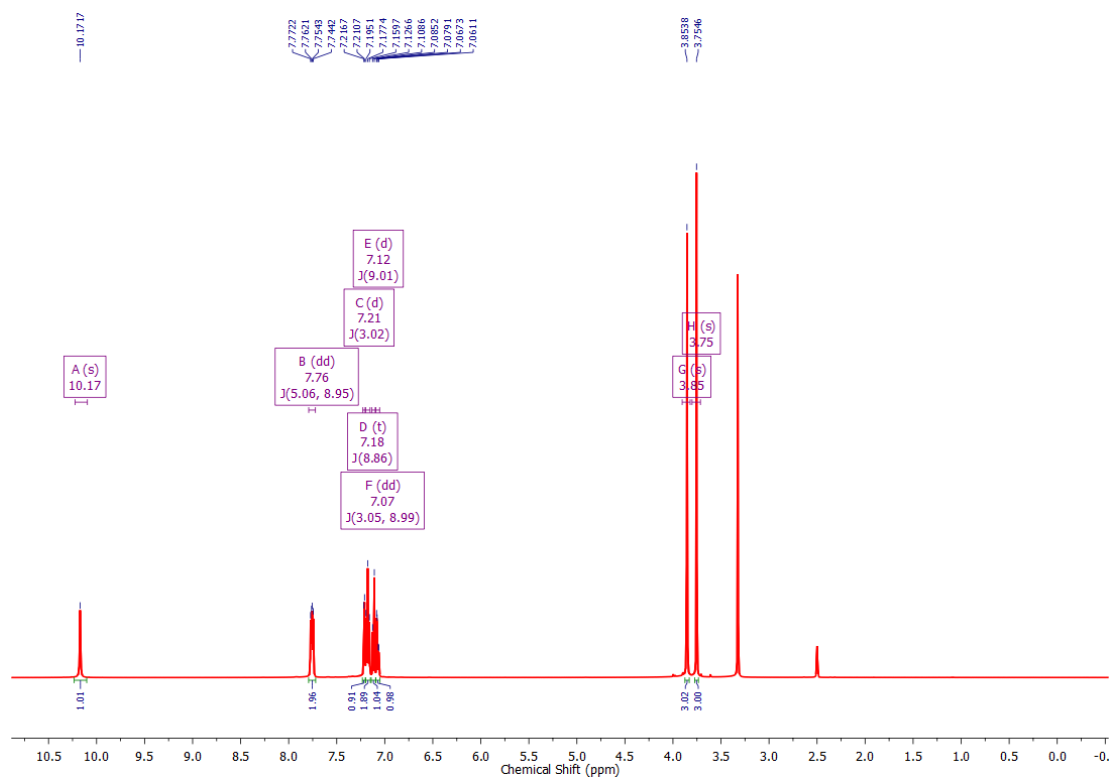

Figure 5. <sup>1</sup>H NMR (500 MHz) spectrum of N-(4-fluorophenyl)-2,5-dimethoxybenzamide in (CD<sub>3</sub>)<sub>2</sub>SO<sub>3</sub> at 298 K.

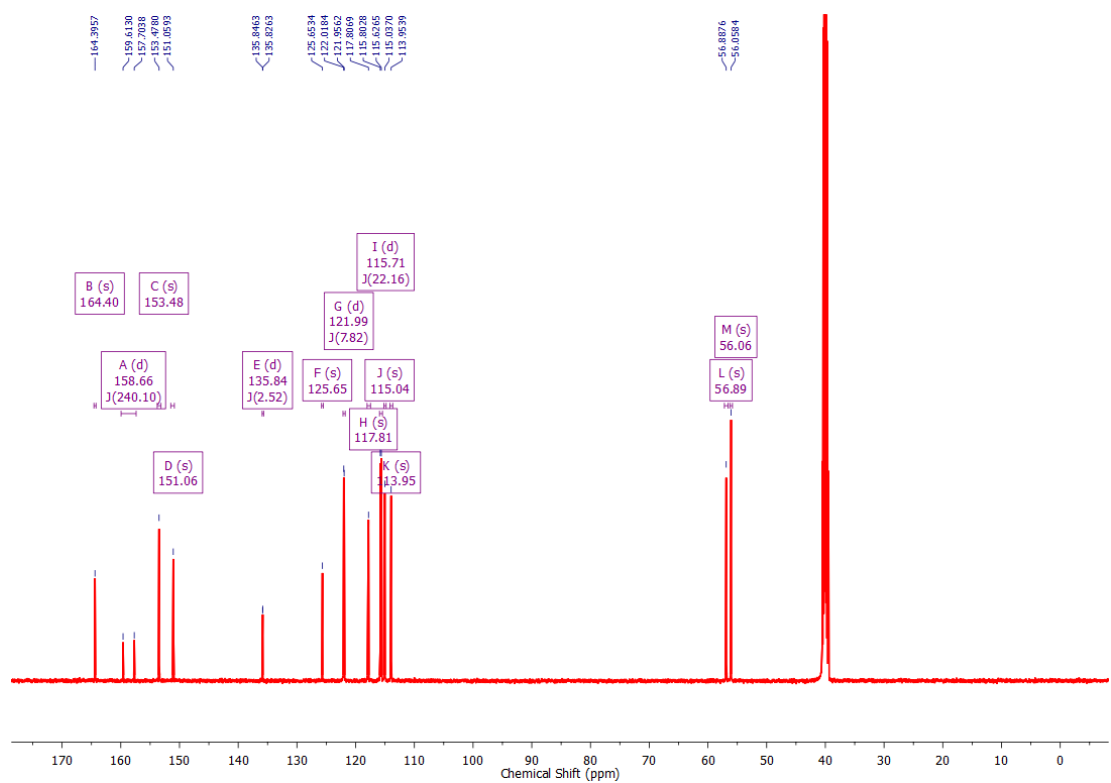

Figure 6. <sup>13</sup>C{<sup>1</sup>H} NMR (101 MHz) spectrum of N-(4-fluorophenyl)-2,5-dimethoxybenzamide in (CD<sub>3</sub>)<sub>2</sub>SO at 298 K.

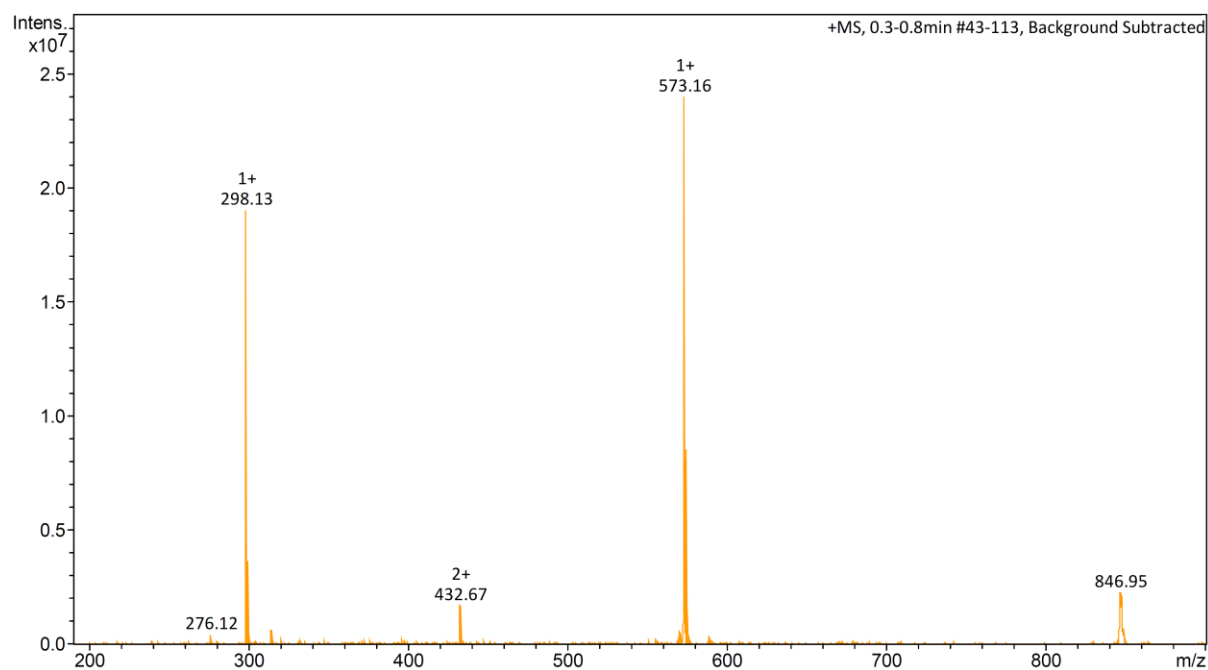

Figure 7. LR-MS (ESI<sup>+</sup>) of N-(4-fluorophenyl)-2,5-dimethoxybenzamide.

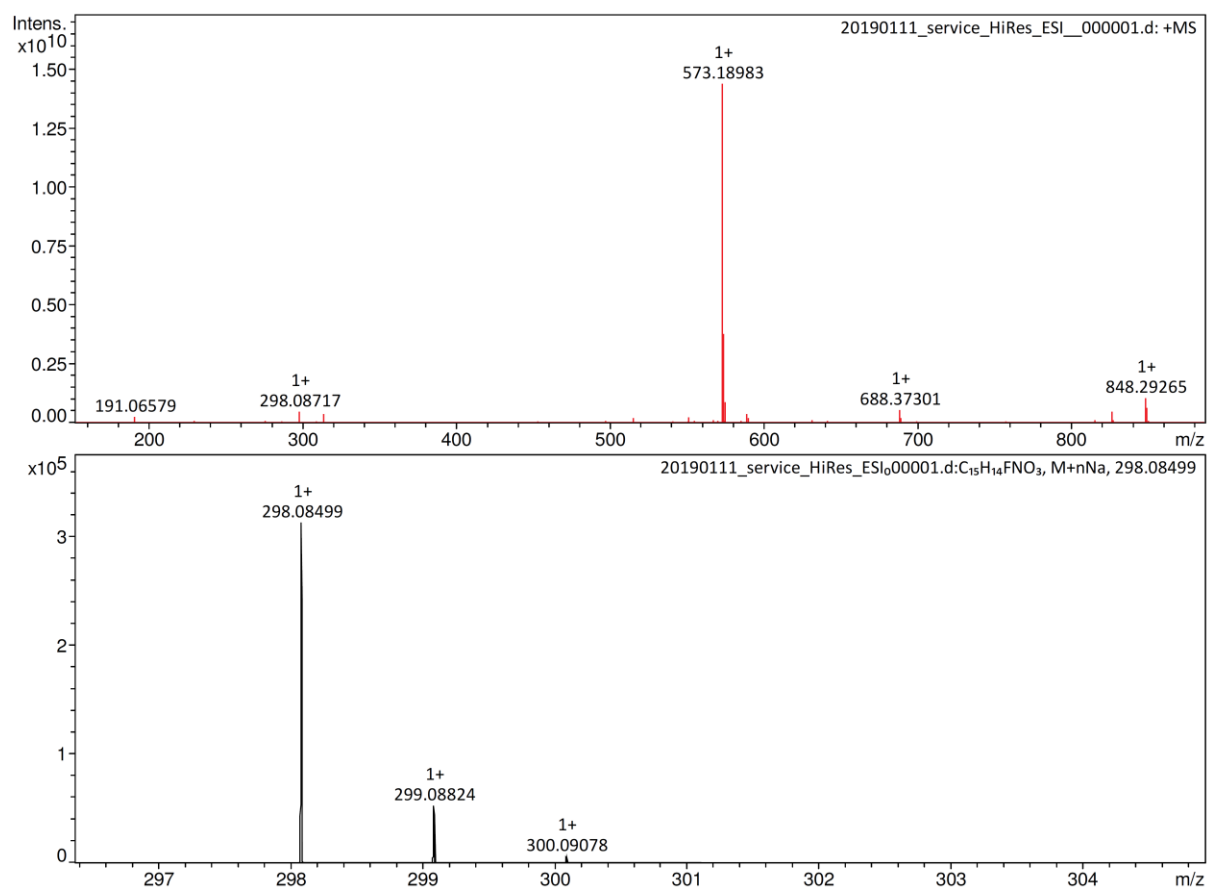

Figure 8. HR-MS (ESI<sup>+</sup>) of N-(4-fluorophenyl)-2,5-dimethoxybenzamide.

## *N*-(3,5-bis(trifluoromethyl)phenyl)-2,5-dimethoxybenzamide

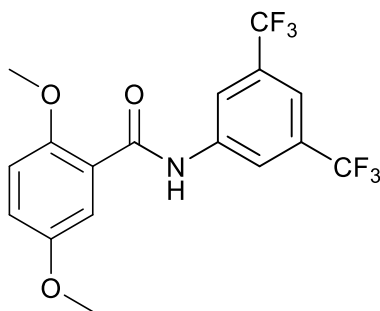

2,5-dimethoxybenzoyl chloride (1.00 g, 4.99 mmol) was dissolved in acetonitrile (20 mL) before a portion of  $\text{K}_2\text{CO}_3$  (0.892 g, 6.45 mmol) was added. Subsequently, 3,5-(trifluoromethoxy)aniline (1.1143 g, 4.99 mmol) was added and the mixture left to stir at room temperature for 2 days. The solvent was removed on a rotary evaporator before the resultant solid was redissolved in EtOAc and washed with 1M NaOH solution. The solvent was again removed, and the solid recrystallised from ether to yield a dark yellow product (1.357 g, 3.45 mmol, 69%).

**$^1\text{H}$  NMR** (500 MHz,  $\text{DMSO}-d_6$ )  $\delta$  ppm 10.72 (1 H, s), 8.46 (2 H, s), 7.79 (1 H, s), 7.24 (1 H, d, J 2.9), 7.15 (1 H, d, J 9.0), 7.12 (1 H, dd, J 9.0, 2.9), 3.86 (3 H, s), 3.76 (3 H, s);  **$^{13}\text{C}\{^1\text{H}\}$  NMR** (101 MHz,  $\text{CDCl}_3-d$ )  $\delta$  ppm 165.6 (s), 153.5 (s), 151.2 (s), 141.3 (s), 131.2 (q, J 32.8), 124.9 (s), 123.7 (q, J 272.8), 120.0 (d, J 3.0), 118.5 (s), 116.8 (dt, J 7.3, 3.7), 115.1 (s), 114.0 (s), 56.9 (s), 56.1 (s).

**LR-MS** ( $\text{ESI}^+$ )  $m/z$  416.12  $[\text{M} + \text{Na}]^+$ , 809.05  $[2\text{M} + \text{Na}]^+$ ; **HR-MS** ( $\text{ESI}^+$ ) calcd for  $\text{C}_{17}\text{H}_{13}\text{F}_6\text{NO}_3$   $[\text{M} + \text{Na}]^+$ : 416.06973, found  $m/z$  416.06918

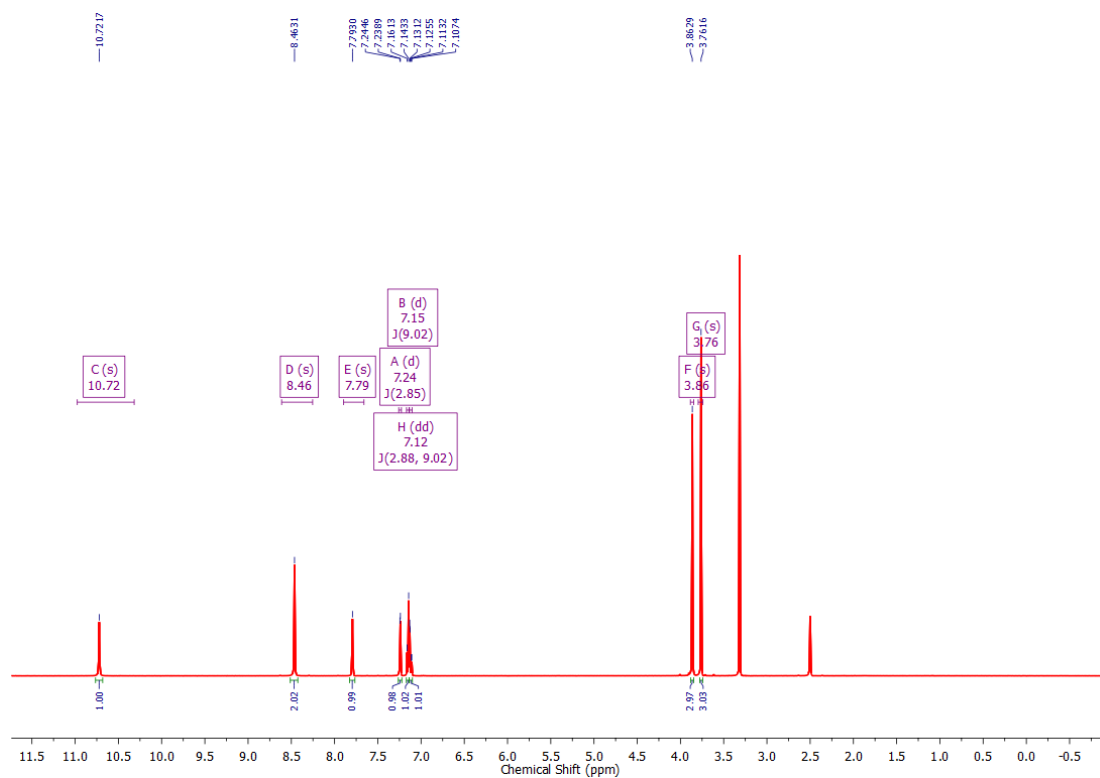

Figure 9. <sup>1</sup>H NMR (500 MHz) spectrum of *N*-(3,5-bis(trifluoromethyl)phenyl)-2,5-dimethoxybenzamide in (CD<sub>3</sub>)<sub>2</sub>SO at 298 K.

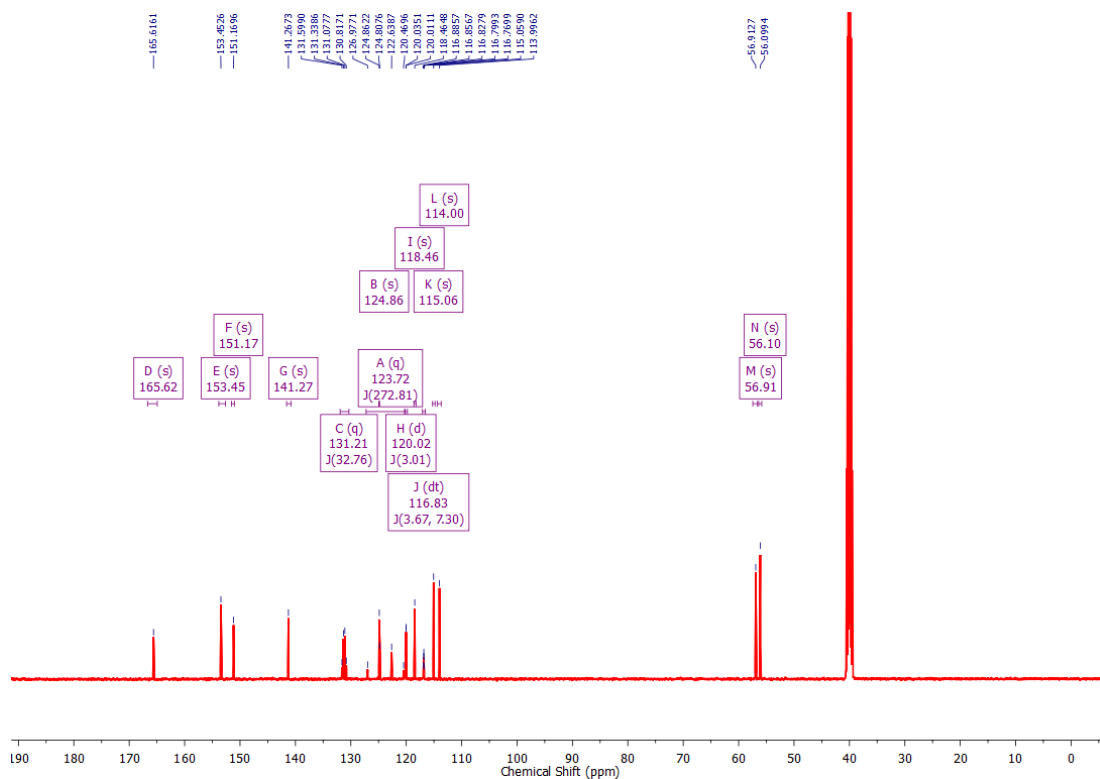

Figure 10. <sup>13</sup>C{<sup>1</sup>H} NMR (101 MHz) spectrum of *N*-(3,5-bis(trifluoromethyl)phenyl)-2,5-dimethoxybenzamide in (CD<sub>3</sub>)<sub>2</sub>SO at 298 K.

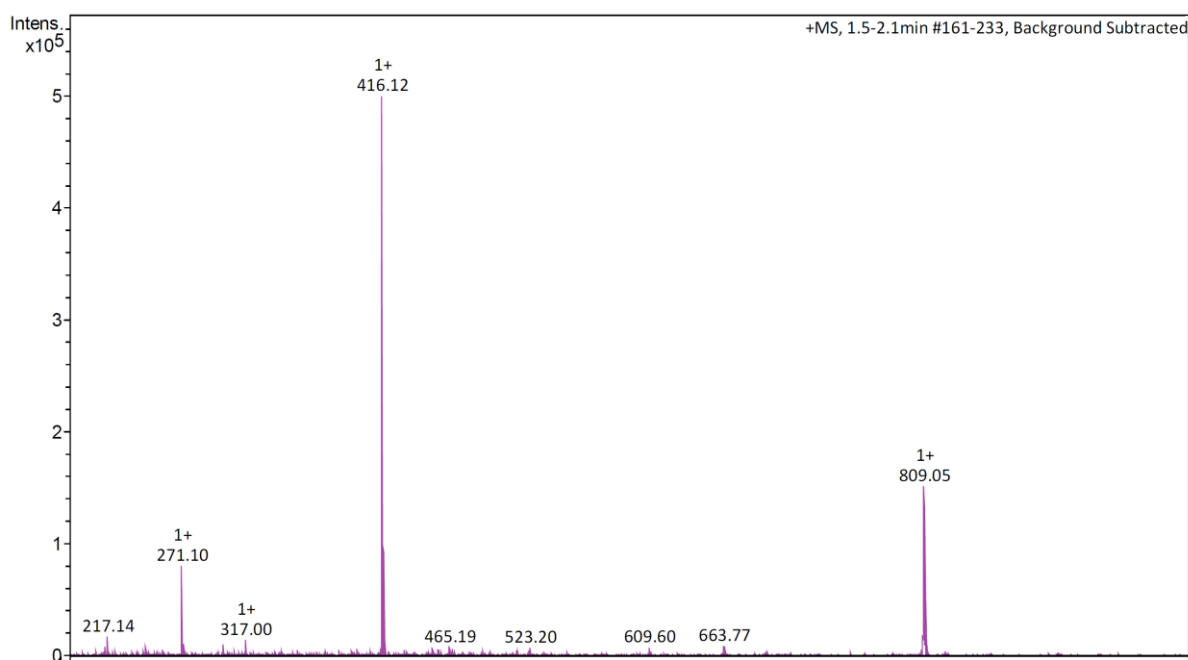

Figure 11. LR-MS (ESI<sup>+</sup>) of *N*-(3,5-bis(trifluoromethyl)phenyl)-2,5-dimethoxybenzamide.

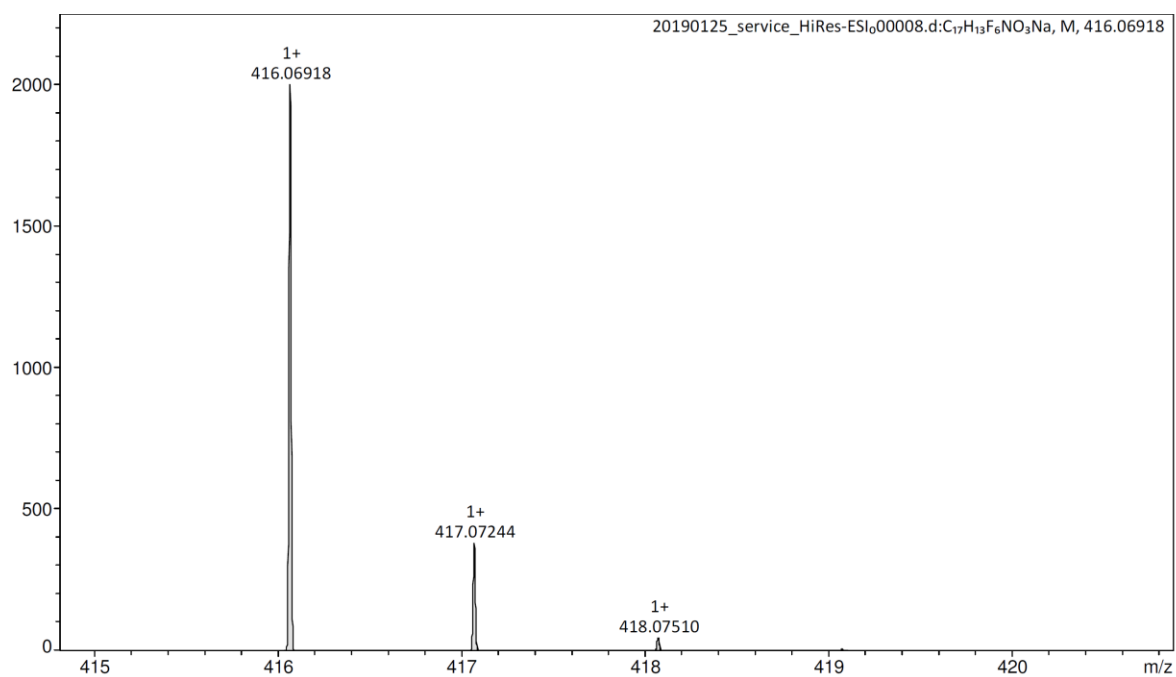

Figure 12. HR-MS (ESI<sup>+</sup>) of *N*-(3,5-bis(trifluoromethyl)phenyl)-2,5-dimethoxybenzamide.

## 2,5-dihydroxy-*N*-phenylbenzamide

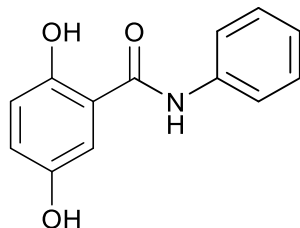

This compound was synthesised following literature procedure [1]. 2,5-dimethoxy-*N*-phenylbenzamide (0.418 g, 1.62 mmol) was dissolved as much as possible in dry DCM (5 mL), and the solution was cooled to 0 °C under a N<sub>2</sub> atmosphere. Subsequently, BBr<sub>3</sub> (1.947 g, 7.77 mmol) in 1M DCM solution (7.7 mL) was added dropwise, and the mixture sustained at 0 °C for 1 hour. The solution was allowed to warm to room temperature and stirred for another 5 hours. Following this, the solution was poured into a conical flask and deionised water (20 mL) was poured in to elicit the formation of a precipitate. This mixture was stirred for 15 minutes, and deionised water was also added to the original rbf to collect any residue. Next, the precipitate was filtered using a Büchner funnel and the solid washed with hexane (3 x 30 mL). The solid was collected from the filter paper and dried under vacuum to afford a brown solid (0.358 g, 1.56 mmol, 96%). The NMR spectra were consistent with those previously obtained in the literature.

## 2,5-dihydroxy-N-(p-tolyl)benzamide

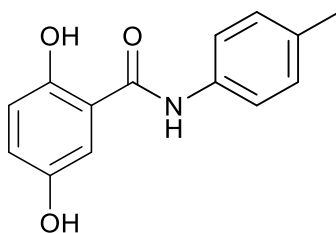

2,5-dimethoxy-N-(p-tolyl)benzamide (0.198 g, 0.74 mmol) was dissolved as much as possible in dry DCM (7 mL), and the solution was cooled to 0 °C under a N<sub>2</sub> atmosphere. Subsequently, BBr<sub>3</sub> (1.052 g, 4.2 mmol) in 1M DCM solution (4.2 mL) was added dropwise. The clear solution immediately changed to milky white and the temperature was sustained at 0 °C for 1 hour. The solution was allowed to warm to room temperature and stirred overnight. Following this, the solution had turned back to clear and was poured into a conical flask before deionised water (20 mL) was poured in to elicit the formation of a whitish-brown precipitate. This mixture was stirred for 15 minutes, and deionised water was also added to the original rbf to collect any residue. Next, the precipitate was filtered using a Büchner funnel and the solid washed with hexane (3 x 30 mL). The solid was collected from the filter paper and dried under vacuum to afford a whitish-brown solid (0.164 g, 0.67 mmol, 92%).

**<sup>1</sup>H NMR** (400 MHz, DMSO-*d*<sub>6</sub>) δ ppm 10.32 (1 H, s), 7.57 (2 H, d, J 8.3), 7.36 (1 H, d, J 2.8), 7.15 (2 H, d, J 8.3), 6.88 (1 H, dd, J 8.8, 2.9), 6.81 (1 H, d, J 8.8), 2.27 (3 H, s); **<sup>13</sup>C{<sup>1</sup>H} NMR** (101 MHz, DMSO-*d*<sub>6</sub>) δ ppm 165.9 (s), 150.8 (s), 149.8 (s), 135.8 (s), 133.2 (s), 129.3 (s), 120.9 (s), 120.7 (s), 117.9 (s), 114.7 (s), 114.5 (s), 20.5 (d, J 16.1).

**LR-MS** (ESI<sup>+</sup>) 266.10 [M + Na]<sup>+</sup>; **HR-MS** (ESI<sup>+</sup>) calcd for C<sub>14</sub>H<sub>13</sub>NO<sub>3</sub> [M+Na]<sup>+</sup>: 266.07931, found *m/z* 266.07876

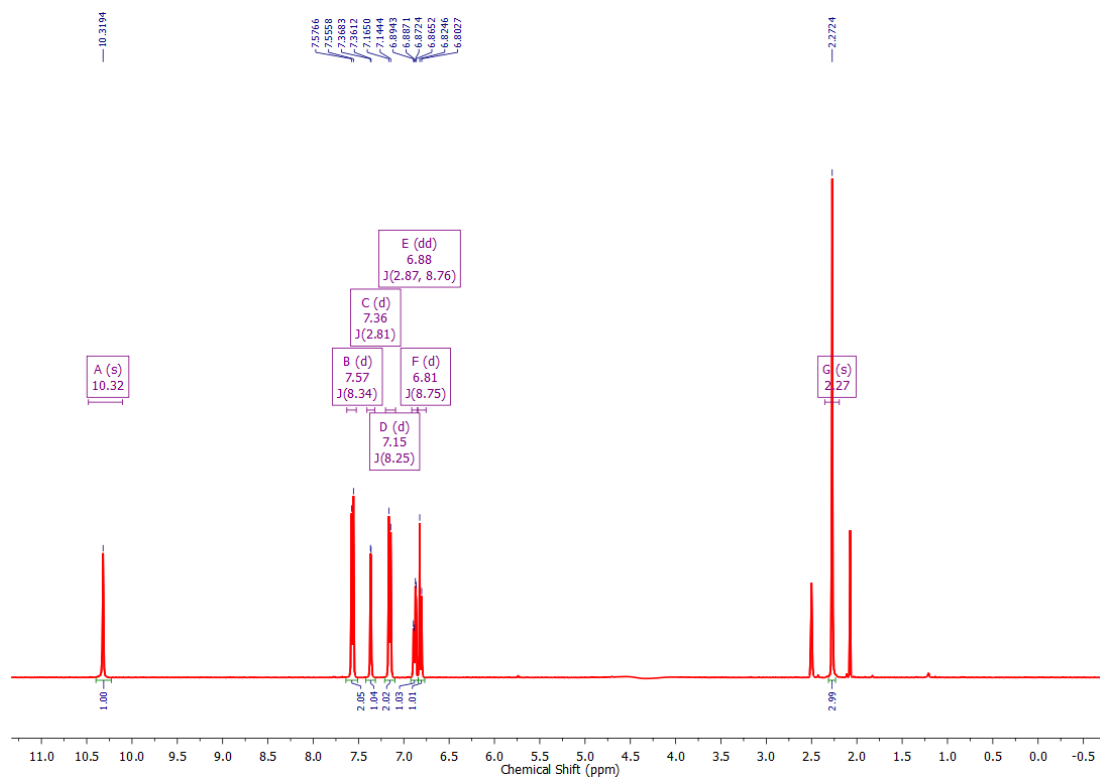

Figure 17. <sup>1</sup>H NMR (400 MHz) spectrum of 2,5-dihydroxy-N-(p-tolyl)benzamide in (CD<sub>3</sub>)<sub>2</sub>SO at 298 K.

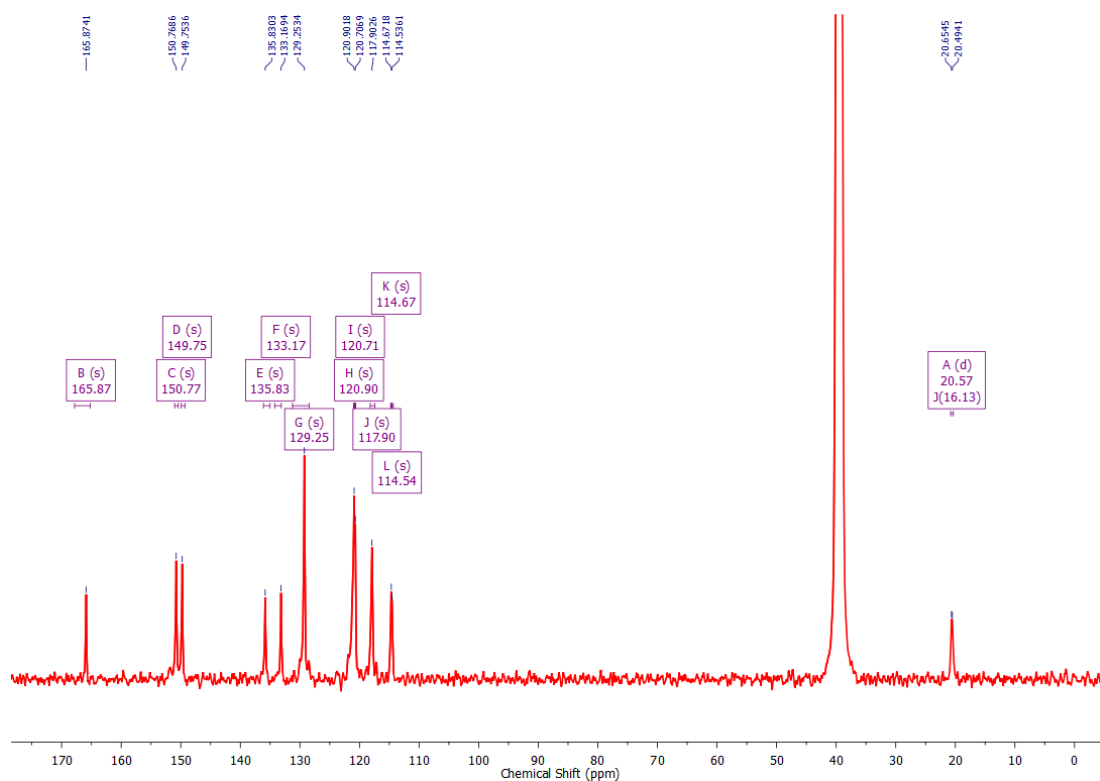

Figure 18. <sup>13</sup>C{<sup>1</sup>H} NMR (101 MHz) spectrum of 2,5-dihydroxy-N-(p-tolyl)benzamide in (CD<sub>3</sub>)<sub>2</sub>SO at 298 K.

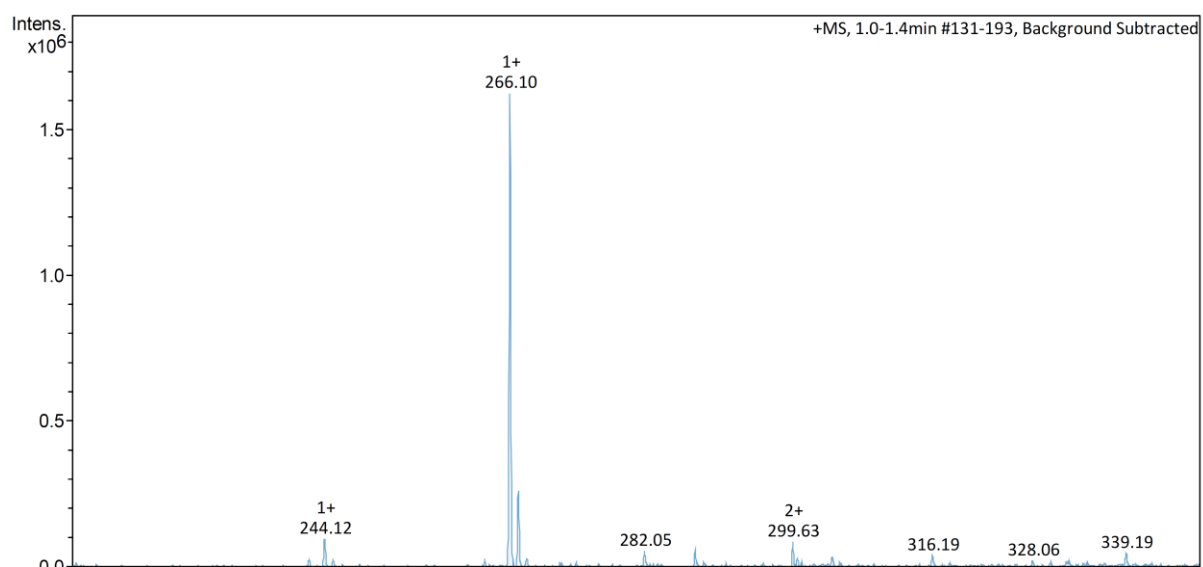

Figure 19. LR-MS (ESI<sup>+</sup>) of 2,5-dihydroxy-N-(p-tolyl)benzamide.

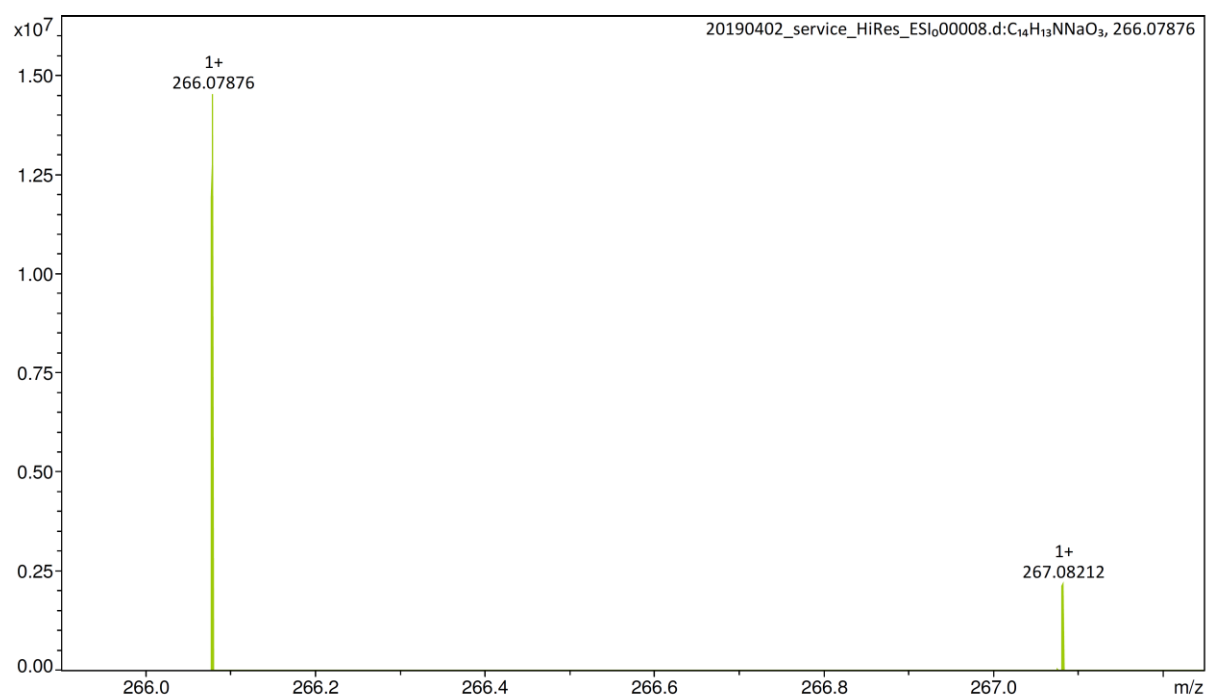

Figure 20. HR-MS (ESI<sup>+</sup>) of 2,5-dihydroxy-N-(p-tolyl)benzamide.

## *N*-(4-fluorophenyl)-2,5-dihydroxybenzamide

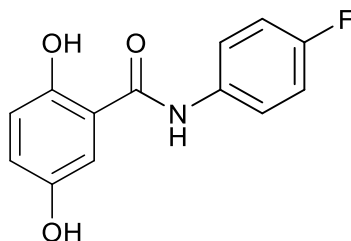

*N*-(4-fluorophenyl)-2,5-dimethoxybenzamide (0.045 g, 0.16 mmol) was dissolved in dry DCM (6 mL), and the solution was cooled to 0 °C under a N<sub>2</sub> atmosphere. Subsequently, BBr<sub>3</sub> (0.213 g, 0.85 mmol) in 1M DCM solution (1 mL) was added dropwise. The purple solution immediately changed to dark brown and the temperature sustained at 0 °C for 1 hour. The solution was then allowed to warm to room temperature and stirred overnight. Following this, the solution was a lighter brown in colour and was poured into a conical flask before deionised water (20 mL) was poured in to elicit the formation of a precipitate. This mixture was stirred for 15 minutes, and deionised water was also added to the original rbf to collect any residue. Next, the precipitate was filtered using a Büchner funnel and the solid washed with hexane (3 x 30 mL). The solid was collected from the filter paper and dried under vacuum to afford a whitish-brown solid (0.034 g, 0.14 mmol, 83%).

**<sup>1</sup>H NMR** (500 MHz, DMSO-*d*<sub>6</sub>) δ ppm 11.00 (1 H, s), 10.39 (1 H, s), 9.09 (1 H, s), 7.71 (2 H, dd, J 9.0, 5.0), 7.34 (1 H, d, J 2.9), 7.19 (2 H, t, J 8.9), 6.88 (1 H, dd, J 8.8, 2.9), 6.82 (1 H, d, J 8.8); **<sup>13</sup>C{<sup>1</sup>H} NMR** (101 MHz, DMSO-*d*<sub>6</sub>) δ ppm 166.4 (s), 159.0 (d, J 240.7), 151.2 (s), 150.1 (s), 135.1 (d, J 2.6), 123.1 (d, J 7.9), 121.6 (s), 118.3 (s), 118.2 (s), 115.8 (d, J 22.2), 114.9 (s).

**LR-MS** (ESI<sup>-</sup>) *m/z* 246.07 [M - H]<sup>-</sup>, 493.18 [2M - H]<sup>-</sup>; **HR-MS** (ESI<sup>-</sup>) calcd for C<sub>13</sub>H<sub>10</sub>FNO<sub>3</sub> [M-H]<sup>-</sup>: 246.05653, found *m/z* 246.05719.

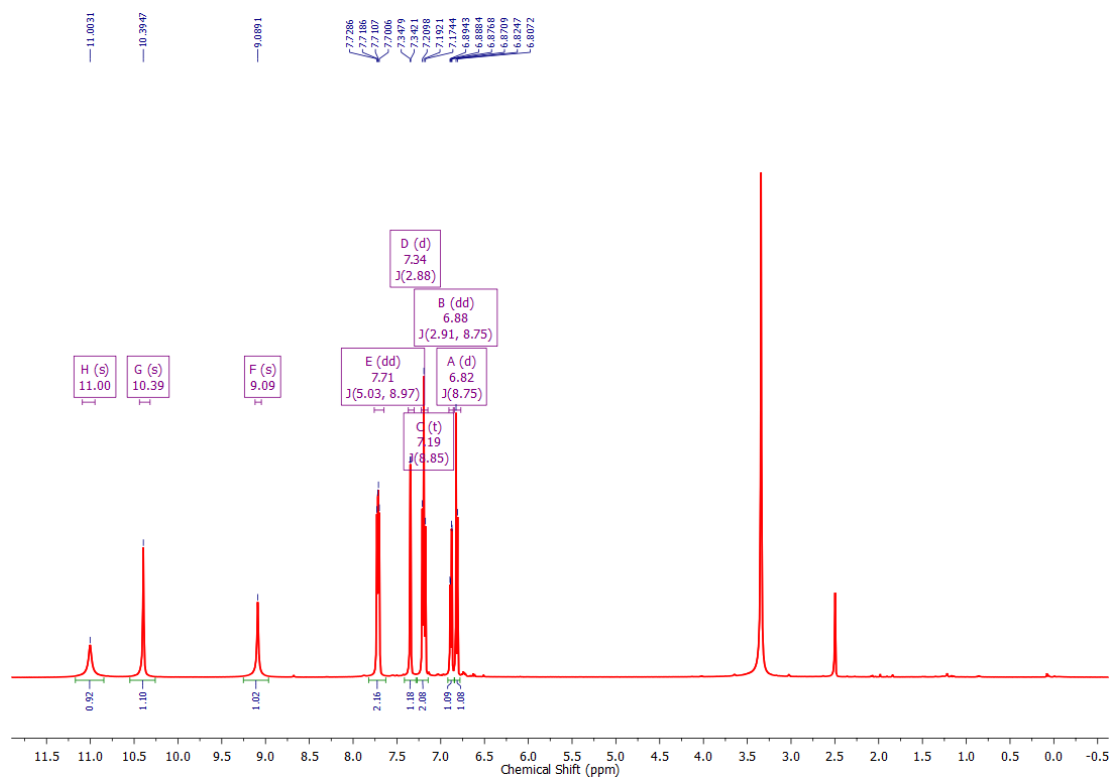

Figure 21.  $^1\text{H}$  NMR (500 MHz) spectrum of N-(4-fluorophenyl)-2,5-dihydroxybenzamide in  $(\text{CD}_3)_2\text{SO}$  at 298 K.

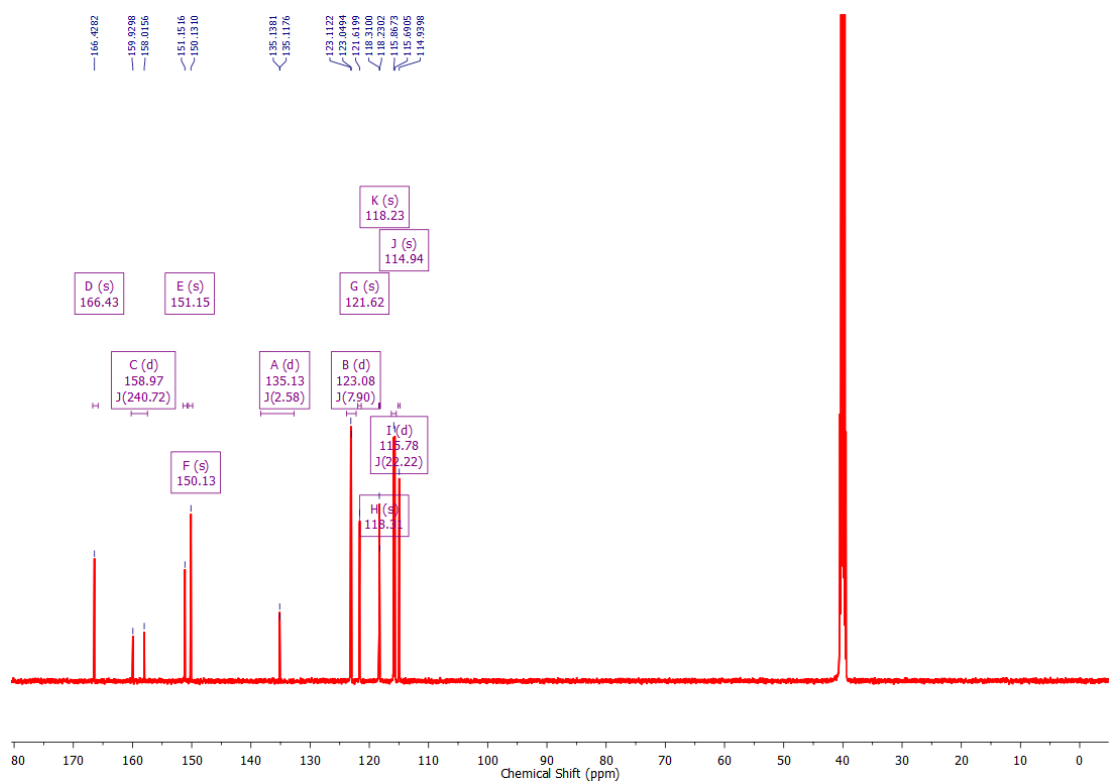

Figure 22.  $^{13}\text{C}\{^1\text{H}\}$  NMR (101 MHz) spectrum of N-(4-fluorophenyl)-2,5-dihydroxybenzamide in  $(\text{CD}_3)_2\text{SO}$  at 298 K.

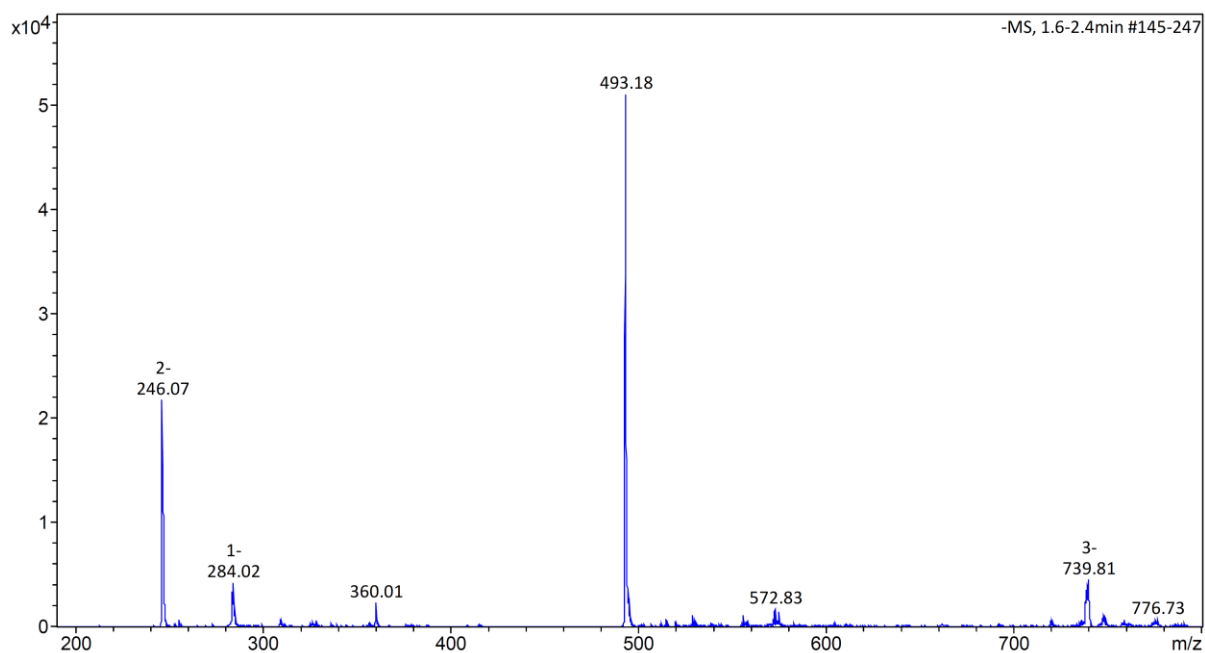

Figure 23. LR-MS (ESI<sup>+</sup>) of N-(4-fluorophenyl)-2,5-dihydroxybenzamide.

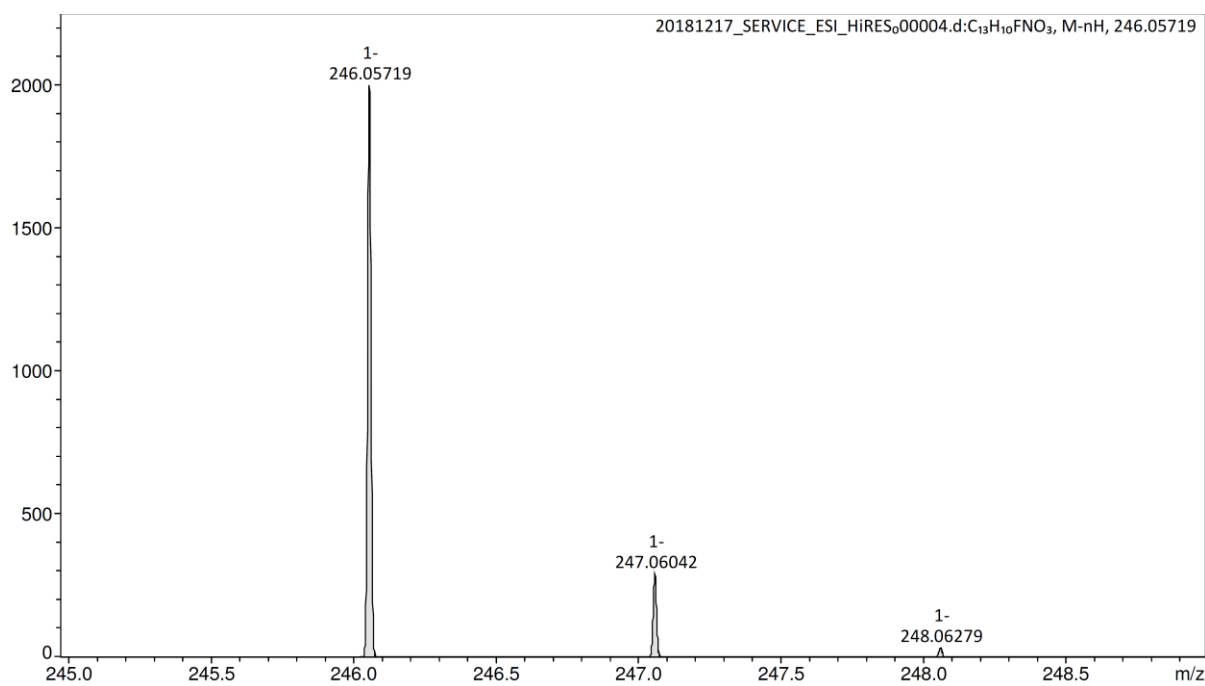

Figure 24. HR-MS (ESI<sup>+</sup>) of N-(4-fluorophenyl)-2,5-dihydroxybenzamide.

## *N*-(3,5-bis(trifluoromethyl)phenyl)-2,5-dihydroxybenzamide

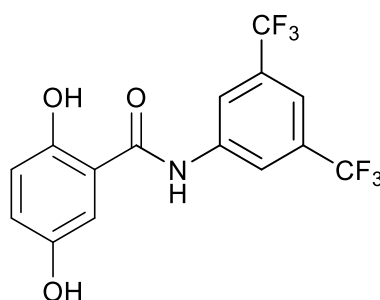

*N*-(3,5-bis(trifluoromethyl)phenyl)-2,5-dimethoxybenzamide (0.515 g, 1.31 mmol) was dissolved as much as possible in dry DCM (6 mL), and the solution was cooled to 0 °C under a N<sub>2</sub> atmosphere. Subsequently, BBr<sub>3</sub> (1.658 g, 6.62 mmol) in 1M DCM solution (6.6 mL) was added dropwise. The clear solution immediately changed to yellow in colour and the temperature sustained at 0 °C for 1 hour. The solution was then allowed to warm to room temperature and stirred for another 5 hours. Following this, the solution was poured into a conical flask and deionised water (20 mL) was poured in to elicit the formation of a green precipitate, which turned white after being in water for 15 minutes. In addition, deionised water was also added to the original rbf to collect any residue which was also stirred in deionised water for 15 minutes. Next, the precipitate was filtered using a Büchner funnel and the solid washed with hexane (3 x 30 mL). The solid was collected from the filter paper and dried under vacuum to afford a whitish-brown solid (0.395 g, 1.508 mmol, 83%).

**<sup>1</sup>H NMR** (500 MHz, DMSO-*d*<sub>6</sub>) δ ppm 10.82 (1 H, s), 10.68 (1 H, s), 9.16 (1 H, s), 8.45 (2 H, s), 7.80 (1 H, s), 7.29 (1 H, d, *J* 2.5), 6.91 (1 H, dd, *J* 8.8, 2.8), 6.85 (1 H, d, *J* 8.8); **<sup>13</sup>C{<sup>1</sup>H} NMR** (101 MHz, DMSO-*d*<sub>6</sub>) δ ppm 167.0 (s), 150.7 (s), 150.3 (s), 140.9 (s), 131.2 (q, *J* 32.8), 123.7 (q, *J* 272.7), 122.0 (s), 120.7 (q[poorly defined], *J* 3.3), 118.6 (s), 118.4 (s), 117.0 (s), 115.1 (s).

**LR-MS** (ESI<sup>-</sup>) *m/z* 363.85 [M - H]<sup>-</sup>; **HR-MS** (ESI<sup>+</sup>) calcd for C<sub>15</sub>H<sub>9</sub>F<sub>6</sub>NO<sub>3</sub> [M+Na]<sup>+</sup>: 388.03843, found *m/z* 388.03788

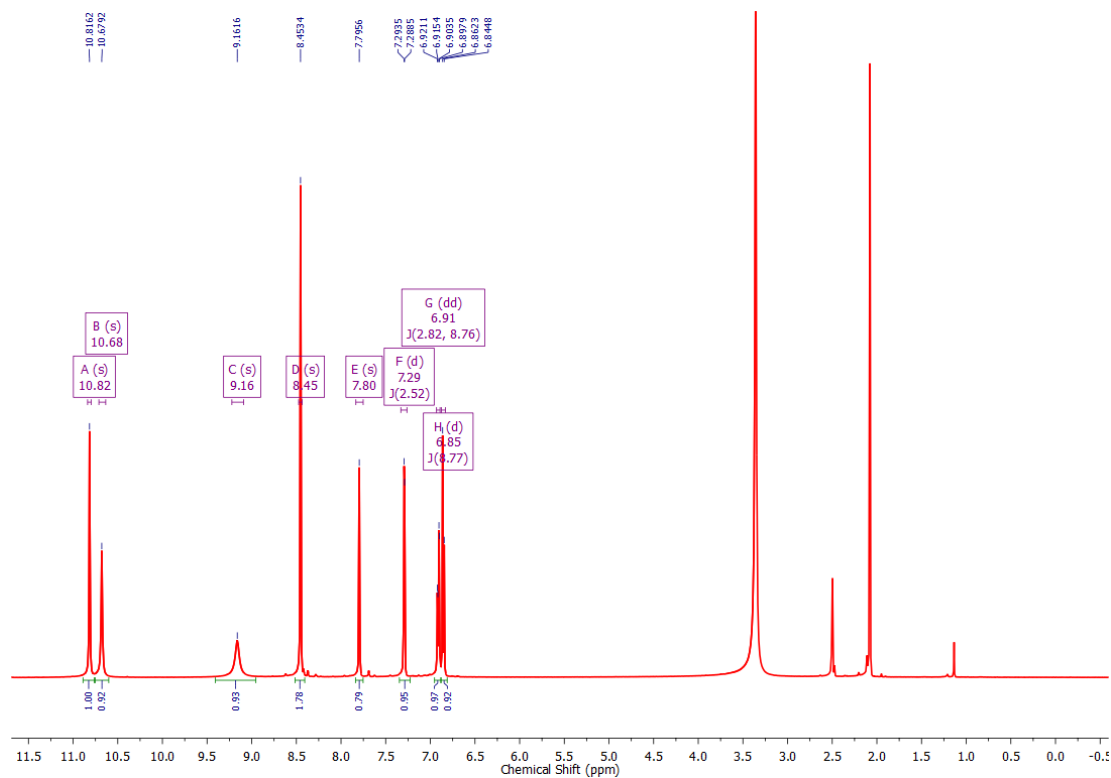

Figure 25. <sup>1</sup>H NMR (500 MHz) spectrum of N-(3,5-bis(trifluoromethyl)phenyl)-2,5-dimethoxybenzamide in (CD<sub>3</sub>)<sub>2</sub>SO at 298 K.

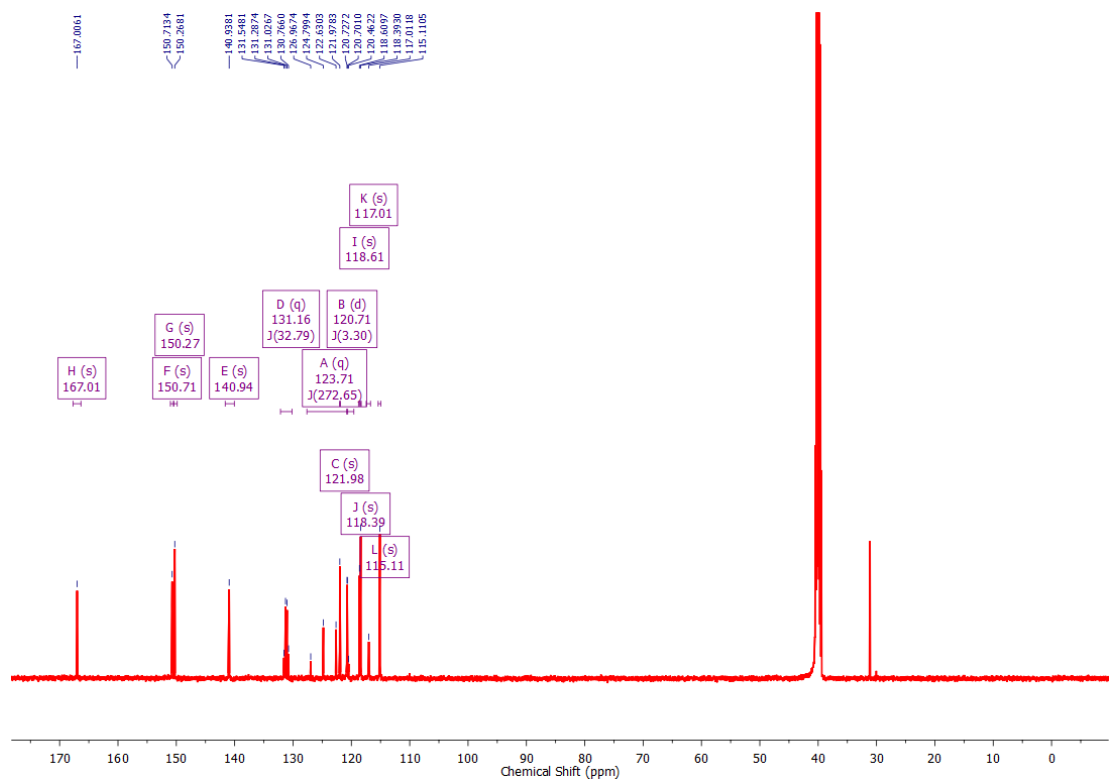

Figure 26. <sup>13</sup>C{<sup>1</sup>H} NMR (101 MHz) spectrum of N-(3,5-bis(trifluoromethyl)phenyl)-2,5-dimethoxybenzamide in (CD<sub>3</sub>)<sub>2</sub>SO at 298 K.

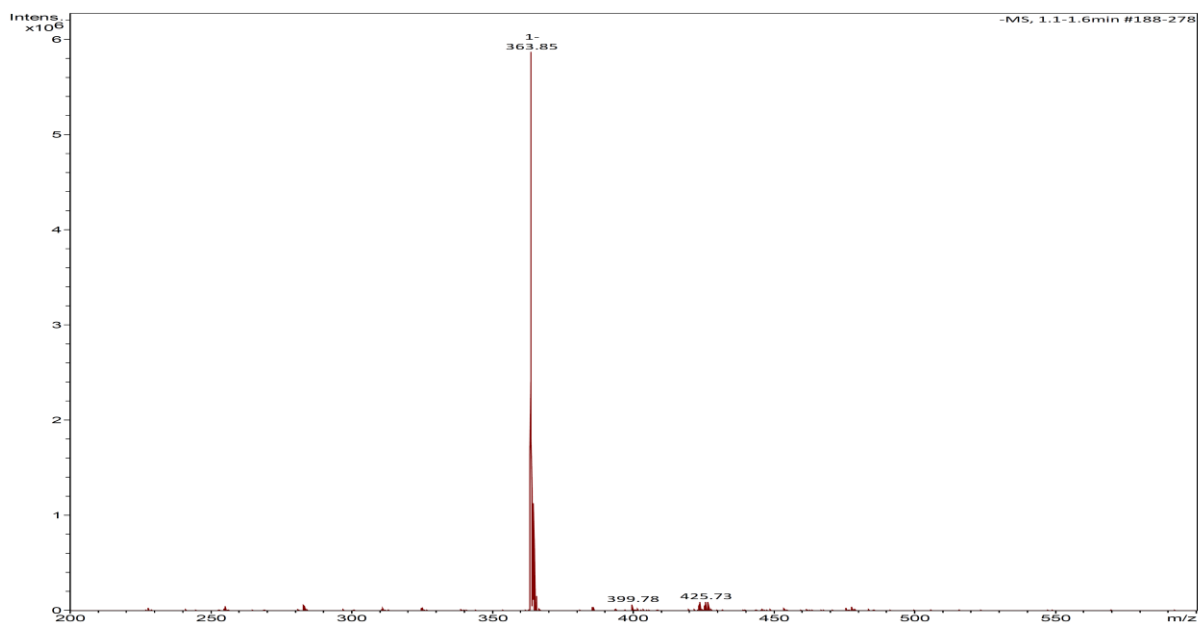

Figure 27. LR-MS (ESI) of N-(3,5-bis(trifluoromethyl)phenyl)-2,5-dimethoxybenzamide.

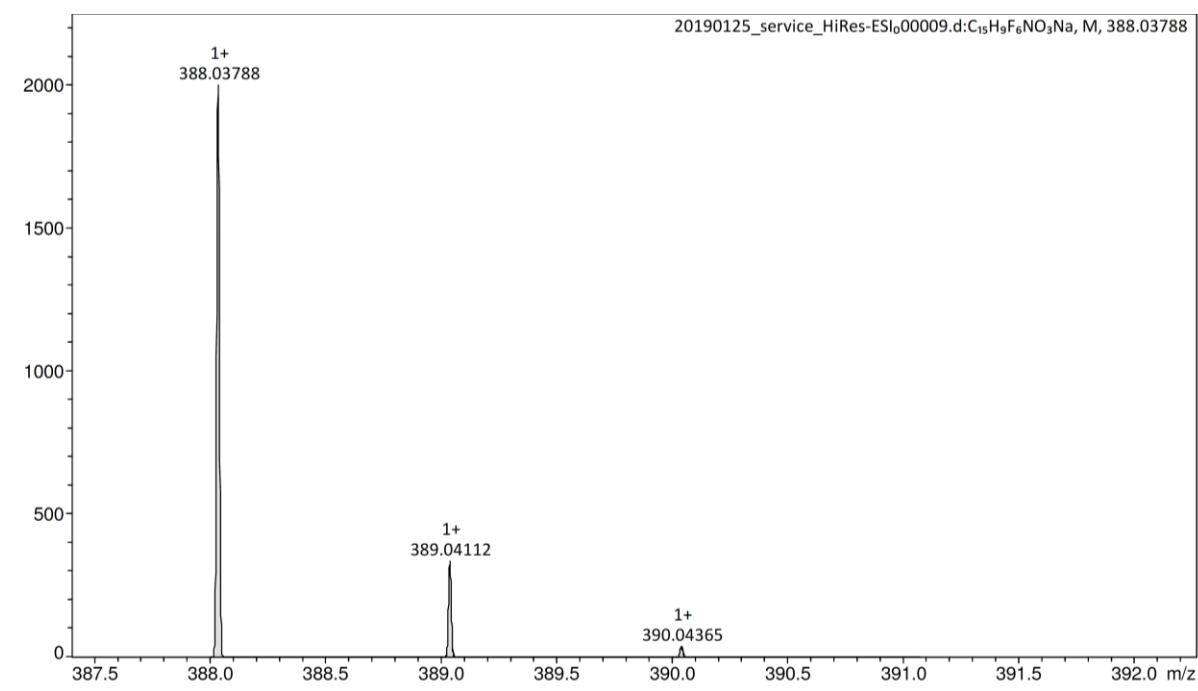

Figure 28. HR-MS (ESI<sup>+</sup>) of N-(3,5-bis(trifluoromethyl)phenyl)-2,5-dimethoxybenzamide.

### 3,6-dioxo-*N*-phenylcyclohexa-1,4-diene-1-carboxamide

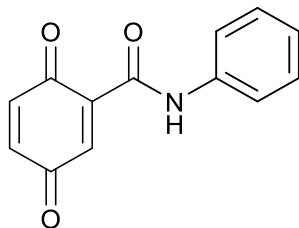

2,5-dimethoxy-*N*-phenylbenzamide (0.080 g, 0.35 mmol) and  $\text{Mg}_2\text{SO}_4$  (0.235 g, 1.95 mmol) were suspended in DCM (16 ml). To this suspension was added  $\text{Ag}_2\text{O}$  (0.145 g, 0.63 mmol) and the reaction was left to stir for 2 hours, which turned to orange in colour. The reaction was tracked *via* TLC using a 50% EtOAc/Hex solvent mixture. Having reached completion, the solution was filtered through celite and the solvent removed on a rotary evaporator to leave a bright orange solid (0.067 g, 0.3 mmol, 85%).

**$^1\text{H}$  NMR** (400 MHz,  $\text{CDCl}_3$ )  $\delta$  ppm 10.29 (1 H, s), 7.78 (1 H, s), 7.69 (2 H, d, J 7.8), 7.38 (2 H, t, J 7.9, 7.4), 7.18 (1 H, t, J 7.4), 6.89 (2 H, s);  **$^{13}\text{C}\{^1\text{H}\}$  NMR** (101 MHz,  $\text{CDCl}_3$ -d))  $\delta$  ppm 188.7, 187.1, 158.5, 139.9, 137.2, 137.1, 134.8, 129.2, 125.4, 120.7.

**LR-MS** (APCI)  $m/z$  228.01  $[\text{M}+\text{H}]^+$ ; **HR-MS** (APCI) calcd for  $\text{C}_{13}\text{H}_8\text{NO}_3$   $[\text{M}+\text{H}]^+$ : 228.05824, found  $m/z$  228.06552.

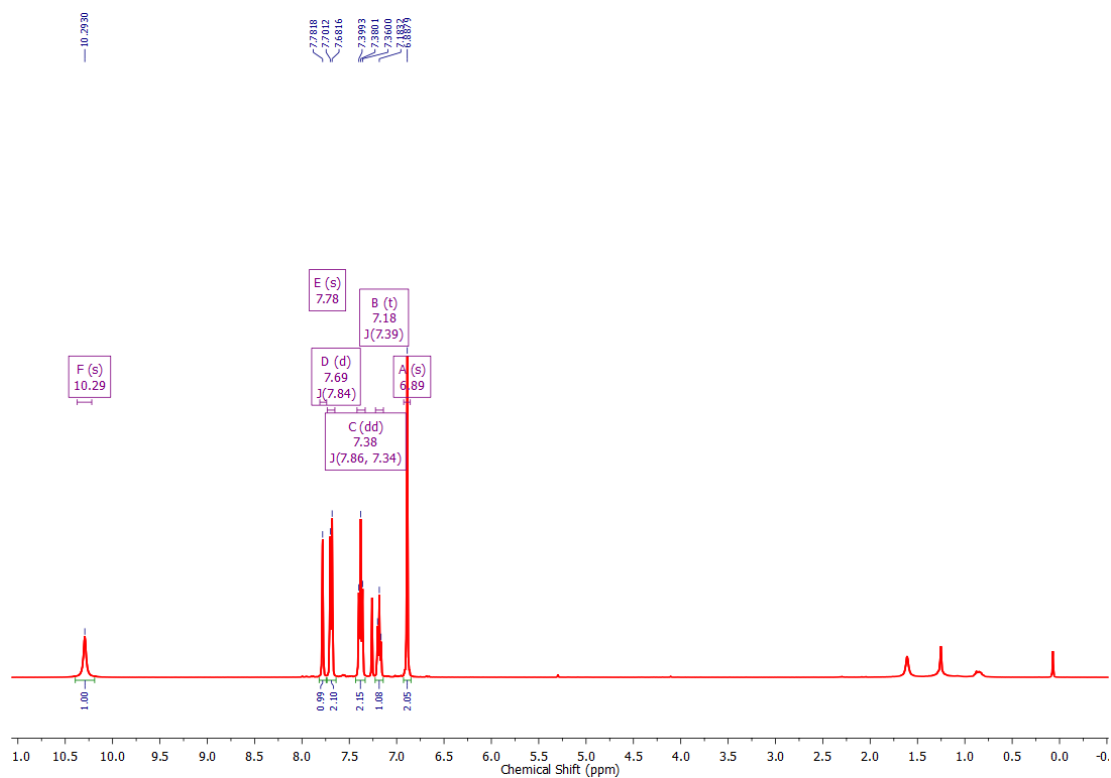

Figure 29.  $^1\text{H}$  NMR (400 MHz) spectrum of 3,6-dioxo-*N*-phenylcyclohexa-1,4-diene-1-carboxamide in  $\text{CDCl}_3$  at 298 K.

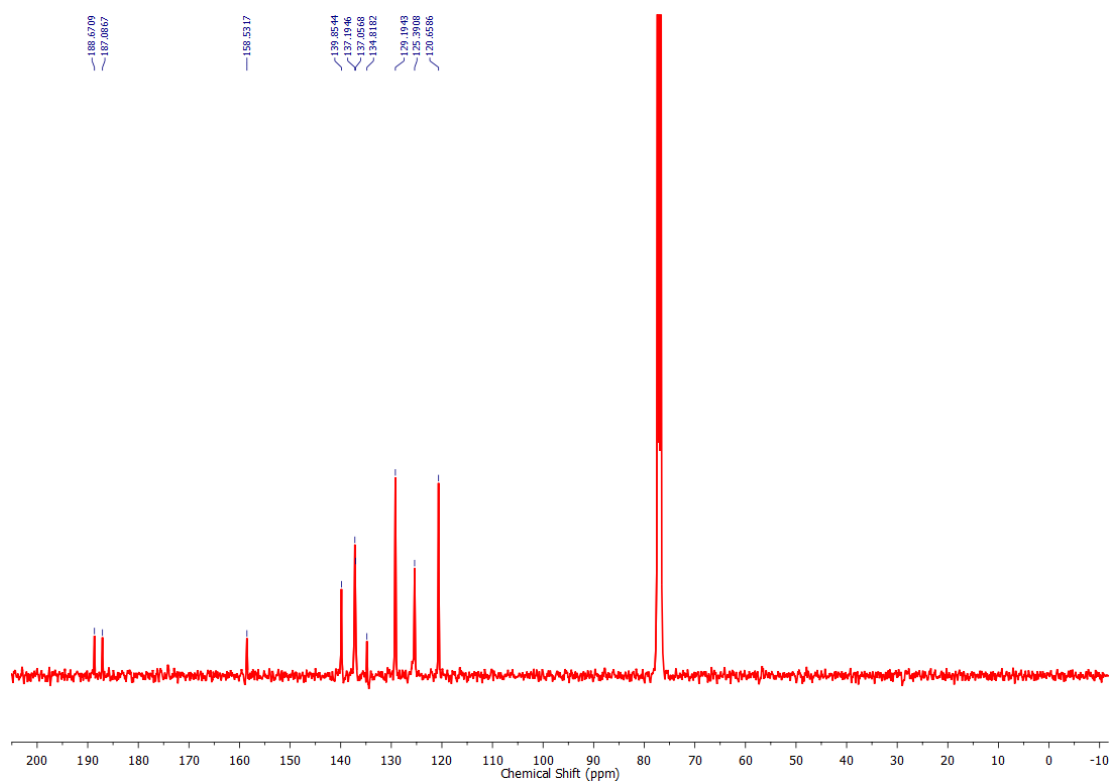

Figure 30.  $^{13}\text{C}\{^1\text{H}\}$  NMR (101 MHz) spectrum of 3,6-dioxo-*N*-phenylcyclohexa-1,4-diene-1-carboxamide in  $\text{CDCl}_3$  at 298 K.

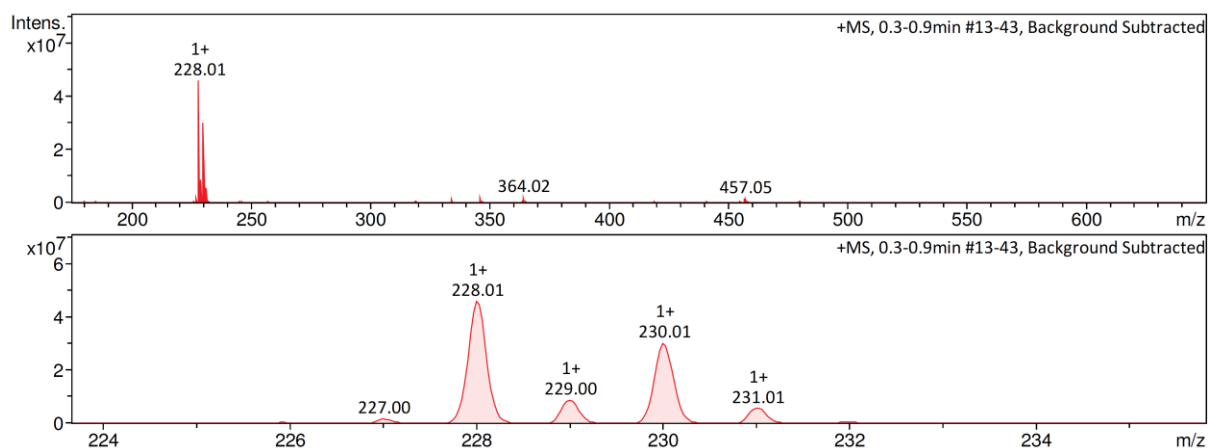

Figure 31. LR-MS (APCI) of 3,6-dioxo-*N*-phenylcyclohexa-1,4-diene-1-carboxamide.

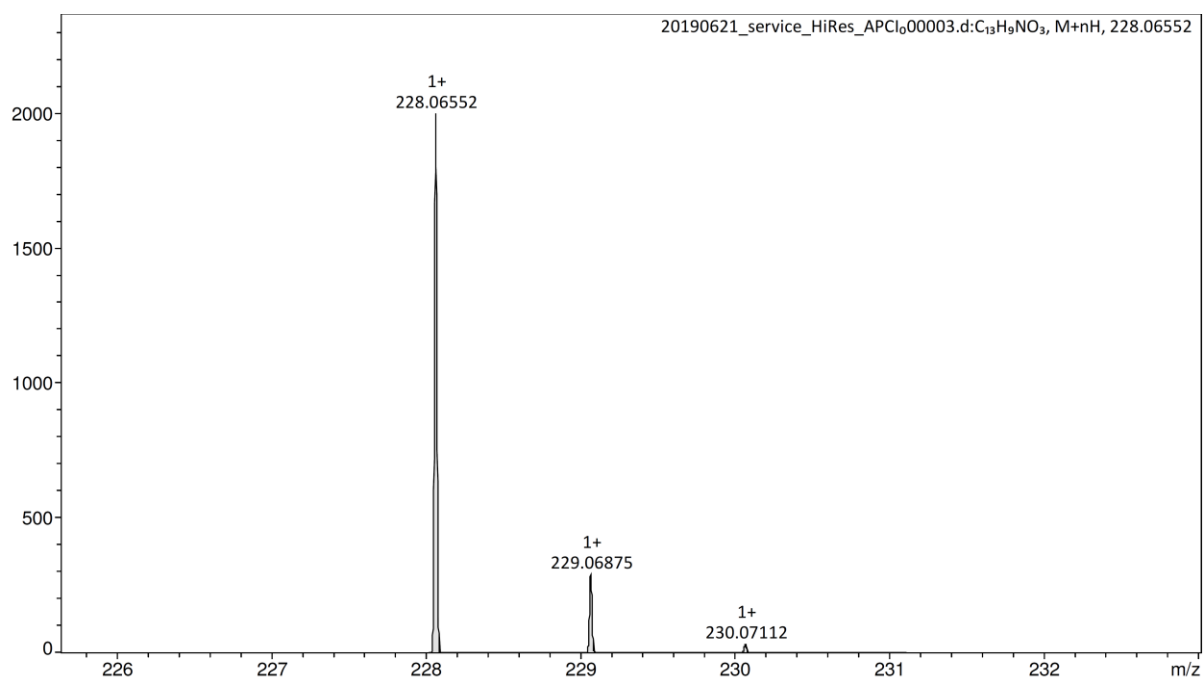

Figure 32. HR-MS (APCI) of 3,6-dioxo-*N*-phenylcyclohexa-1,4-diene-1-carboxamide.

### 3,6-dioxo-N-(p-tolyl)cyclohexa-1,4-diene-1-carboxamide

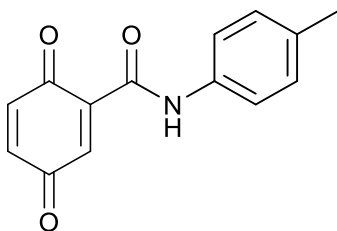

2,5-dihydroxy-N-(p-tolyl)benzamide (0.060 g, 0.25 mmol) and  $\text{Mg}_2\text{SO}_4$  (0.400 g, 2.90 mmol) were suspended in DCM (16 ml). To this suspension was added  $\text{Ag}_2\text{O}$  (0.340 g, 1.48 mmol) and the reaction was left to stir overnight. The day after, the reaction mixture had turned orange in colour and was filtered through celite. The solvent of the subsequent solution was removed on a rotary evaporator to leave a bright red solid (0.031 g, 0.13 mmol, 52%).

**$^1\text{H}$  NMR** (400 MHz,  $\text{CDCl}_3$ )  $\delta$  ppm 10.23 (1 H, s), 7.76 (1 H, s), 7.57 (2 H, d, J 8.4), 7.17 (2 H, d, J 8.2), 6.87 (2 H, s), 2.34 (3 H, s).  **$^{13}\text{C}\{^1\text{H}\}$  NMR** (101 MHz,  $\text{CDCl}_3$ )  $\delta$  ppm 188.7, 187.1, 158.4, 139.7, 137.2, 137.0, 135.2, 134.9, 134.8, 129.7, 120.6, 21.0.

**LR-MS** (APCI)  $m/z$  242.05  $[\text{M}+\text{H}]^+$ ; **HR-MS** (APCI) calcd for  $\text{C}_{13}\text{H}_8\text{NO}_3$  [M]: 241.07389, found  $m/z$  241.07433.



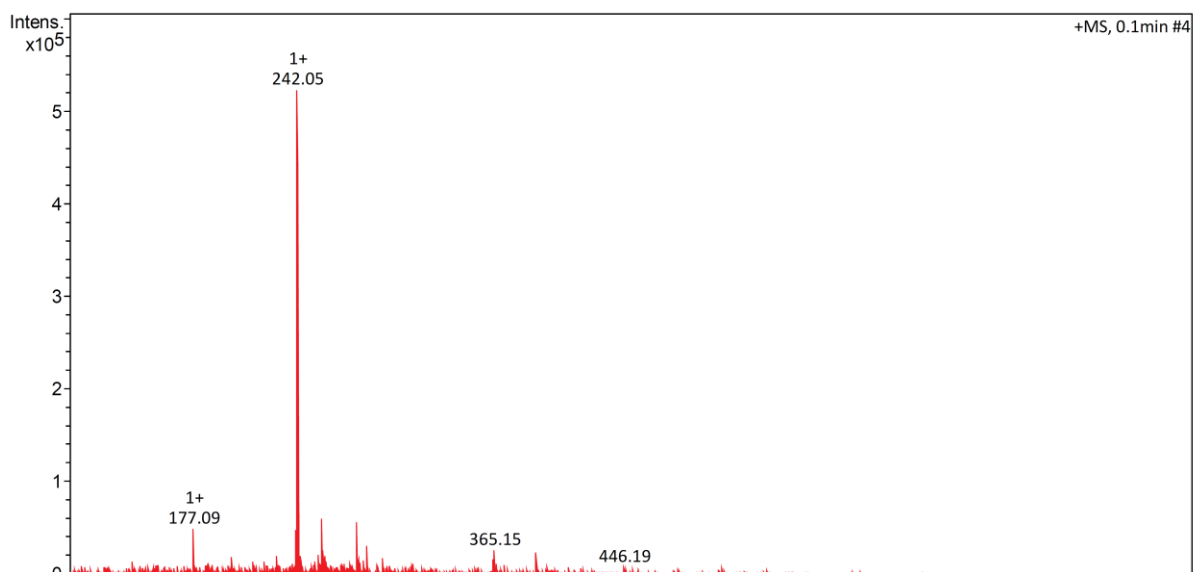

Figure 35. LR-MS (APCI) of 3,6-dioxo-N-(p-tolyl)cyclohexa-1,4-diene-1-carboxamide.

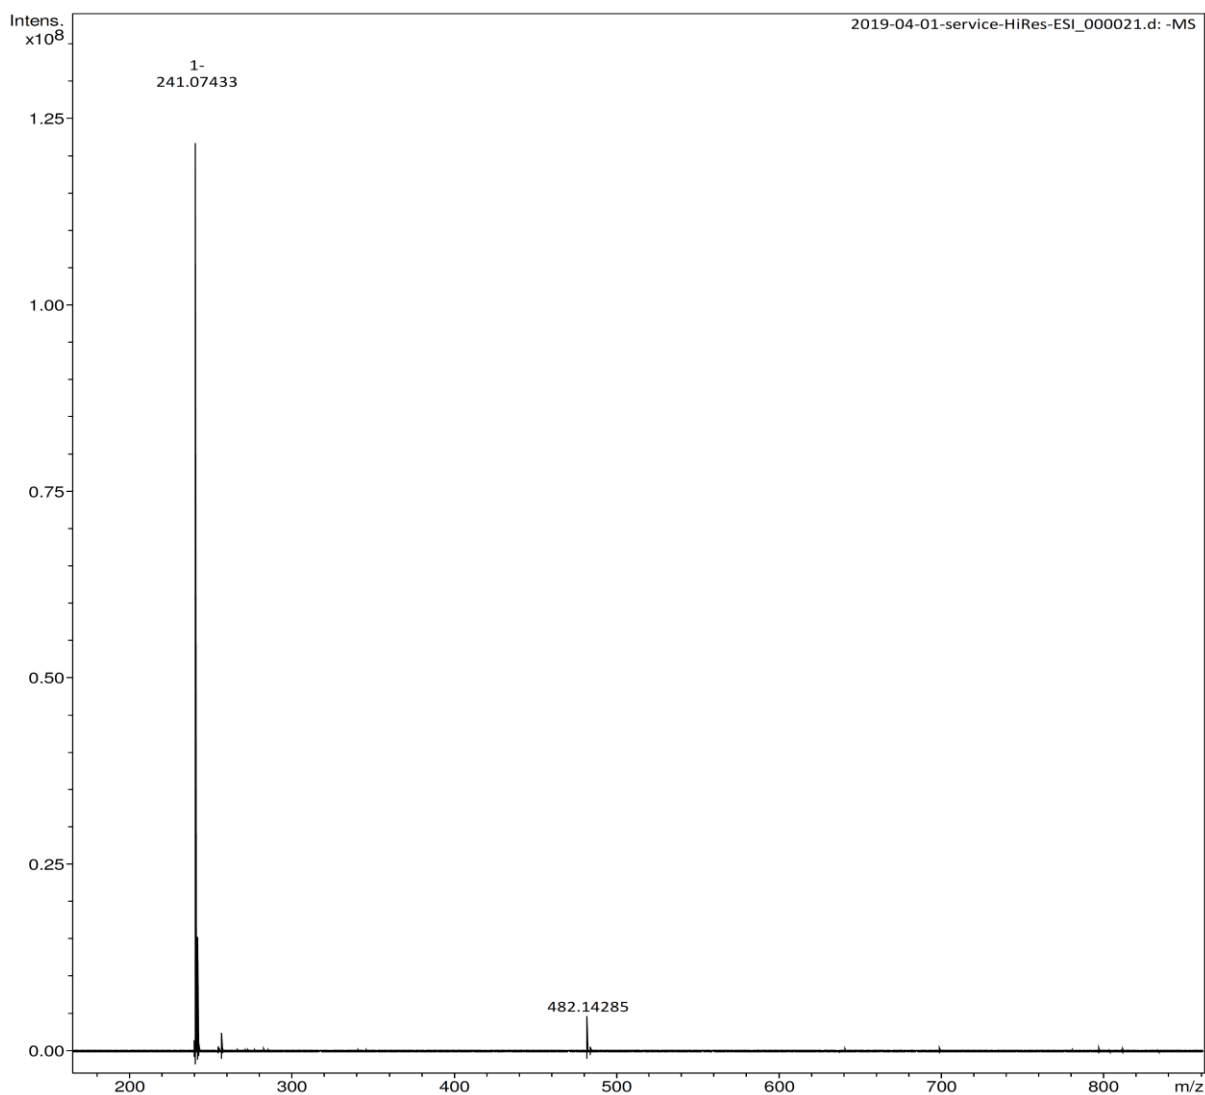

Figure 36. HR-MS (APCI) of 3,6-dioxo-N-(p-tolyl)cyclohexa-1,4-diene-1-carboxamide.

*N*-(4-fluorophenyl)-3,6-dioxocyclohexa-1,4-diene-1-carboxamide

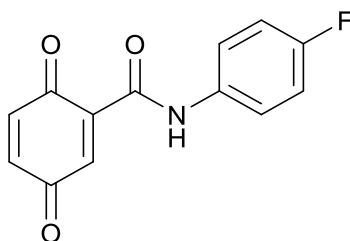

*N*-(4-fluorophenyl)-2,5-dihydroxybenzamide (0.045 g, 0.18 mmol) and  $\text{Mg}_2\text{SO}_4$  (0.176 g, 1.46 mmol) were suspended in DCM (12 ml). To this suspension was added  $\text{Ag}_2\text{O}$  (0.201 g, 0.86 mmol) and the reaction was left to stir overnight. The day after, the reaction mixture had turned orange in colour and was filtered through celite. The solvent of the subsequent solution was removed on a rotary evaporator to leave a red solid (0.039 g, 0.15 mmol, 84%).

**$^1\text{H}$  NMR** (400 MHz,  $\text{DMSO}-d_6$ )  $\delta$  ppm 10.29 (1 H, s), 7.78 (1 H, d,  $J$  1.2), 7.67 (2 H, dd,  $J$  9.0, 4.8), 7.07 (2 H, t,  $J$  8.6), 6.90 (2 H, s);  **$^{13}\text{C}\{^1\text{H}\}$  NMR** (101 MHz,  $\text{CDCl}_3$ )  $\delta$  ppm 188.7 (s), 187.0 (s), 158.5 (s), 138.5 (d,  $J$  279.3), 137.2 (s), 134.7 (s), 133.4 (s), 122.4 (d,  $J$  7.9), 120.0 (s), 115.9 (d,  $J$  22.5).

**LR-MS** (APCI)  $m/z$  245.09 [M]; **HR-MS** (ESI $^-$ ) calcd for  $\text{C}_{13}\text{H}_8\text{FNO}$  [M]: 245.04882, found  $m/z$  245.0930.

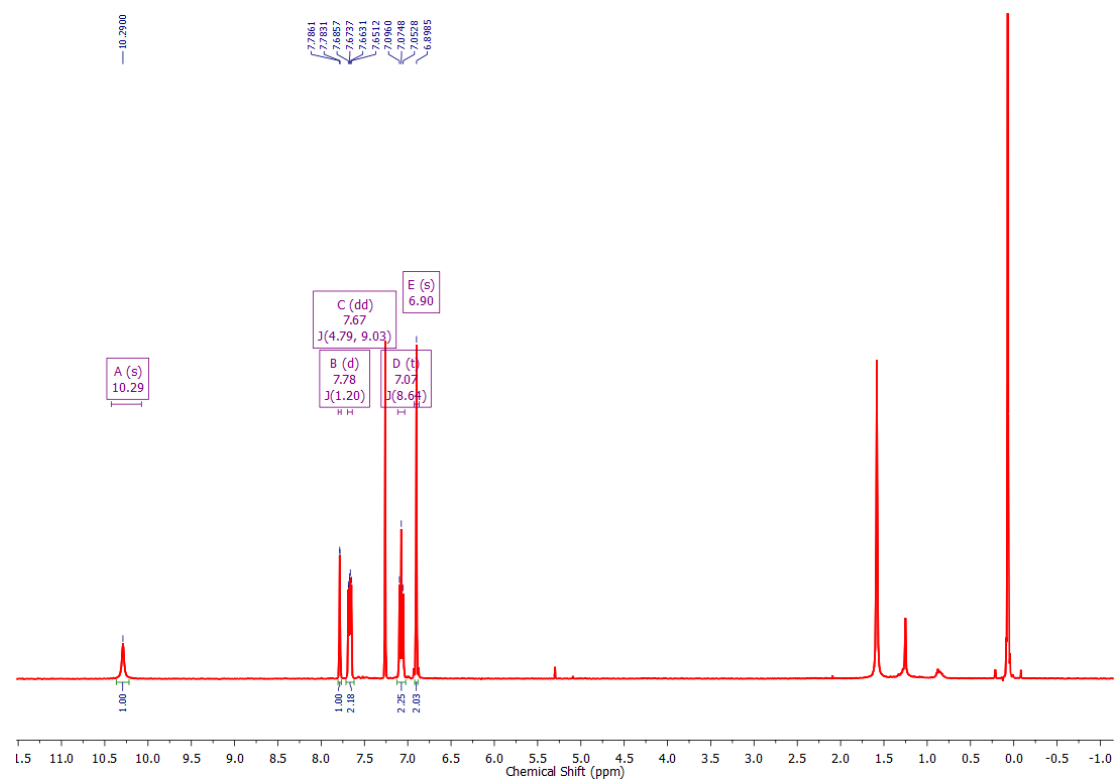

Figure 37. <sup>1</sup>H NMR (400 MHz) spectrum of *N*-(4-fluorophenyl)-3,6-dioxocyclohexa-1,4-diene-1-carboxamide in CDCl<sub>3</sub> at 298 K.

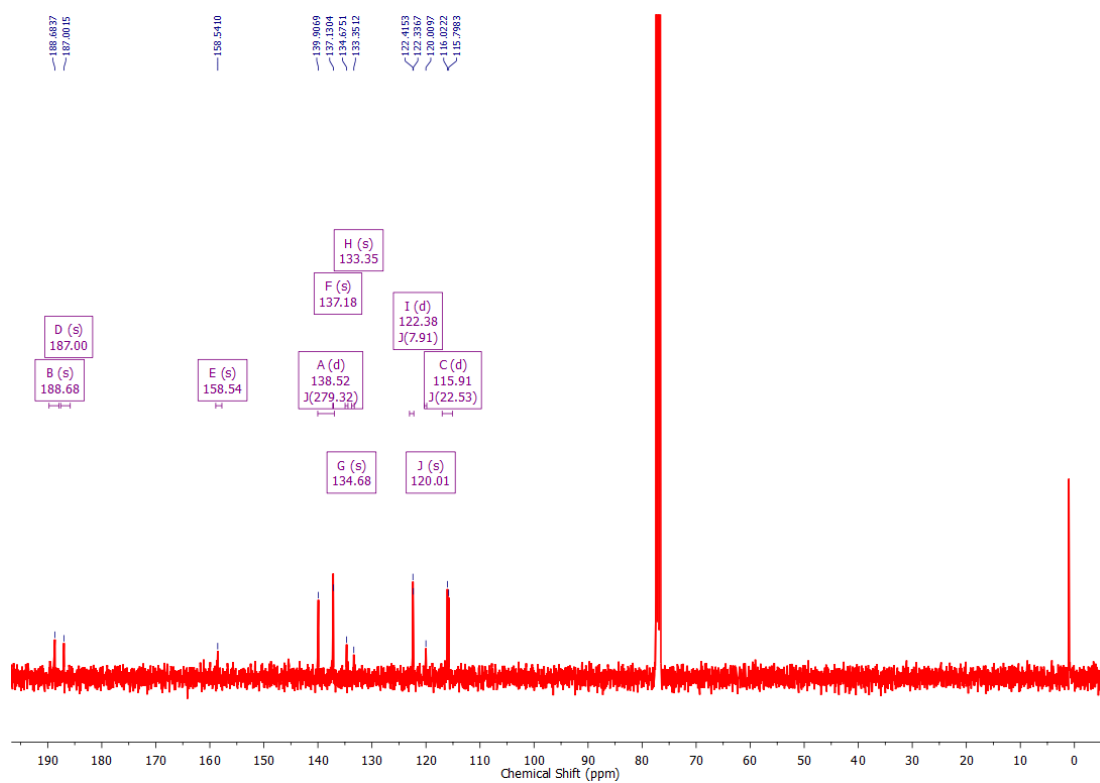

Figure 38. <sup>13</sup>C{<sup>1</sup>H} NMR (101 MHz) spectrum of *N*-(4-fluorophenyl)-3,6-dioxocyclohexa-1,4-diene-1-carboxamide in CDCl<sub>3</sub> at 298 K.

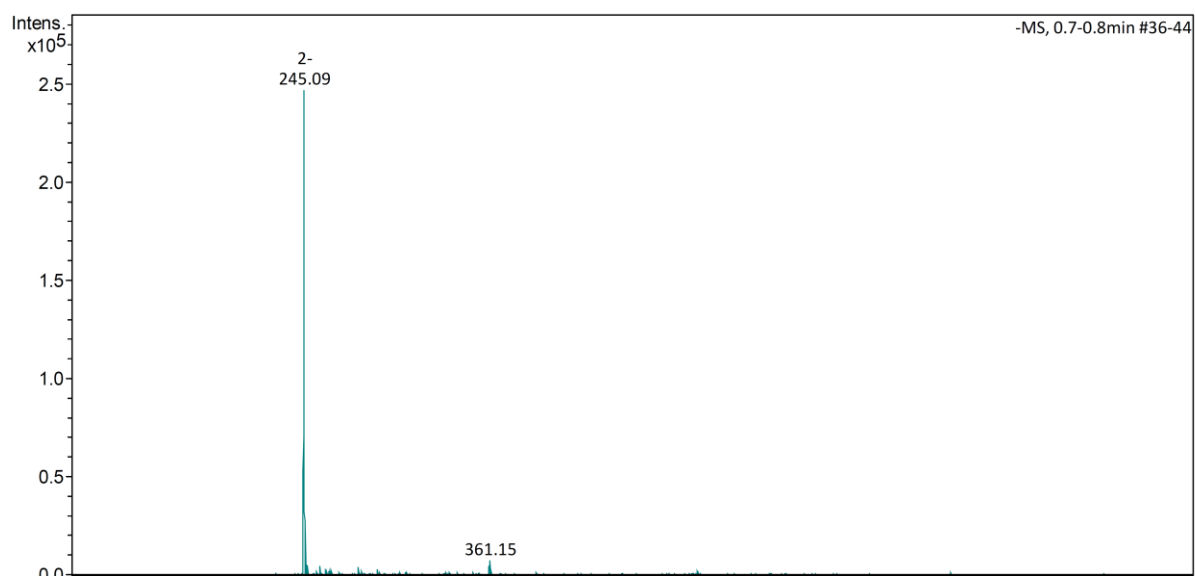

Figure 39. LR-MS (APCI) of *N*-(4-fluorophenyl)-3,6-dioxocyclohexa-1,4-diene-1-carboxamide.

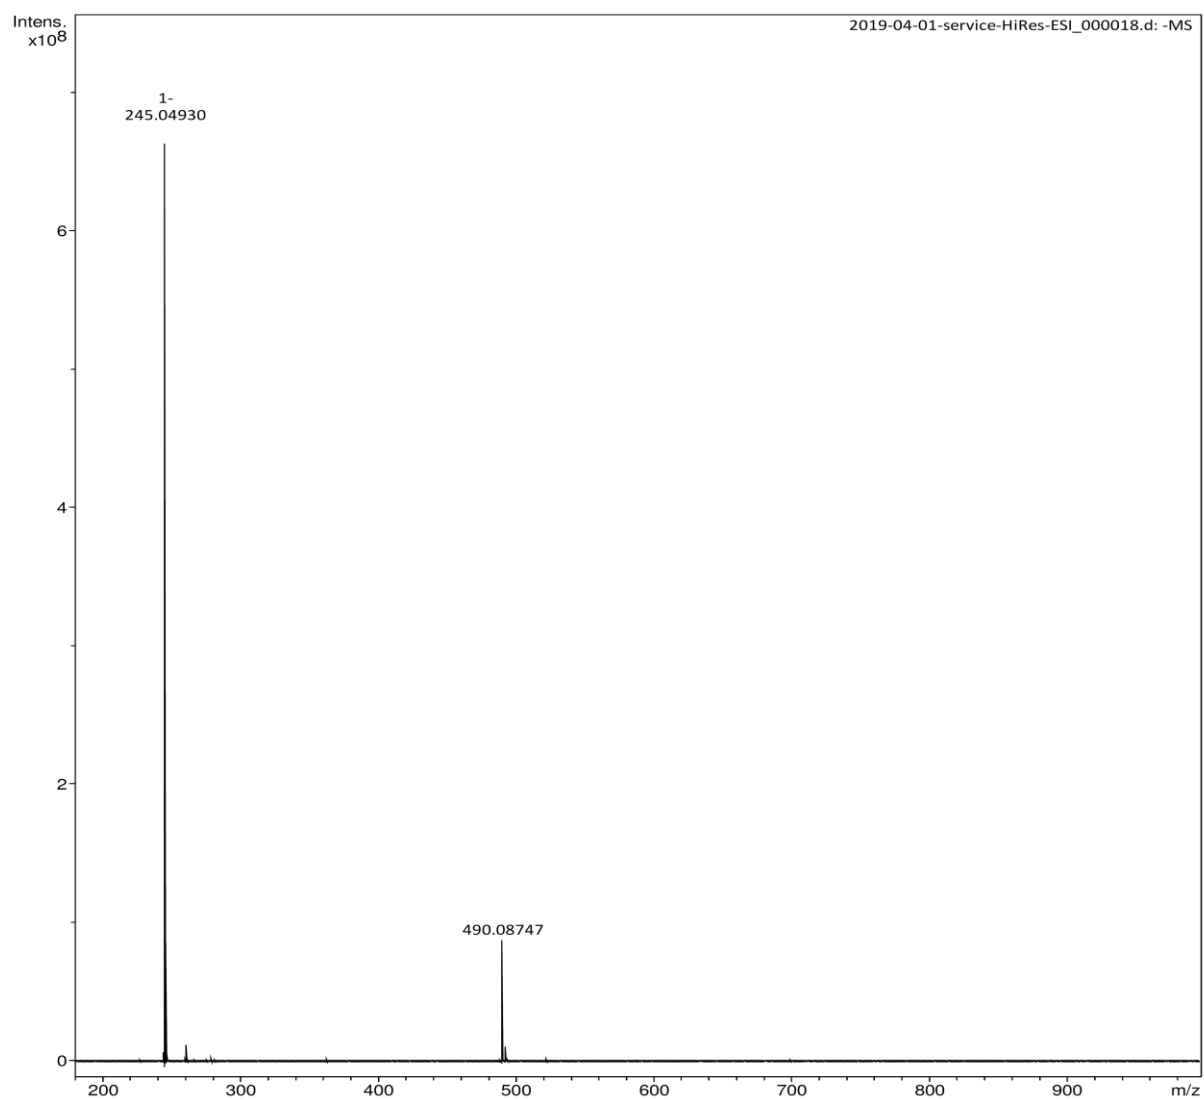

Figure 40. HR-MS (APCI) of *N*-(4-fluorophenyl)-3,6-dioxocyclohexa-1,4-diene-1-carboxamide.

*N*-(3,5-bis(trifluoromethyl)phenyl)-3,6-dioxocyclohexa-1,4-diene-1-carboxamide

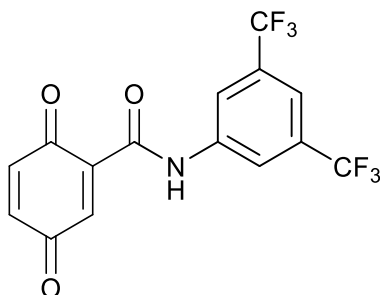

*N*-(3,5-bis(trifluoromethyl)phenyl)-2,5-dihydroxybenzamide (0.042 g, 0.12 mmol) and  $\text{Mg}_2\text{SO}_4$  (0.200 g, 1.66 mmol) were suspended in DCM (12 ml). To this suspension was added  $\text{Ag}_2\text{O}$  (0.200 g, 0.86 mmol) and the reaction was left to stir overnight. The day after, the reaction mixture had turned orange in colour and was filtered through celite. The solvent of the subsequent solution was removed on a rotary evaporator to leave a bright red solid (0.040 g, 0.11 mmol, 96%).

$^1\text{H NMR}$  (400 MHz,  $\text{CDCl}_3$ )  $\delta$  ppm 10.67 (1 H, s), 8.20 (2 H, s), 7.79 (1 H, m), 7.68 (1 H, s), 6.95 (2 H, d,  $J$  1.1);  $^{13}\text{C}\{^1\text{H}\}$  NMR (101 MHz,  $\text{CDCl}_3$ )  $\delta$  ppm 188.7 (s), 186.7 (s), 159.4 (s), 140.7 (s), 138.7 (s), 137.5 (s), 137.2 (s), 134.0 (s), 132.7 (q,  $J$  33.8), 123.1 (q,  $J$  272.8), 120.5 (d,  $J$  3.0), 118.7 (s).

**LR-MS** (APCI)  $m/z$  364.03  $[\text{M} + \text{H}]^+$ ; **HR-MS** (APCI) calcd for  $\text{C}_{15}\text{H}_7\text{F}_6\text{NO}_3$   $[\text{M}]$ :363.21542, found  $m/z$  363.03330.

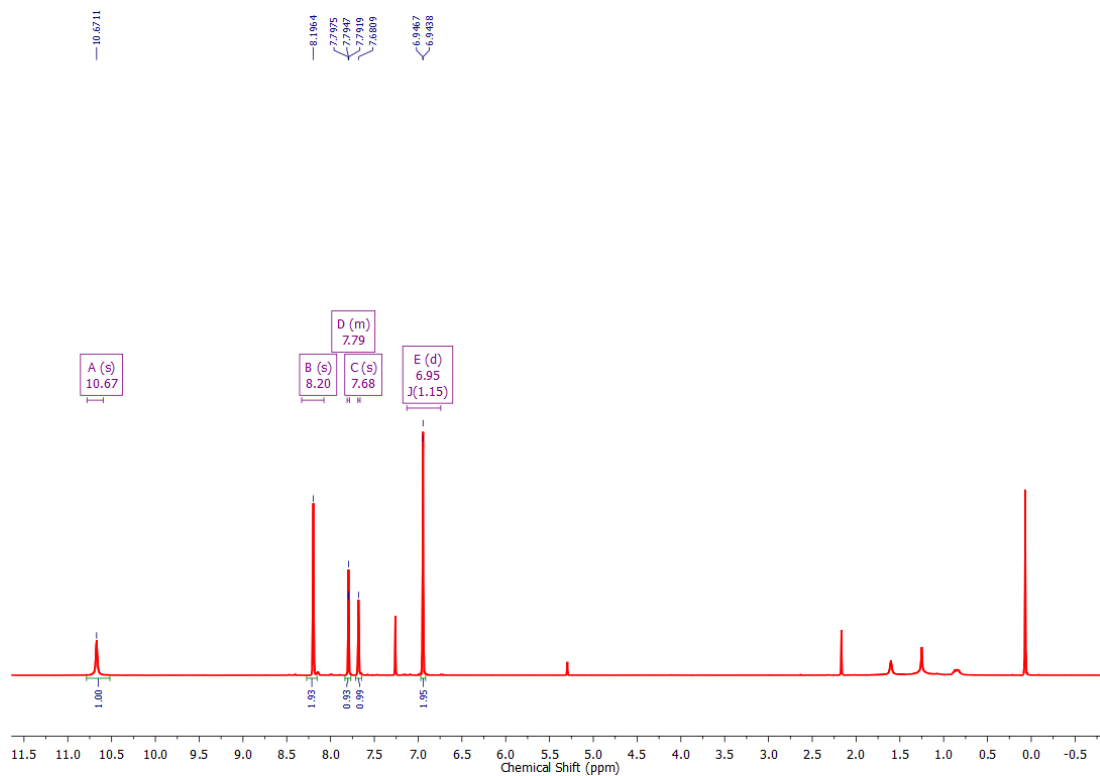

Figure 41.  $^1\text{H}$  NMR (400 MHz) spectrum of N-(3,5-bis(trifluoromethyl)phenyl)-3,6-dioxocyclohexa-1,4-diene-1-carboxamide in  $\text{CDCl}_3$  at 298 K.

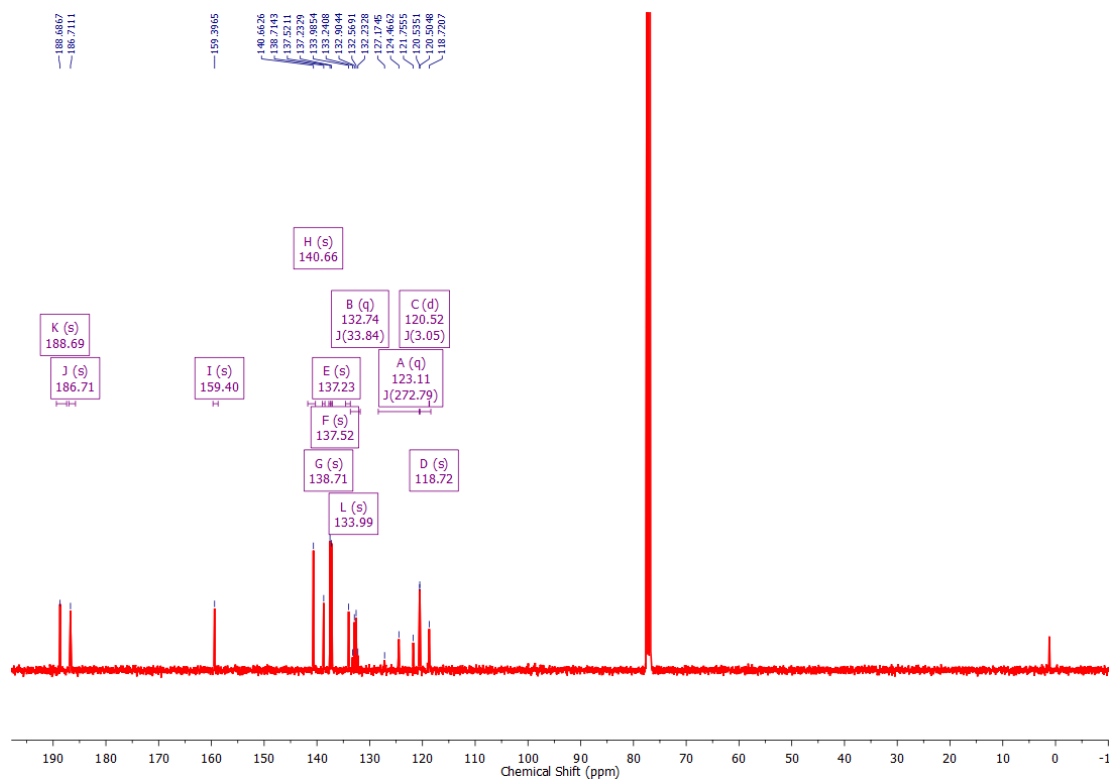

Figure 42.  $^{13}\text{C}\{^1\text{H}\}$  NMR (101 MHz) spectrum of N-(3,5-bis(trifluoromethyl)phenyl)-3,6-dioxocyclohexa-1,4-diene-1-carboxamide in  $\text{CDCl}_3$  at 298 K.

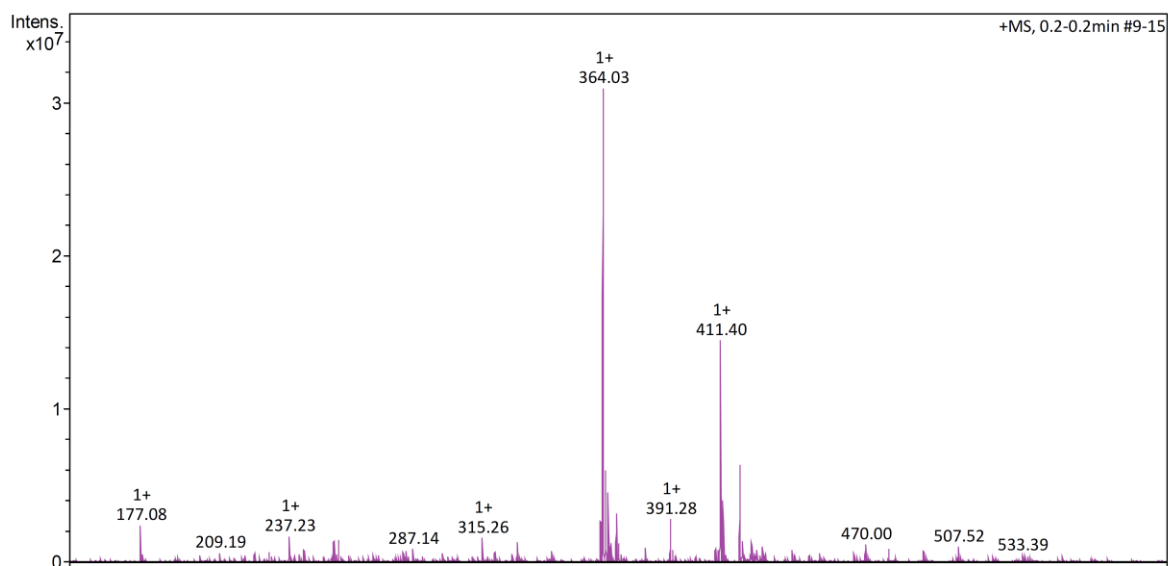

Figure 43. LR-MS (APCI) of N-(3,5-bis(trifluoromethyl)phenyl)-3,6-dioxocyclohexa-1,4-diene-1-carboxamide.

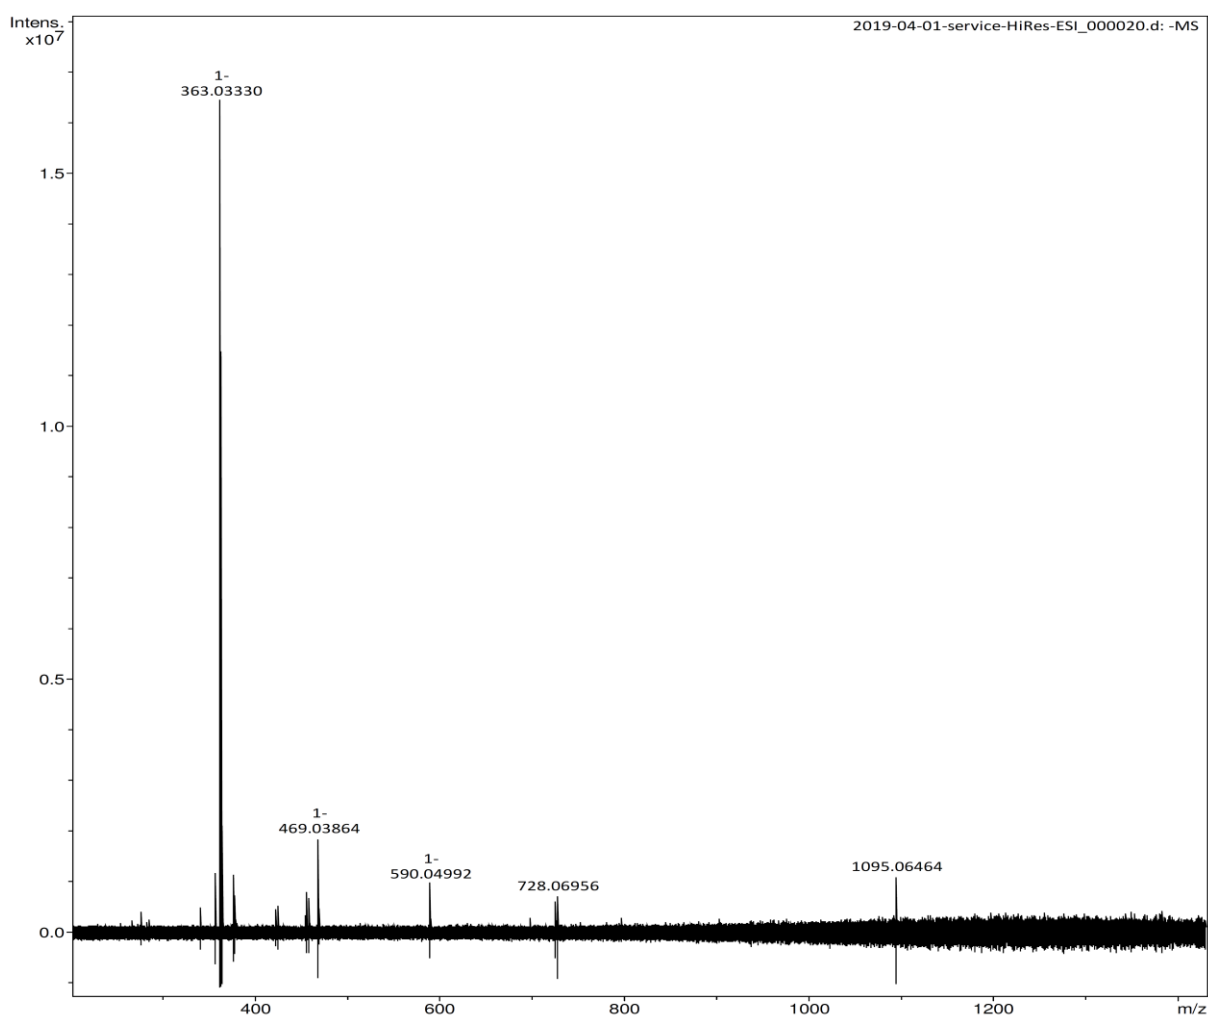

Figure 44. HR-MS (APCI) of N-(3,5-bis(trifluoromethyl)phenyl)-3,6-dioxocyclohexa-1,4-diene-1-carboxamide.

## 2. Crystal Structures

Single crystals were obtained from slow evaporation from a saturated acetonitrile solution containing the respective free receptors only. A suitable crystal was selected and [in a film of paratone on a micromount] on a SuperNova, Dual, Cu at home/near, Atlas diffractometer. The crystal was kept at 100(2) K during data collection. Using Olex2 [1], the structure was solved with the olex2.solve [2] structure solution program using Charge Flipping and refined with the ShelXL [3] refinement package using Least Squares minimisation.

1. Dolomanov, O.V., Bourhis, L.J., Gildea, R.J, Howard, J.A.K. & Puschmann, H. (2009), J. Appl. Cryst. 42, 339-341.
2. Bourhis, L.J., Dolomanov, O.V., Gildea, R.J., Howard, J.A.K., Puschmann, H. (2015). Acta Cryst. A71, 59-75.
3. Sheldrick, G.M. (2015). Acta Cryst. C71, 3-8.

### 2.1 Crystal Data for *N*-(4-fluorophenyl)-2,5-dimethoxybenzamide:

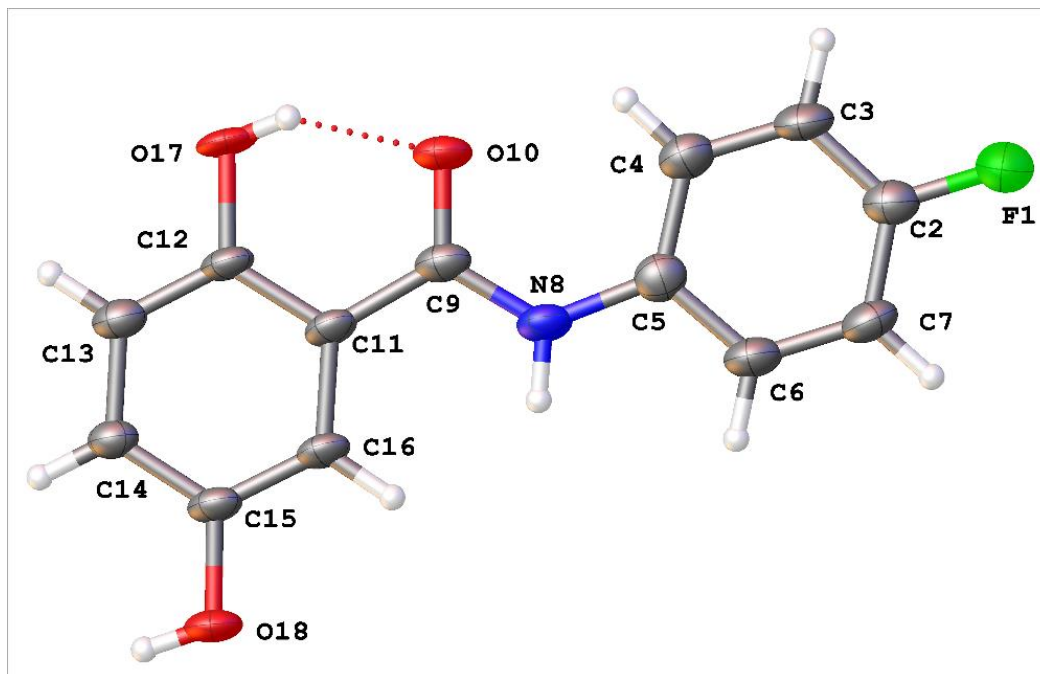

**Table 2.1.1** Crystal data and structure refinement for *N*-(4-fluorophenyl)-2,5-dimethoxybenzamide.

|                                             |                                                          |
|---------------------------------------------|----------------------------------------------------------|
| Identification code                         | pag19_s1731                                              |
| Empirical formula                           | C <sub>13</sub> H <sub>10</sub> FNO <sub>3</sub>         |
| Formula weight                              | 247.22                                                   |
| Temperature/K                               | 100(2)                                                   |
| Crystal system                              | tetragonal                                               |
| Space group                                 | I4 <sub>1</sub> /a                                       |
| a/Å                                         | 13.4738(10)                                              |
| b/Å                                         | 13.4738(10)                                              |
| c/Å                                         | 23.638(2)                                                |
| α/°                                         | 90                                                       |
| β/°                                         | 90                                                       |
| γ/°                                         | 90                                                       |
| Volume/Å <sup>3</sup>                       | 4291.3(7)                                                |
| Z                                           | 16                                                       |
| ρ <sub>calc</sub> /cm <sup>3</sup>          | 1.531                                                    |
| μ/mm <sup>-1</sup>                          | 0.121                                                    |
| F(000)                                      | 2048.0                                                   |
| Crystal size/mm <sup>3</sup>                | 0.195 × 0.166 × 0.158                                    |
| Radiation                                   | MoKα (λ = 0.71073)                                       |
| 2θ range for data collection/°              | 3.48 to 55.326                                           |
| Index ranges                                | -12 ≤ h ≤ 12, 0 ≤ k ≤ 17, -30 ≤ l ≤ 30                   |
| Reflections collected                       | 2498                                                     |
| Independent reflections                     | 2498 [R <sub>int</sub> = ?, R <sub>sigma</sub> = 0.0725] |
| Data/restraints/parameters                  | 2498/429/331                                             |
| Goodness-of-fit on F <sup>2</sup>           | 1.093                                                    |
| Final R indexes [I ≥ 2σ (I)]                | R <sub>1</sub> = 0.1039, wR <sub>2</sub> = 0.2745        |
| Final R indexes [all data]                  | R <sub>1</sub> = 0.1394, wR <sub>2</sub> = 0.3040        |
| Largest diff. peak/hole / e Å <sup>-3</sup> | 0.63/-0.35                                               |

**Table 2.1.2** Fractional Atomic Coordinates ( $\times 10^4$ ) and Equivalent Isotropic Displacement Parameters ( $\text{\AA}^2 \times 10^3$ ) for *N*-(4-fluorophenyl)-2,5-dimethoxybenzamide.  $U_{\text{eq}}$  is defined as 1/3 of the trace of the orthogonalised  $U_{\text{H}}$  tensor.

| Atom | <i>x</i>  | <i>y</i>  | <i>z</i>   | $U(\text{eq})$ |
|------|-----------|-----------|------------|----------------|
| F1   | 4412(3)   | 3767(3)   | 4679.7(15) | 51.4(10)       |
| O10  | 9077(3)   | 3640(3)   | 4130.1(15) | 42.3(11)       |
| O17  | 10875(3)  | 3800(3)   | 3892.8(14) | 41.8(11)       |
| O18  | 11721(3)  | 3810(3)   | 6177.5(15) | 41.4(10)       |
| N8   | 8487(4)   | 3699(4)   | 5024(2)    | 35.6(11)       |
| C2   | 5411(5)   | 3737(5)   | 4749(3)    | 39.3(13)       |
| C3   | 6019(5)   | 3707(5)   | 4291(2)    | 41.8(14)       |
| C4   | 7046(5)   | 3675(5)   | 4355(2)    | 40.4(13)       |
| C5   | 7449(5)   | 3697(6)   | 4907(3)    | 35.2(13)       |
| C6   | 6800(6)   | 3730(20)  | 5365(3)    | 41.2(16)       |
| C7   | 5775(6)   | 3745(9)   | 5294(3)    | 40.9(15)       |
| C9   | 9244(4)   | 3689(4)   | 4650(2)    | 34.2(11)       |
| C11  | 10282(4)  | 3737(4)   | 4863(2)    | 31.0(11)       |
| C12  | 11053(4)  | 3786(4)   | 4469(2)    | 31.9(12)       |
| C13  | 12038(5)  | 3820(4)   | 4641(2)    | 35.4(12)       |
| C14  | 12277(4)  | 3835(4)   | 5206(2)    | 32.1(11)       |
| C15  | 11523(5)  | 3792(4)   | 5604(2)    | 32.8(12)       |
| C16  | 10533(5)  | 3742(4)   | 5440(2)    | 31.6(12)       |
| F1A  | 18139(18) | 3680(18)  | 4740(14)   | 58(6)          |
| O10A | 13510(20) | 3960(20)  | 4154(8)    | 52(6)          |
| O17A | 11690(20) | 3980(20)  | 3902(8)    | 43(6)          |
| O18A | 10790(20) | 3680(20)  | 6164(9)    | 55(7)          |
| N8A  | 14099(15) | 3750(20)  | 5055(10)   | 40(5)          |
| C2A  | 17140(20) | 3700(50)  | 4801(16)   | 51(6)          |
| C3A  | 16540(20) | 3730(40)  | 4342(14)   | 52(6)          |
| C4A  | 15520(20) | 3780(30)  | 4414(14)   | 50(6)          |
| C5A  | 15142(17) | 3730(30)  | 4975(14)   | 48(5)          |
| C6A  | 15770(20) | 3770(60)  | 5438(14)   | 49(6)          |
| C7A  | 16800(20) | 3750(120) | 5355(16)   | 50(7)          |
| C9A  | 13352(15) | 3820(30)  | 4669(9)    | 40(5)          |
| C11A | 12293(16) | 3830(30)  | 4871(10)   | 38(5)          |
| C12A | 11529(18) | 3830(30)  | 4471(9)    | 37(5)          |
| C13A | 10529(19) | 3820(30)  | 4630(12)   | 36(5)          |
| C14A | 10280(20) | 3720(30)  | 5183(12)   | 37(5)          |
| C15A | 11010(20) | 3780(30)  | 5593(9)    | 39(5)          |
| C16A | 12000(20) | 3780(30)  | 5437(10)   | 37(5)          |

**Table 2.1.3** Anisotropic Displacement Parameters ( $\text{\AA}^2 \times 10^3$ ) for *N*-(4-fluorophenyl)-2,5-dimethoxybenzamide. The Anisotropic displacement factor exponent takes the form:  $-2\pi^2[h^2a^{*2}U_{11}+2hka^*b^*U_{12}+\dots]$ .

| Atom | U <sub>11</sub> | U <sub>22</sub> | U <sub>33</sub> | U <sub>23</sub> | U <sub>13</sub> | U <sub>12</sub> |
|------|-----------------|-----------------|-----------------|-----------------|-----------------|-----------------|
| F1   | 46(2)           | 72(3)           | 36.6(19)        | -1.5(18)        | -3.3(15)        | -0.7(18)        |
| O10  | 49(2)           | 61(3)           | 17.4(16)        | 6.5(16)         | -4.0(15)        | -2(2)           |
| O17  | 54(3)           | 61(3)           | 10.6(15)        | 7.4(16)         | 2.0(15)         | 0(2)            |
| O18  | 47(2)           | 62(3)           | 15.1(16)        | 3.7(16)         | -3.1(15)        | 0(2)            |
| N8   | 43(3)           | 44(3)           | 20(2)           | 6.5(19)         | -0.4(18)        | -1(2)           |
| C2   | 45(3)           | 44(3)           | 28(3)           | 0(3)            | -2(2)           | 0(3)            |
| C3   | 52(4)           | 54(4)           | 20(2)           | -1(2)           | -1(2)           | 0(3)            |
| C4   | 45(3)           | 47(3)           | 29(3)           | 5(2)            | 4(2)            | -1(3)           |
| C5   | 39(3)           | 33(3)           | 33(3)           | 4(2)            | 2(2)            | -1(3)           |
| C6   | 48(3)           | 53(4)           | 22(3)           | 3(3)            | 0(2)            | -1(3)           |
| C7   | 48(3)           | 52(4)           | 23(3)           | 0(3)            | 7(2)            | 1(3)            |
| C9   | 46(3)           | 36(3)           | 20(2)           | 4.7(19)         | 0.6(19)         | 3(2)            |
| C11  | 40(3)           | 35(3)           | 18(2)           | 7(2)            | 5.0(19)         | 2(2)            |
| C12  | 42(3)           | 38(3)           | 15(2)           | 4.4(19)         | 3(2)            | 3(3)            |
| C13  | 44(3)           | 40(3)           | 22(2)           | 2(2)            | 2(2)            | 2(3)            |
| C14  | 37(3)           | 38(3)           | 21(2)           | 2(2)            | 0(2)            | 2(2)            |
| C15  | 44(3)           | 38(3)           | 17(2)           | 4.9(19)         | 1(2)            | 5(3)            |
| C16  | 42(3)           | 36(3)           | 16(2)           | 6(2)            | 2.8(19)         | 1(2)            |
| F1A  | 52(11)          | 38(12)          | 84(16)          | -7(12)          | 16(10)          | -6(9)           |
| O10A | 78(15)          | 48(13)          | 30(8)           | 2(9)            | 14(8)           | -7(12)          |
| O17A | 51(13)          | 60(14)          | 19(8)           | -1(8)           | 1(8)            | -4(12)          |
| O18A | 76(16)          | 61(14)          | 27(9)           | 16(10)          | 10(9)           | 14(13)          |
| N8A  | 59(9)           | 34(9)           | 26(8)           | -3(7)           | 12(7)           | -19(8)          |
| C2A  | 54(11)          | 42(12)          | 57(12)          | -9(10)          | 16(9)           | -13(10)         |
| C3A  | 55(11)          | 48(12)          | 53(12)          | -5(10)          | 17(9)           | -17(11)         |
| C4A  | 56(11)          | 47(11)          | 48(11)          | -5(10)          | 18(9)           | -19(10)         |
| C5A  | 58(9)           | 40(10)          | 44(10)          | -4(9)           | 12(8)           | -21(8)          |
| C6A  | 55(10)          | 41(12)          | 51(11)          | -6(11)          | 11(8)           | -20(10)         |
| C7A  | 55(11)          | 40(13)          | 55(12)          | -8(11)          | 12(9)           | -17(11)         |
| C9A  | 59(9)           | 34(9)           | 27(7)           | -4(7)           | 9(6)            | -13(8)          |
| C11A | 54(9)           | 37(9)           | 23(8)           | -2(8)           | 3(6)            | -10(8)          |
| C12A | 50(10)          | 39(10)          | 21(8)           | -5(7)           | 5(7)            | -11(9)          |
| C13A | 50(10)          | 36(10)          | 20(9)           | -9(9)           | 6(7)            | -10(9)          |
| C14A | 46(10)          | 42(11)          | 23(9)           | -2(9)           | 5(7)            | -8(9)           |
| C15A | 49(11)          | 43(10)          | 24(8)           | 2(8)            | 2(7)            | -6(9)           |
| C16A | 50(10)          | 40(10)          | 22(8)           | 0(8)            | -1(7)           | -8(9)           |

**Table 2.1.4** Bond Lengths for *N*-(4-fluorophenyl)-2,5-dimethoxybenzamide.

| Atom | Atom | Length/Å  | Atom | Atom | Length/Å  |
|------|------|-----------|------|------|-----------|
| F1   | C2   | 1.357(7)  | F1A  | C2A  | 1.36(2)   |
| O10  | C9   | 1.252(6)  | O10A | C9A  | 1.252(18) |
| O17  | C12  | 1.383(6)  | O17A | C12A | 1.381(18) |
| O18  | C15  | 1.381(6)  | O18A | C15A | 1.386(18) |
| N8   | C5   | 1.425(8)  | N8A  | C5A  | 1.417(19) |
| N8   | C9   | 1.349(7)  | N8A  | C9A  | 1.362(18) |
| C2   | C3   | 1.359(9)  | C2A  | C3A  | 1.35(2)   |
| C2   | C7   | 1.378(8)  | C2A  | C7A  | 1.39(2)   |
| C3   | C4   | 1.393(10) | C3A  | C4A  | 1.39(2)   |
| C4   | C5   | 1.412(8)  | C4A  | C5A  | 1.42(2)   |
| C5   | C6   | 1.393(9)  | C5A  | C6A  | 1.39(2)   |
| C6   | C7   | 1.392(9)  | C6A  | C7A  | 1.398(19) |
| C9   | C11  | 1.489(8)  | C9A  | C11A | 1.504(19) |
| C11  | C12  | 1.396(7)  | C11A | C12A | 1.397(18) |
| C11  | C16  | 1.406(7)  | C11A | C16A | 1.395(19) |
| C12  | C13  | 1.390(9)  | C12A | C13A | 1.40(2)   |
| C13  | C14  | 1.374(7)  | C13A | C14A | 1.358(19) |
| C14  | C15  | 1.386(8)  | C14A | C15A | 1.385(19) |
| C15  | C16  | 1.391(9)  | C15A | C16A | 1.39(2)   |

**Table 2.1.5** Bond Angles for *N*-(4-fluorophenyl)-2,5-dimethoxybenzamide.

| Atom | Atom | Atom | Angle/°  | Atom | Atom | Atom | Angle/°   |
|------|------|------|----------|------|------|------|-----------|
| C9   | N8   | C5   | 128.0(5) | C9A  | N8A  | C5A  | 130(2)    |
| F1   | C2   | C3   | 120.1(6) | F1A  | C2A  | C7A  | 115(2)    |
| F1   | C2   | C7   | 117.8(6) | C3A  | C2A  | F1A  | 120(2)    |
| C3   | C2   | C7   | 122.1(6) | C3A  | C2A  | C7A  | 124(2)    |
| C2   | C3   | C4   | 120.8(5) | C2A  | C3A  | C4A  | 120(2)    |
| C3   | C4   | C5   | 118.9(5) | C3A  | C4A  | C5A  | 118(2)    |
| C4   | C5   | N8   | 123.8(6) | N8A  | C5A  | C4A  | 118(2)    |
| C6   | C5   | N8   | 117.7(5) | C6A  | C5A  | N8A  | 120(2)    |
| C6   | C5   | C4   | 118.5(6) | C6A  | C5A  | C4A  | 121(2)    |
| C7   | C6   | C5   | 122.0(7) | C5A  | C6A  | C7A  | 120(3)    |
| C2   | C7   | C6   | 117.7(6) | C2A  | C7A  | C6A  | 117(3)    |
| O10  | C9   | N8   | 120.5(5) | O10A | C9A  | N8A  | 122(2)    |
| O10  | C9   | C11  | 120.2(5) | O10A | C9A  | C11A | 118(2)    |
| N8   | C9   | C11  | 119.3(5) | N8A  | C9A  | C11A | 119.3(17) |
| C12  | C11  | C9   | 118.4(5) | C12A | C11A | C9A  | 119.0(18) |
| C12  | C11  | C16  | 118.0(5) | C16A | C11A | C9A  | 124.8(19) |
| C16  | C11  | C9   | 123.6(5) | C16A | C11A | C12A | 116.1(17) |
| O17  | C12  | C11  | 121.9(5) | O17A | C12A | C11A | 123(2)    |
| O17  | C12  | C13  | 116.9(5) | O17A | C12A | C13A | 115(2)    |
| C13  | C12  | C11  | 121.1(5) | C11A | C12A | C13A | 121.9(18) |
| C14  | C13  | C12  | 120.6(5) | C14A | C13A | C12A | 120(2)    |
| C13  | C14  | C15  | 119.2(5) | C13A | C14A | C15A | 119(2)    |
| O18  | C15  | C14  | 121.7(5) | O18A | C15A | C16A | 117(2)    |
| O18  | C15  | C16  | 117.3(5) | C14A | C15A | O18A | 122(2)    |
| C14  | C15  | C16  | 121.0(5) | C14A | C15A | C16A | 120.1(19) |
| C15  | C16  | C11  | 120.0(5) | C15A | C16A | C11A | 122(2)    |

**Table 2.1.6** Hydrogen Bonds for *N*-(4-fluorophenyl)-2,5-dimethoxybenzamide.

| D    | H    | A                 | d(D-H)/Å | d(H-A)/Å | d(D-A)/Å | D-H-A/° |
|------|------|-------------------|----------|----------|----------|---------|
| O17  | H17  | O10               | 0.84     | 1.81     | 2.496(6) | 137.4   |
| O18  | H18  | O17 <sup>1</sup>  | 0.84     | 1.97     | 2.778(6) | 160.8   |
| N8   | H8   | O18 <sup>2</sup>  | 0.88     | 2.33     | 3.162(6) | 158.8   |
| O17A | H17A | O10A              | 0.84     | 1.79     | 2.52(4)  | 144.5   |
| O18A | H18A | O18A <sup>2</sup> | 0.84     | 1.92     | 2.75(5)  | 166.4   |
| N8A  | H8A  | O17A <sup>1</sup> | 0.88     | 2.48     | 3.33(3)  | 161.9   |

<sup>1</sup>7/4-Y,-3/4+X,1/4+Z; <sup>2</sup>5/4-Y,-3/4+X,5/4-Z

**Table 2.1.7** Torsion Angles for *N*-(4-fluorophenyl)-2,5-dimethoxybenzamide.

| A   | B   | C   | D   | Angle/°    | A    | B    | C    | D    | Angle/° |
|-----|-----|-----|-----|------------|------|------|------|------|---------|
| F1  | C2  | C3  | C4  | -180.0(6)  | F1A  | C2A  | C3A  | C4A  | -178(5) |
| F1  | C2  | C7  | C6  | -179.1(14) | F1A  | C2A  | C7A  | C6A  | 180(9)  |
| O10 | C9  | C11 | C12 | 3.7(8)     | O10A | C9A  | C11A | C12A | 11(6)   |
| O10 | C9  | C11 | C16 | -176.7(5)  | O10A | C9A  | C11A | C16A | -173(4) |
| O17 | C12 | C13 | C14 | 178.3(5)   | O17A | C12A | C13A | C14A | -177(4) |
| O18 | C15 | C16 | C11 | 179.0(5)   | O18A | C15A | C16A | C11A | 177(4)  |
| N8  | C5  | C6  | C7  | 179.0(16)  | N8A  | C5A  | C6A  | C7A  | -180(9) |
| N8  | C9  | C11 | C12 | -176.2(5)  | N8A  | C9A  | C11A | C12A | -176(4) |
| N8  | C9  | C11 | C16 | 3.4(8)     | N8A  | C9A  | C11A | C16A | 0(6)    |
| C2  | C3  | C4  | C5  | -1.4(10)   | C2A  | C3A  | C4A  | C5A  | -4(8)   |
| C3  | C2  | C7  | C6  | 0.4(18)    | C3A  | C2A  | C7A  | C6A  | 5(18)   |
| C3  | C4  | C5  | N8  | -178.0(6)  | C3A  | C4A  | C5A  | N8A  | -179(4) |
| C3  | C4  | C5  | C6  | 1.3(16)    | C3A  | C4A  | C5A  | C6A  | 9(8)    |
| C4  | C5  | C6  | C7  | 0(3)       | C4A  | C5A  | C6A  | C7A  | -8(12)  |
| C5  | N8  | C9  | O10 | -2.5(9)    | C5A  | N8A  | C9A  | O10A | -7(6)   |
| C5  | N8  | C9  | C11 | 177.4(6)   | C5A  | N8A  | C9A  | C11A | 180(4)  |
| C5  | C6  | C7  | C2  | -1(3)      | C5A  | C6A  | C7A  | C2A  | 1(17)   |
| C7  | C2  | C3  | C4  | 0.6(11)    | C7A  | C2A  | C3A  | C4A  | -3(12)  |
| C9  | N8  | C5  | C4  | 0.5(11)    | C9A  | N8A  | C5A  | C4A  | 1(6)    |
| C9  | N8  | C5  | C6  | -178.8(14) | C9A  | N8A  | C5A  | C6A  | 173(5)  |
| C9  | C11 | C12 | O17 | 0.7(8)     | C9A  | C11A | C12A | O17A | -11(6)  |
| C9  | C11 | C12 | C13 | -179.2(5)  | C9A  | C11A | C12A | C13A | 179(4)  |
| C9  | C11 | C16 | C15 | -179.8(5)  | C9A  | C11A | C16A | C15A | -179(4) |
| C11 | C12 | C13 | C14 | -1.8(9)    | C11A | C12A | C13A | C14A | -6(7)   |
| C12 | C11 | C16 | C15 | -0.2(8)    | C12A | C11A | C16A | C15A | -3(7)   |
| C12 | C13 | C14 | C15 | 1.5(9)     | C12A | C13A | C14A | C15A | 10(6)   |
| C13 | C14 | C15 | O18 | -179.6(5)  | C13A | C14A | C15A | O18A | -180(4) |
| C13 | C14 | C15 | C16 | -0.6(9)    | C13A | C14A | C15A | C16A | -10(7)  |
| C14 | C15 | C16 | C11 | -0.1(9)    | C14A | C15A | C16A | C11A | 7(7)    |
| C16 | C11 | C12 | O17 | -179.0(5)  | C16A | C11A | C12A | O17A | 173(4)  |
| C16 | C11 | C12 | C13 | 1.1(9)     | C16A | C11A | C12A | C13A | 3(7)    |

**Table 2.1.8** Hydrogen Atom Coordinates ( $\text{\AA}\times 10^4$ ) and Isotropic Displacement Parameters ( $\text{\AA}^2\times 10^3$ ) for *N*-(4-fluorophenyl)-2,5-dimethoxybenzamide.

| Atom | <i>x</i> | <i>y</i> | <i>z</i> | U(eq) |
|------|----------|----------|----------|-------|
| H17  | 10310.35 | 3562.51  | 3827.15  | 63    |
| H18  | 12337.32 | 3822.12  | 6229.22  | 62    |
| H8   | 8653.77  | 3708.39  | 5383.4   | 43    |
| H3   | 5739.44  | 3708.22  | 3921.56  | 50    |
| H4   | 7467.85  | 3639.39  | 4033.93  | 48    |
| H6   | 7065.42  | 3740.09  | 5737.12  | 49    |
| H7   | 5340.57  | 3761.85  | 5610.6   | 49    |
| H13  | 12551.45 | 3833.32  | 4365.41  | 42    |
| H14  | 12951.04 | 3874.82  | 5322.12  | 39    |
| H16  | 10025.28 | 3711.92  | 5718.88  | 38    |
| H17A | 12302.21 | 4059.81  | 3844.03  | 65    |
| H18A | 10176.28 | 3665.68  | 6209.27  | 82    |
| H8A  | 13904.6  | 3722.37  | 5409.51  | 47    |
| H3A  | 16818.99 | 3726.82  | 3972.89  | 62    |
| H4A  | 15085.06 | 3851.05  | 4099.54  | 60    |
| H6A  | 15509.61 | 3816.72  | 5809.47  | 59    |
| H7A  | 17249.05 | 3765.74  | 5664.54  | 60    |
| H13A | 10027.03 | 3883.34  | 4350.66  | 43    |
| H14A | 9603.78  | 3609.75  | 5288.16  | 45    |
| H16A | 12496.33 | 3751.06  | 5722.66  | 45    |

**Table 2.1.9** Atomic Occupancy for *N*-(4-fluorophenyl)-2,5-dimethoxybenzamide.

| Atom | Occupancy | Atom | Occupancy | Atom | Occupancy |
|------|-----------|------|-----------|------|-----------|
| F1   | 0.861(6)  | O10  | 0.861(6)  | O17  | 0.861(6)  |
| H17  | 0.861(6)  | O18  | 0.861(6)  | H18  | 0.861(6)  |
| N8   | 0.861(6)  | H8   | 0.861(6)  | C2   | 0.861(6)  |
| C3   | 0.861(6)  | H3   | 0.861(6)  | C4   | 0.861(6)  |
| H4   | 0.861(6)  | C5   | 0.861(6)  | C6   | 0.861(6)  |
| H6   | 0.861(6)  | C7   | 0.861(6)  | H7   | 0.861(6)  |
| C9   | 0.861(6)  | C11  | 0.861(6)  | C12  | 0.861(6)  |
| C13  | 0.861(6)  | H13  | 0.861(6)  | C14  | 0.861(6)  |
| H14  | 0.861(6)  | C15  | 0.861(6)  | C16  | 0.861(6)  |
| H16  | 0.861(6)  | F1A  | 0.139(6)  | O10A | 0.139(6)  |
| O17A | 0.139(6)  | H17A | 0.139(6)  | O18A | 0.139(6)  |
| H18A | 0.139(6)  | N8A  | 0.139(6)  | H8A  | 0.139(6)  |
| C2A  | 0.139(6)  | C3A  | 0.139(6)  | H3A  | 0.139(6)  |
| C4A  | 0.139(6)  | H4A  | 0.139(6)  | C5A  | 0.139(6)  |
| C6A  | 0.139(6)  | H6A  | 0.139(6)  | C7A  | 0.139(6)  |
| H7A  | 0.139(6)  | C9A  | 0.139(6)  | C11A | 0.139(6)  |
| C12A | 0.139(6)  | C13A | 0.139(6)  | H13A | 0.139(6)  |
| C14A | 0.139(6)  | H14A | 0.139(6)  | C15A | 0.139(6)  |
| C16A | 0.139(6)  | H16A | 0.139(6)  |      |           |

Crystal structure determination of *N*-(4-fluorophenyl)-2,5-dimethoxybenzamide

**Crystal Data** for C<sub>13</sub>H<sub>10</sub>FNO<sub>3</sub> (*M* = 247.22 g/mol): tetragonal, space group I4<sub>1</sub>/a (no. 88), *a* = 13.4738(10) Å, *c* = 23.638(2) Å, *V* = 4291.3(7) Å<sup>3</sup>, *Z* = 16, *T* = 100(2) K,  $\mu(\text{MoK}\alpha) = 0.121 \text{ mm}^{-1}$ , *D*<sub>calc</sub> = 1.531 g/cm<sup>3</sup>, 2498 reflections measured (3.48° ≤ 2 $\Theta$  ≤ 55.326°), 2498 unique (*R*<sub>int</sub> = ?, *R*<sub>sigma</sub> = 0.0725) which were used in all calculations. The final *R*<sub>1</sub> was 0.1039 (*I* > 2 $\sigma$ (*I*)) and *wR*<sub>2</sub> was 0.3040 (all data).

Refinement model description

Number of restraints - 429, number of constraints - unknown.

## Details:

### 1. Twinned data refinement

Scales: 0.943(3)

0.057(3)

### 2. Fixed Uiso

At 1.2 times of:

All C(H) groups, All N(H) groups

At 1.5 times of:

All O(H) groups

### 3. Uiso/Uanis restraints and constraints

F1A  $\approx$  O10A  $\approx$  O17A  $\approx$  O18A  $\approx$  N8A  $\approx$  C2A  $\approx$  C3A  $\approx$  C4A

$\approx$  C5A  $\approx$  C6A  $\approx$  C7A  $\approx$  C9A  $\approx$  C11A  $\approx$  C12A  $\approx$  C13A  $\approx$

C14A  $\approx$  C15A  $\approx$  C16A: within 2Å with sigma of 0.01 and sigma for terminal atoms of 0.02

### 4. Rigid body (RIGU) restrains

All non-hydrogen atoms

with sigma for 1-2 distances of 0.004 and sigma for 1-3 distances of 0.004

### 5. Same fragment restrains

{F1, O10, O17, O18, N8, C2, C3, C4, C5, C6, C7, C9, C11, C12, C13, C14, C15,

C16} sigma for 1-2: 0.02, 1-3: 0.04

as

{F1A, O10A, O17A, O18A, N8A, C2A, C3A, C4A, C5A, C6A, C7A, C9A, C11A, C12A, C13A, C14A, C15A, C16A}

### 6. Others

Sof (F1A)=Sof (O10A)=Sof (O17A)=Sof (H17A)=Sof (O18A)=Sof (H18A)=Sof (N8A)=Sof (H8A)=

Sof (C2A)=Sof (C3A)=Sof (H3A)=Sof (C4A)=Sof (H4A)=Sof (C5A)=Sof (C6A)=Sof (H6A)=

Sof (C7A)=Sof (H7A)=Sof (C9A)=Sof (C11A)=Sof (C12A)=Sof (C13A)=Sof (H13A)=Sof (C14A)=

Sof (H14A)=Sof (C15A)=Sof (C16A)=Sof (H16A)=1-FVAR(1)

Sof (F1)=Sof (O10)=Sof (O17)=Sof (H17)=Sof (O18)=Sof (H18)=Sof (N8)=Sof (H8)=Sof (C2)=

Sof (C3)=Sof (H3)=Sof (C4)=Sof (H4)=Sof (C5)=Sof (C6)=Sof (H6)=Sof (C7)=Sof (H7)=

Sof (C9)=Sof (C11)=Sof (C12)=Sof (C13)=Sof (H13)=Sof (C14)=Sof (H14)=Sof (C15)=

Sof (C16)=Sof (H16)=FVAR(1)

### 7.a Aromatic/amide H refined with riding coordinates:

N8(H8), C3(H3), C4(H4), C6(H6), C7(H7), C13(H13), C14(H14), C16(H16),

N8A(H8A), C3A(H3A), C4A(H4A), C6A(H6A), C7A(H7A), C13A(H13A), C14A(H14A),

C16A(H16A)

### 7.b Idealised tetrahedral OH refined as rotating group:

O17(H17), O18(H18), O17A(H17A), O18A(H18A)

2.2 Crystal data for *N*-(3,5-bis(trifluoromethyl)phenyl)-2,5-dimethoxybenzamide

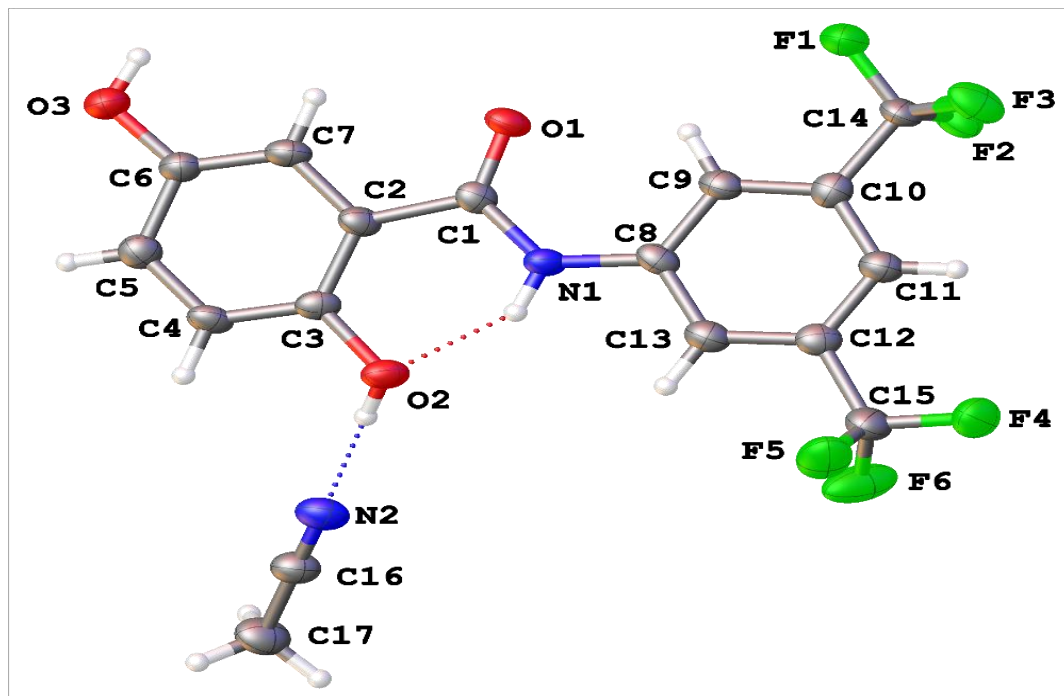

**Table 2.2.1** Crystal data and structure refinement for *N*-(3,5-bis(trifluoromethyl)phenyl)-2,5-dimethoxybenzamide.

|                                             |                                                                              |
|---------------------------------------------|------------------------------------------------------------------------------|
| Identification code                         | pag19_s1730                                                                  |
| Empirical formula                           | C <sub>17</sub> H <sub>12</sub> F <sub>6</sub> N <sub>2</sub> O <sub>3</sub> |
| Formula weight                              | 406.29                                                                       |
| Temperature/K                               | 100(2)                                                                       |
| Crystal system                              | monoclinic                                                                   |
| Space group                                 | P2 <sub>1</sub> /c                                                           |
| a/Å                                         | 11.9740(16)                                                                  |
| b/Å                                         | 4.8398(5)                                                                    |
| c/Å                                         | 29.092(3)                                                                    |
| α/°                                         | 90                                                                           |
| β/°                                         | 91.105(11)                                                                   |
| γ/°                                         | 90                                                                           |
| Volume/Å <sup>3</sup>                       | 1685.6(3)                                                                    |
| Z                                           | 4                                                                            |
| ρ <sub>calc</sub> /cm <sup>3</sup>          | 1.601                                                                        |
| μ/mm <sup>-1</sup>                          | 1.372                                                                        |
| F(000)                                      | 824.0                                                                        |
| Crystal size/mm <sup>3</sup>                | 0.147 × 0.031 × 0.01                                                         |
| Radiation                                   | CuKα (λ = 1.54184)                                                           |
| 2Θ range for data collection/°              | 7.384 to 145.802                                                             |
| Index ranges                                | -14 ≤ h ≤ 14, -5 ≤ k ≤ 5, 0 ≤ l ≤ 35                                         |
| Reflections collected                       | 3231                                                                         |
| Independent reflections                     | 3231 [R <sub>int</sub> = ?, R <sub>sigma</sub> = 0.0938]                     |
| Data/restraints/parameters                  | 3231/3/264                                                                   |
| Goodness-of-fit on F <sup>2</sup>           | 1.173                                                                        |
| Final R indexes [I ≥ 2σ (I)]                | R <sub>1</sub> = 0.1123, wR <sub>2</sub> = 0.3501                            |
| Final R indexes [all data]                  | R <sub>1</sub> = 0.1432, wR <sub>2</sub> = 0.3707                            |
| Largest diff. peak/hole / e Å <sup>-3</sup> | 0.55/-0.52                                                                   |

**Table 2.2.2** Fractional Atomic Coordinates ( $\times 10^4$ ) and Equivalent Isotropic Displacement Parameters ( $\text{\AA}^2 \times 10^3$ ) for *N*-(3,5-bis(trifluoromethyl)phenyl)-2,5-dimethoxybenzamide.  $U_{\text{eq}}$  is defined as 1/3 of the trace of the orthogonalised  $U_{\text{ij}}$  tensor.

| Atom | x        | y         | z          | U(eq)    |
|------|----------|-----------|------------|----------|
| F1   | 11285(4) | 11755(12) | 4013.4(16) | 43.9(13) |
| F2   | 10927(4) | 11406(11) | 4729.3(15) | 41.0(12) |
| F3   | 10704(4) | 15294(10) | 4388.3(18) | 43.2(12) |
| F4   | 6841(4)  | 15505(12) | 4934.8(17) | 46.9(13) |
| F5   | 5736(5)  | 14674(14) | 4370.6(18) | 54.9(15) |
| F6   | 5967(6)  | 11613(12) | 4904(2)    | 66.3(19) |
| O1   | 9375(4)  | 6004(11)  | 3154.6(17) | 30.0(12) |
| O2   | 5954(4)  | 4105(12)  | 3220.6(18) | 30.3(12) |
| O3   | 8592(5)  | -1319(13) | 1965.5(19) | 37.1(13) |
| N1   | 7715(5)  | 7071(13)  | 3474(2)    | 25.1(13) |
| C1   | 8352(6)  | 5623(14)  | 3178(2)    | 23.6(14) |
| C2   | 7767(6)  | 3529(15)  | 2885(2)    | 24.9(14) |
| C3   | 6642(6)  | 2751(15)  | 2918(2)    | 24.0(14) |
| C4   | 6201(6)  | 691(15)   | 2640(2)    | 26.0(15) |
| C5   | 6864(6)  | -677(17)  | 2326(2)    | 29.3(16) |
| C6   | 7990(6)  | 75(16)    | 2288(2)    | 25.5(15) |
| C7   | 8426(6)  | 2143(16)  | 2563(2)    | 27.5(15) |
| C8   | 8049(6)  | 9076(15)  | 3797(2)    | 24.5(14) |
| C9   | 9154(6)  | 9880(16)  | 3881(2)    | 26.5(15) |
| C10  | 9380(6)  | 11823(16) | 4219(2)    | 27.1(15) |
| C11  | 8537(6)  | 13026(16) | 4473(2)    | 27.7(15) |
| C12  | 7444(6)  | 12251(15) | 4383(2)    | 27.1(15) |
| C13  | 7195(6)  | 10275(16) | 4051(2)    | 28.3(15) |
| C14  | 10568(6) | 12580(17) | 4332(2)    | 28.3(15) |
| C15  | 6504(7)  | 13484(18) | 4647(3)    | 34.7(17) |
| N2   | 4428(5)  | 251(15)   | 3574(2)    | 35.5(15) |
| C16  | 3845(7)  | -1375(18) | 3713(3)    | 33.8(17) |
| C17  | 3105(8)  | -3454(19) | 3892(3)    | 42(2)    |

**Table 2.2.3** Anisotropic Displacement Parameters ( $\text{\AA}^2 \times 10^3$ ) for *N*-(3,5-bis(trifluoromethyl)phenyl)-2,5-dimethoxybenzamide. The Anisotropic displacement factor exponent takes the form:  $-2\pi^2[h^2a^{*2}U_{11}+2hka^*b^*U_{12}+\dots]$ .

| Atom | U <sub>11</sub> | U <sub>22</sub> | U <sub>33</sub> | U <sub>23</sub> | U <sub>13</sub> | U <sub>12</sub> |
|------|-----------------|-----------------|-----------------|-----------------|-----------------|-----------------|
| F1   | 26(2)           | 58(3)           | 47(3)           | -14(2)          | 7.2(19)         | -8(2)           |
| F2   | 41(3)           | 44(3)           | 37(2)           | 9(2)            | -7.2(19)        | -15(2)          |
| F3   | 34(3)           | 30(3)           | 66(3)           | 2(2)            | -4(2)           | -9(2)           |
| F4   | 43(3)           | 47(3)           | 51(3)           | -19(2)          | 7(2)            | 1(2)            |
| F5   | 38(3)           | 69(4)           | 57(3)           | -19(3)          | -2(2)           | 20(3)           |
| F6   | 71(4)           | 37(3)           | 93(4)           | -3(3)           | 52(3)           | -2(3)           |
| O1   | 18(2)           | 31(3)           | 40(3)           | -4(2)           | 3.1(19)         | -6(2)           |
| O2   | 23(3)           | 30(3)           | 38(3)           | -3(2)           | 10(2)           | 0(2)            |
| O3   | 29(3)           | 45(4)           | 38(3)           | -12(3)          | 8(2)            | -2(3)           |
| N1   | 18(3)           | 27(3)           | 30(3)           | -3(2)           | 5(2)            | 1(2)            |
| C1   | 23(3)           | 18(3)           | 30(3)           | 2(3)            | 0(3)            | 0(3)            |
| C2   | 21(3)           | 22(3)           | 32(3)           | 0(3)            | 2(3)            | -4(3)           |
| C3   | 20(3)           | 22(3)           | 30(3)           | 3(3)            | 4(2)            | 4(3)            |
| C4   | 16(3)           | 25(4)           | 37(4)           | 1(3)            | 1(3)            | 1(3)            |
| C5   | 29(4)           | 27(4)           | 31(3)           | 0(3)            | 0(3)            | 1(3)            |
| C6   | 19(3)           | 29(4)           | 29(3)           | -2(3)           | 2(2)            | 3(3)            |
| C7   | 21(3)           | 30(4)           | 32(3)           | 2(3)            | 5(3)            | 1(3)            |
| C8   | 19(3)           | 22(4)           | 32(3)           | 5(3)            | -1(3)           | -3(3)           |
| C9   | 22(3)           | 30(4)           | 28(3)           | 3(3)            | 2(3)            | -4(3)           |
| C10  | 31(4)           | 26(4)           | 24(3)           | 2(3)            | 1(3)            | 0(3)            |
| C11  | 24(4)           | 26(4)           | 32(3)           | 1(3)            | 2(3)            | -2(3)           |
| C12  | 27(4)           | 23(4)           | 31(3)           | 4(3)            | 5(3)            | -1(3)           |
| C13  | 24(3)           | 29(4)           | 32(3)           | 2(3)            | 1(3)            | -3(3)           |
| C14  | 21(3)           | 31(4)           | 33(4)           | -2(3)           | 4(3)            | -6(3)           |
| C15  | 29(4)           | 34(4)           | 41(4)           | -4(3)           | 6(3)            | -5(3)           |
| N2   | 24(3)           | 37(4)           | 46(4)           | 4(3)            | 4(3)            | -1(3)           |
| C16  | 27(4)           | 38(5)           | 37(4)           | 3(3)            | 5(3)            | 3(3)            |
| C17  | 37(4)           | 34(5)           | 56(5)           | 1(4)            | 7(4)            | -10(4)          |

**Table 2.2.4** Bond Lengths for *N*-(3,5-bis(trifluoromethyl)phenyl)-2,5-dimethoxybenzamide.

| Atom | Atom | Length/Å  | Atom | Atom | Length/Å  |
|------|------|-----------|------|------|-----------|
| F1   | C14  | 1.337(9)  | C3   | C4   | 1.383(11) |
| F2   | C14  | 1.350(9)  | C4   | C5   | 1.388(10) |
| F3   | C14  | 1.333(10) | C5   | C6   | 1.403(10) |
| F4   | C15  | 1.344(10) | C6   | C7   | 1.379(11) |
| F5   | C15  | 1.341(10) | C8   | C9   | 1.397(10) |
| F6   | C15  | 1.346(10) | C8   | C13  | 1.400(10) |
| O1   | C1   | 1.243(9)  | C9   | C10  | 1.385(11) |
| O2   | C3   | 1.382(8)  | C10  | C11  | 1.389(10) |
| O3   | C6   | 1.371(9)  | C10  | C14  | 1.500(10) |
| N1   | C1   | 1.356(9)  | C11  | C12  | 1.382(10) |
| N1   | C8   | 1.403(9)  | C12  | C13  | 1.387(11) |
| C1   | C2   | 1.491(10) | C12  | C15  | 1.499(10) |
| C2   | C3   | 1.403(10) | N2   | C16  | 1.132(11) |
| C2   | C7   | 1.407(10) | C16  | C17  | 1.444(12) |

**Table 2.2.5** Bond Angles for *N*-(3,5-bis(trifluoromethyl)phenyl)-2,5-dimethoxybenzamide.

| Atom | Atom | Atom | Angle/°  | Atom | Atom | Atom | Angle/°   |
|------|------|------|----------|------|------|------|-----------|
| C1   | N1   | C8   | 128.8(6) | C9   | C10  | C14  | 119.6(7)  |
| O1   | C1   | N1   | 121.7(6) | C11  | C10  | C14  | 118.5(7)  |
| O1   | C1   | C2   | 121.5(6) | C12  | C11  | C10  | 118.8(7)  |
| N1   | C1   | C2   | 116.8(6) | C11  | C12  | C13  | 120.6(7)  |
| C3   | C2   | C1   | 125.7(6) | C11  | C12  | C15  | 120.9(7)  |
| C3   | C2   | C7   | 118.0(7) | C13  | C12  | C15  | 118.6(7)  |
| C7   | C2   | C1   | 116.2(6) | C12  | C13  | C8   | 120.3(7)  |
| O2   | C3   | C2   | 120.1(7) | F1   | C14  | F2   | 105.7(6)  |
| O2   | C3   | C4   | 119.3(6) | F1   | C14  | C10  | 113.2(6)  |
| C4   | C3   | C2   | 120.6(6) | F2   | C14  | C10  | 111.7(6)  |
| C3   | C4   | C5   | 120.8(7) | F3   | C14  | F1   | 107.5(6)  |
| C4   | C5   | C6   | 119.4(7) | F3   | C14  | F2   | 105.9(6)  |
| O3   | C6   | C5   | 116.5(7) | F3   | C14  | C10  | 112.4(7)  |
| O3   | C6   | C7   | 123.8(6) | F4   | C15  | F6   | 106.5(6)  |
| C7   | C6   | C5   | 119.7(7) | F4   | C15  | C12  | 113.0(7)  |
| C6   | C7   | C2   | 121.4(7) | F5   | C15  | F4   | 104.8(7)  |
| C9   | C8   | N1   | 124.5(6) | F5   | C15  | F6   | 107.0(7)  |
| C9   | C8   | C13  | 119.5(7) | F5   | C15  | C12  | 112.1(6)  |
| C13  | C8   | N1   | 116.1(6) | F6   | C15  | C12  | 112.9(7)  |
| C10  | C9   | C8   | 119.0(7) | N2   | C16  | C17  | 179.7(10) |
| C9   | C10  | C11  | 121.9(7) |      |      |      |           |

**Table 2.2.6** Hydrogen Bonds for *N*-(3,5-bis(trifluoromethyl)phenyl)-2,5-dimethoxybenzamide.

| D  | H  | A               | d(D-H)/Å | d(H-A)/Å | d(D-A)/Å | D-H-A/° |
|----|----|-----------------|----------|----------|----------|---------|
| O2 | H2 | N2              | 0.84(2)  | 1.99(3)  | 2.818(9) | 168(11) |
| O3 | H3 | O1 <sup>1</sup> | 0.84(2)  | 1.91(4)  | 2.711(8) | 161(11) |
| N1 | H1 | O2              | 0.88(2)  | 1.89(6)  | 2.645(8) | 143(8)  |

<sup>1</sup>2-X,-1/2+Y,1/2-Z

**Table 2.2.7** Torsion Angles for *N*-(3,5-bis(trifluoromethyl)phenyl)-2,5-dimethoxybenzamide.

| A  | B  | C   | D   | Angle/°   | A   | B   | C   | D   | Angle/°   |
|----|----|-----|-----|-----------|-----|-----|-----|-----|-----------|
| O1 | C1 | C2  | C3  | 173.2(7)  | C8  | C9  | C10 | C11 | -1.0(11)  |
| O1 | C1 | C2  | C7  | -3.8(10)  | C8  | C9  | C10 | C14 | 176.4(7)  |
| O2 | C3 | C4  | C5  | 178.8(6)  | C9  | C8  | C13 | C12 | 0.3(11)   |
| O3 | C6 | C7  | C2  | 179.3(7)  | C9  | C10 | C11 | C12 | 0.0(11)   |
| N1 | C1 | C2  | C3  | -6.2(10)  | C9  | C10 | C14 | F1  | 15.2(10)  |
| N1 | C1 | C2  | C7  | 176.8(6)  | C9  | C10 | C14 | F2  | -103.9(8) |
| N1 | C8 | C9  | C10 | -177.9(7) | C9  | C10 | C14 | F3  | 137.2(7)  |
| N1 | C8 | C13 | C12 | 179.1(7)  | C10 | C11 | C12 | C13 | 1.1(11)   |
| C1 | N1 | C8  | C9  | -2.5(11)  | C10 | C11 | C12 | C15 | 179.9(7)  |
| C1 | N1 | C8  | C13 | 178.7(7)  | C11 | C10 | C14 | F1  | -167.4(7) |
| C1 | C2 | C3  | O2  | 4.9(11)   | C11 | C10 | C14 | F2  | 73.5(9)   |
| C1 | C2 | C3  | C4  | -177.2(7) | C11 | C10 | C14 | F3  | -45.4(9)  |
| C1 | C2 | C7  | C6  | 177.0(7)  | C11 | C12 | C13 | C8  | -1.2(11)  |
| C2 | C3 | C4  | C5  | 0.9(11)   | C11 | C12 | C15 | F4  | 5.5(11)   |
| C3 | C2 | C7  | C6  | -0.2(11)  | C11 | C12 | C15 | F5  | 123.6(8)  |
| C3 | C4 | C5  | C6  | -1.0(11)  | C11 | C12 | C15 | F6  | -115.5(8) |
| C4 | C5 | C6  | O3  | -178.8(7) | C13 | C8  | C9  | C10 | 0.8(10)   |
| C4 | C5 | C6  | C7  | 0.5(11)   | C13 | C12 | C15 | F4  | -175.6(7) |
| C5 | C6 | C7  | C2  | 0.1(11)   | C13 | C12 | C15 | F5  | -57.5(10) |
| C7 | C2 | C3  | O2  | -178.2(6) | C13 | C12 | C15 | F6  | 63.4(10)  |
| C7 | C2 | C3  | C4  | -0.3(10)  | C14 | C10 | C11 | C12 | -177.3(7) |
| C8 | N1 | C1  | O1  | -1.7(11)  | C15 | C12 | C13 | C8  | 179.9(7)  |
| C8 | N1 | C1  | C2  | 177.7(6)  |     |     |     |     |           |

**Table 2.2.8** Hydrogen Atom Coordinates ( $\text{\AA} \times 10^4$ ) and Isotropic Displacement Parameters ( $\text{\AA}^2 \times 10^3$ ) for *N*-(3,5-bis(trifluoromethyl)phenyl)-2,5-dimethoxybenzamide.

| Atom | <i>x</i> | <i>y</i>  | <i>z</i> | U(eq) |
|------|----------|-----------|----------|-------|
| H2   | 5450(60) | 3160(190) | 3340(30) | 46    |
| H3   | 9200(50) | -500(200) | 1990(40) | 56    |
| H1   | 7000(20) | 6680(190) | 3460(30) | 30    |
| H4   | 5435.86  | 206.99    | 2663.17  | 31    |
| H5   | 6557.61  | -2109.56  | 2139.48  | 35    |
| H7   | 9189.04  | 2643.5    | 2534.57  | 33    |
| H9   | 9742.43  | 9103.88   | 3708.21  | 32    |
| H11  | 8709.57  | 14357.5   | 4703.2   | 33    |
| H13  | 6441.48  | 9731.76   | 3996.84  | 34    |
| H17A | 2527.28  | -3895.54  | 3660.36  | 63    |
| H17B | 2752.91  | -2753.75  | 4169.98  | 63    |
| H17C | 3533.8   | -5124.83  | 3967.04  | 63    |

Crystal structure determination of [pag19\_s1730]

**Crystal Data** for  $\text{C}_{17}\text{H}_{12}\text{F}_6\text{N}_2\text{O}_3$  ( $M = 406.29$  g/mol): monoclinic, space group  $P2_1/c$  (no. 14),  $a = 11.9740(16)$   $\text{\AA}$ ,  $b = 4.8398(5)$   $\text{\AA}$ ,  $c = 29.092(3)$   $\text{\AA}$ ,  $\beta = 91.105(11)^\circ$ ,  $V = 1685.6(3)$   $\text{\AA}^3$ ,  $Z = 4$ ,  $T = 100(2)$  K,  $\mu(\text{CuK}\alpha) = 1.372$   $\text{mm}^{-1}$ ,  $D_{\text{calc}} = 1.601$   $\text{g/cm}^3$ , 3231 reflections measured ( $7.384^\circ \leq 2\theta \leq 145.802^\circ$ ), 3231 unique ( $R_{\text{int}} = ?$ ,  $R_{\text{sigma}} = 0.0938$ ) which were used in all calculations. The final  $R_1$  was 0.1123 ( $I > 2\sigma(I)$ ) and  $wR_2$  was 0.3707 (all data).

Refinement model description

Number of restraints - 3, number of constraints - unknown.

Details:

1. Twinned data refinement  
Scales: 0.694  
0.306
2. Fixed Uiso  
At 1.2 times of:  
All C(H) groups, All N(H) groups  
At 1.5 times of:  
All C(H,H,H) groups, All O(H) groups
3. Restrained distances  
N1-H1  
0.88 with sigma of 0.02  
O2-H2 = O3-H3  
0.84 with sigma of 0.02
- 4.a Aromatic/amide H refined with riding coordinates:  
C4(H4), C5(H5), C7(H7), C9(H9), C11(H11), C13(H13)
- 4.b Idealised Me refined as rotating group:  
C17(H17A,H17B,H17C)

### 3. $^1\text{H}$ NMR Titration Anion Binding Studies

#### Equipment and Sample Preparation

$^1\text{H}$  NMR titrations were performed on a Bruker Avance DPX 400 spectrometer. For NMR titrations with chloride, a constant host concentration was maintained ( $\sim 5.0$  mM) by using the host solution to dissolve the guest to make the guest stock solution. Over the course of the titration Hamiltonian Microlitre syringes were used to add aliquots of the guest stock solution to the NMR sample of the host solution.

The anions were added as the tetrabutylammonium (TBA) salts after being dried under high vacuum ( $< 1.0$  mmHg) for 24 h. Stock solutions of the host were prepared in a  $\text{CD}_3\text{CN}$  / 1%  $\text{DMSO-}d_6$  solution, or a pure  $\text{CD}_3\text{CN}$  solution. The solvent used is noted in the information for each titration. The host stock solutions (500  $\mu\text{L}$ ) were transferred to an air-tight screw-cap NMR sample tube (5 mm ID) and the same host stock solution was used to prepare the standard guest titrant solution containing 20-100 mM of the TBA-anion salts. This ensured a constant concentration of the host for the duration of the titration experiment.

#### Titration Procedure

Over the course of the titration small aliquots (2-100  $\mu\text{L}$ ) of the standard guest solution were added to the host solution ( $\sim 500$   $\mu\text{L}$ ) in the NMR tube. For each titration 15-20 data points were collected and at the end of the titration approximately 50 equivalents of the guest anion salt were present. Upon each addition of the standard guest solution the samples were thoroughly shaken in the NMR tube and then allowed to equilibrate for up to 2 minutes inside the NMR probe before the spectra were taken. Throughout each titration experiment all parameters of the NMR spectrometer remained constant.

#### Titration Data Fitting

In all cases the proton resonances were monitored for changes in chemical shift. Where possible two or more resonances were followed, allowing several data sets to use in determination of the association constant ( $K_a$ ). Global fitting takes into account all data sets at the same time and improves the quality of the nonlinear curve fitting. The [supramolecular.org](http://supramolecular.org) web applet was used to fit the titration data to either a 1:1 binding model or 2:1 binding model. A 2:1 model was preferred when the covariance of fit ( $\text{cov}_{\text{fit}}$ ) was greater than 5 times better than for the 1:1 model.

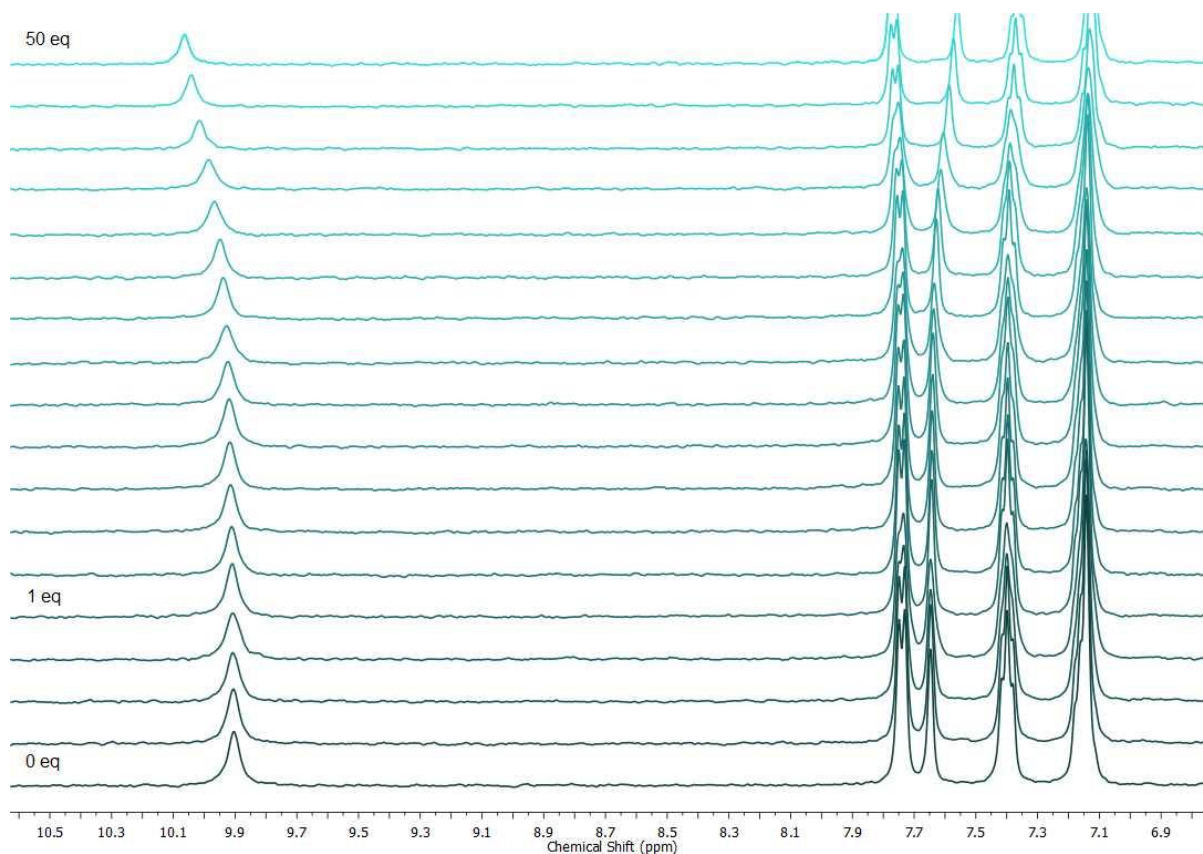

Figure 45.  $^1\text{H}$  NMR titration spectra as a stack plot for 2,5-dimethoxy-N-phenylbenzamide (5 mM) + TBACl in  $\text{CD}_3\text{CN}-d_3$  / 1%  $\text{DMSO}-d_6$  at 298 K.

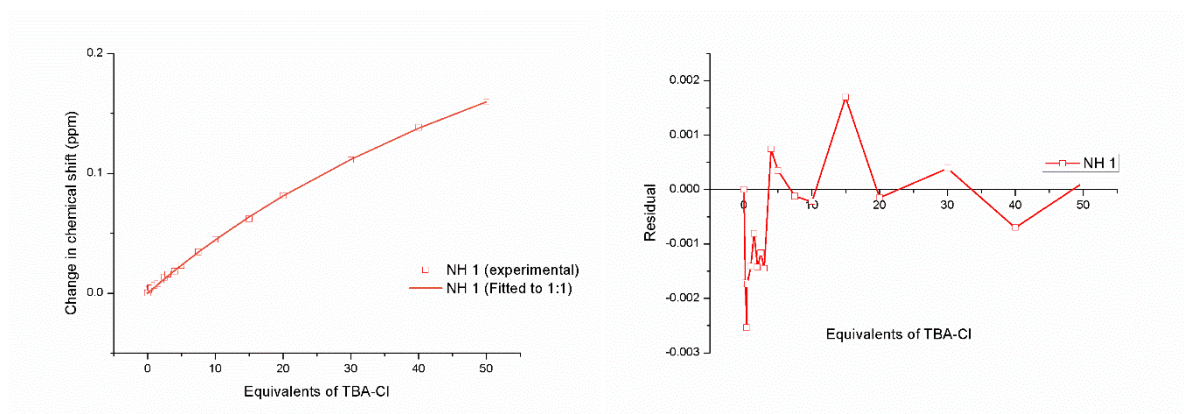

Figure 46. Fitted binding isotherm of 2,5-dimethoxy-N-phenylbenzamide + TBACl showing the change in chemical shift of the NH proton fitted to the 1:1 binding model (left).  $K_a = 2.18 \text{ M}^{-1}$  Residual plot showing the random error obtained from the binding isotherm fitting (right). Covariance of fit ( $\text{cov}_{\text{fit}}$ ) =  $4.57 \times 10^{-4}$ . Link to Bindfit fitting: <http://app.supramolecular.org/bindfit/view/a3a8083e-2d82-4ce7-8eb8-8c326a21b893>.

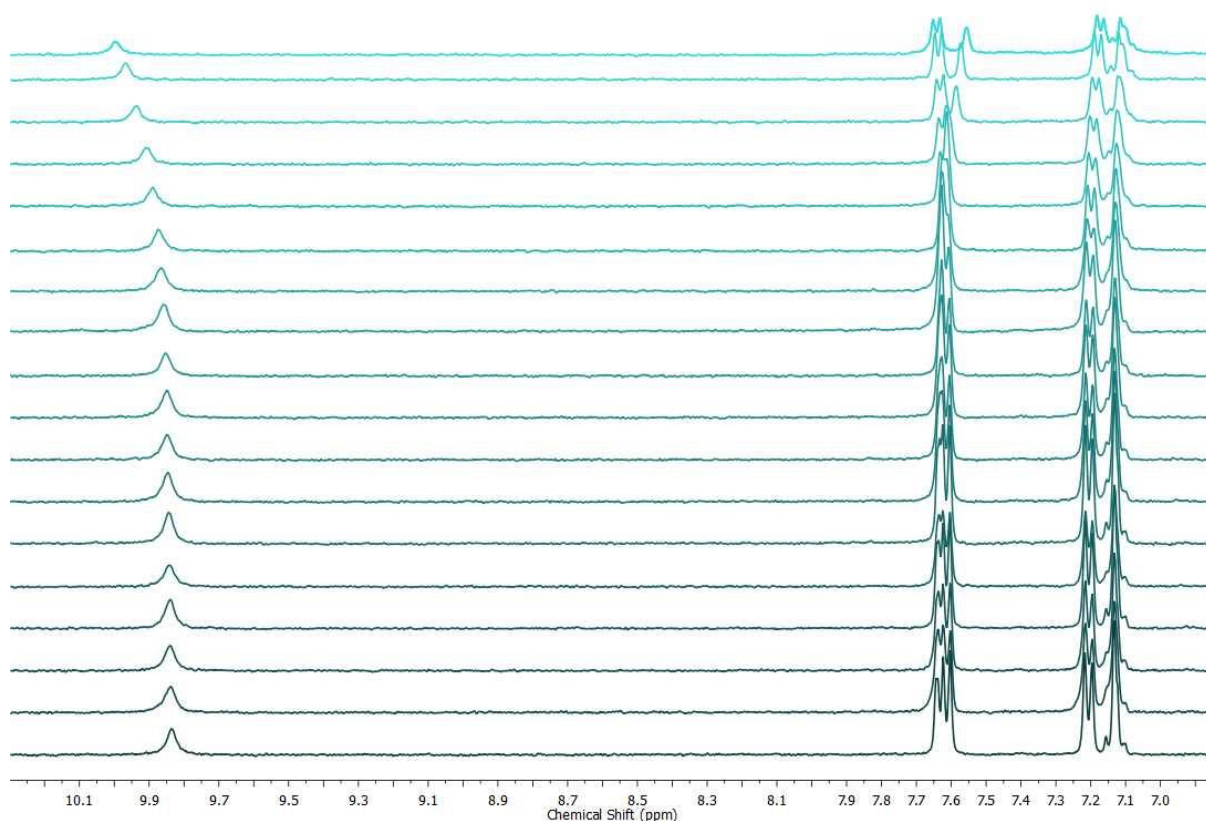

Figure 47.  $^1\text{H}$  NMR titration spectra as a stack plot for 2,5-dimethoxy-N-(p-tolyl)benzamide (5 mM) + TBACl in  $\text{CD}_3\text{CN}-d_3$  / 1%  $\text{DMSO}-d_6$  at 298 K.

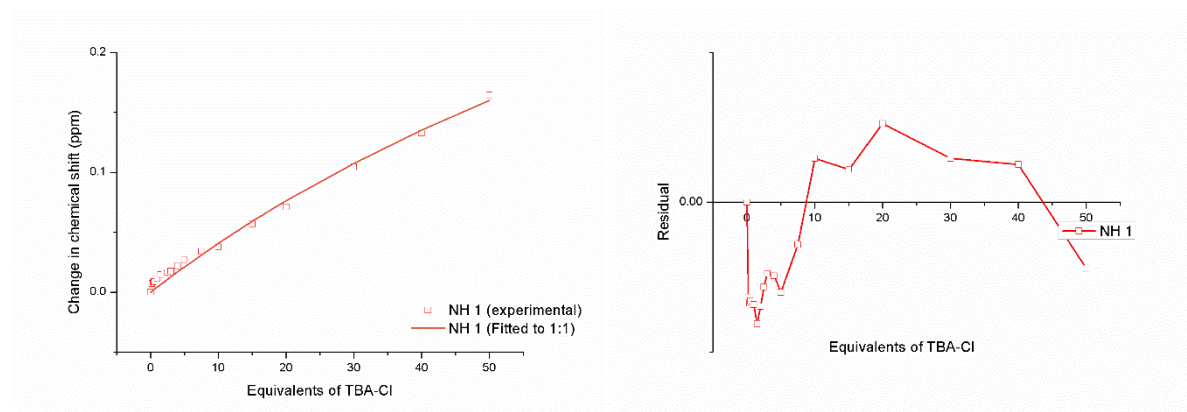

Figure 48. Fitted binding isotherm of 2,5-dimethoxy-N-(p-tolyl)benzamide + TBACl showing the change in chemical shift of the NH proton fitted to the 1:1 binding model (left).  $K_a = 1.48 \text{ M}^{-1}$  Residual plot showing the random error obtained from the binding isotherm fitting (right). Covariance of fit ( $\text{cov}_{\text{fit}}$ ) =  $5.34 \times 10^{-3}$ . Link to Bindfit fitting: <http://app.supramolecular.org/bindfit/view/6f20ff00-a6c8-4bd6-9451-acc783b3fb0>.

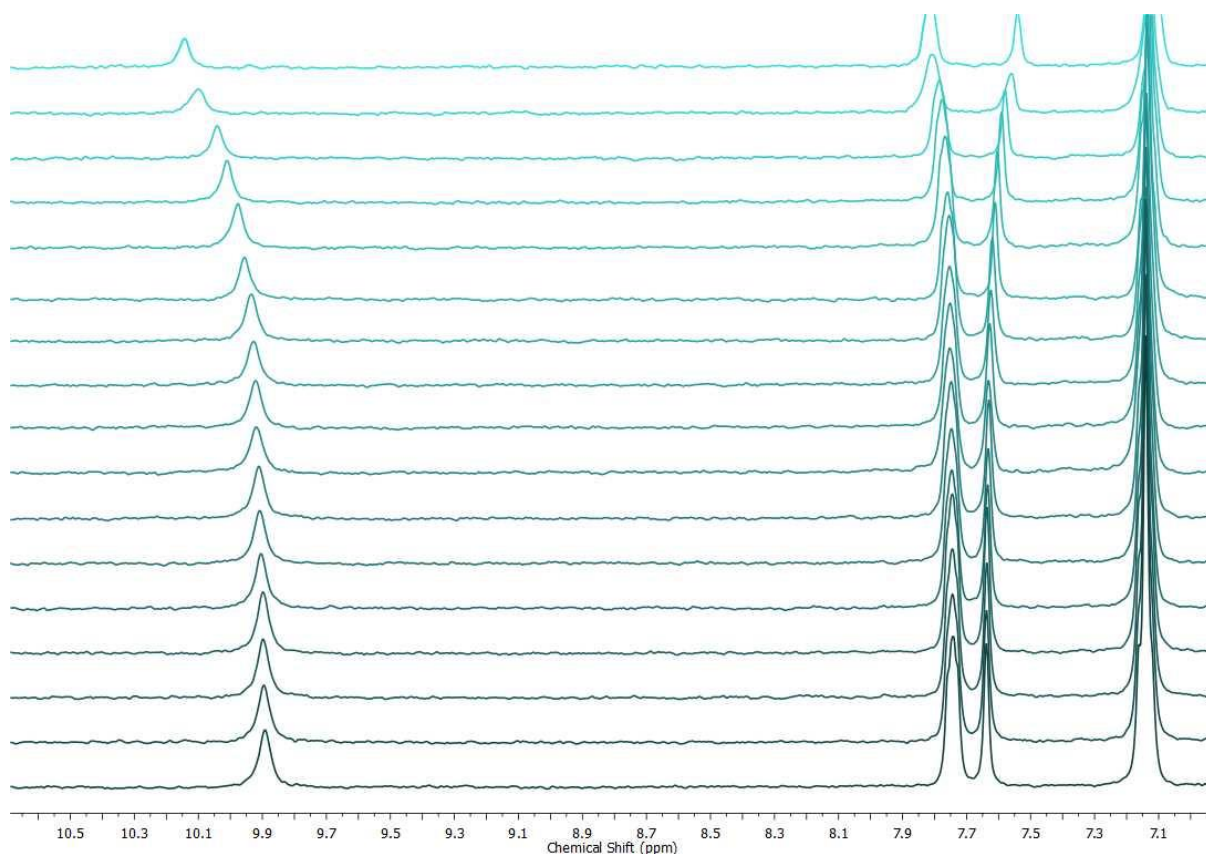

Figure 49.  $^1\text{H}$  NMR titration spectra as a stack plot for *N*-(4-fluorophenyl)-2,5-dimethoxybenzamide (5 mM) + TBACl in  $\text{CD}_3\text{CN}-d_3$  /1%  $\text{DMSO}-d_6$  at 298 K.

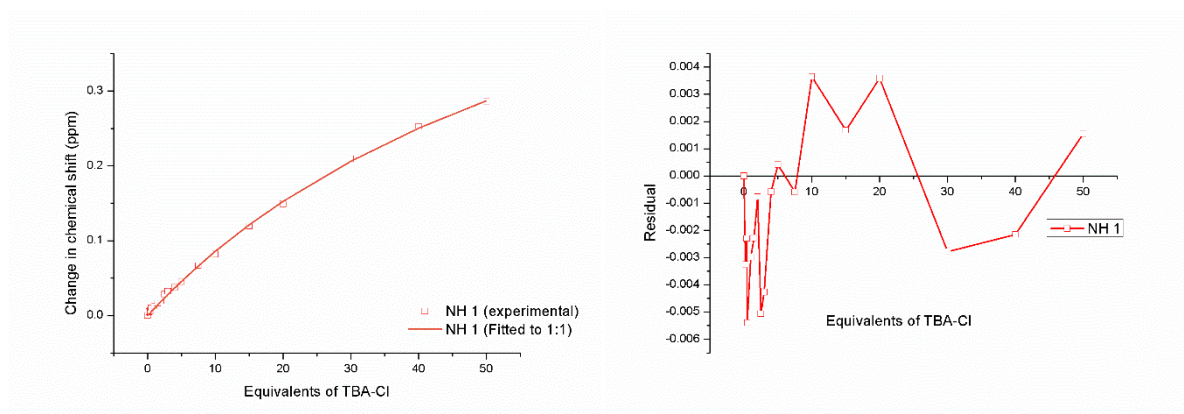

Figure 50. Fitted binding isotherm of *N*-(4-fluorophenyl)-2,5-dimethoxybenzamide + TBACl showing the change in chemical shift of the NH proton fitted to the 1:1 binding model (left).  $K_a = 2.92 \text{ M}^{-1}$  Residual plot showing the random error obtained from the binding isotherm fitting (right). Covariance of fit ( $\text{cov}_{\text{fit}}$ ) =  $8.91 \times 10^{-4}$ . Link to Bindfit fitting: <http://app.supramolecular.org/bindfit/view/5bfbd64f-7e92-4de1-8492-aa930d7321dc>.

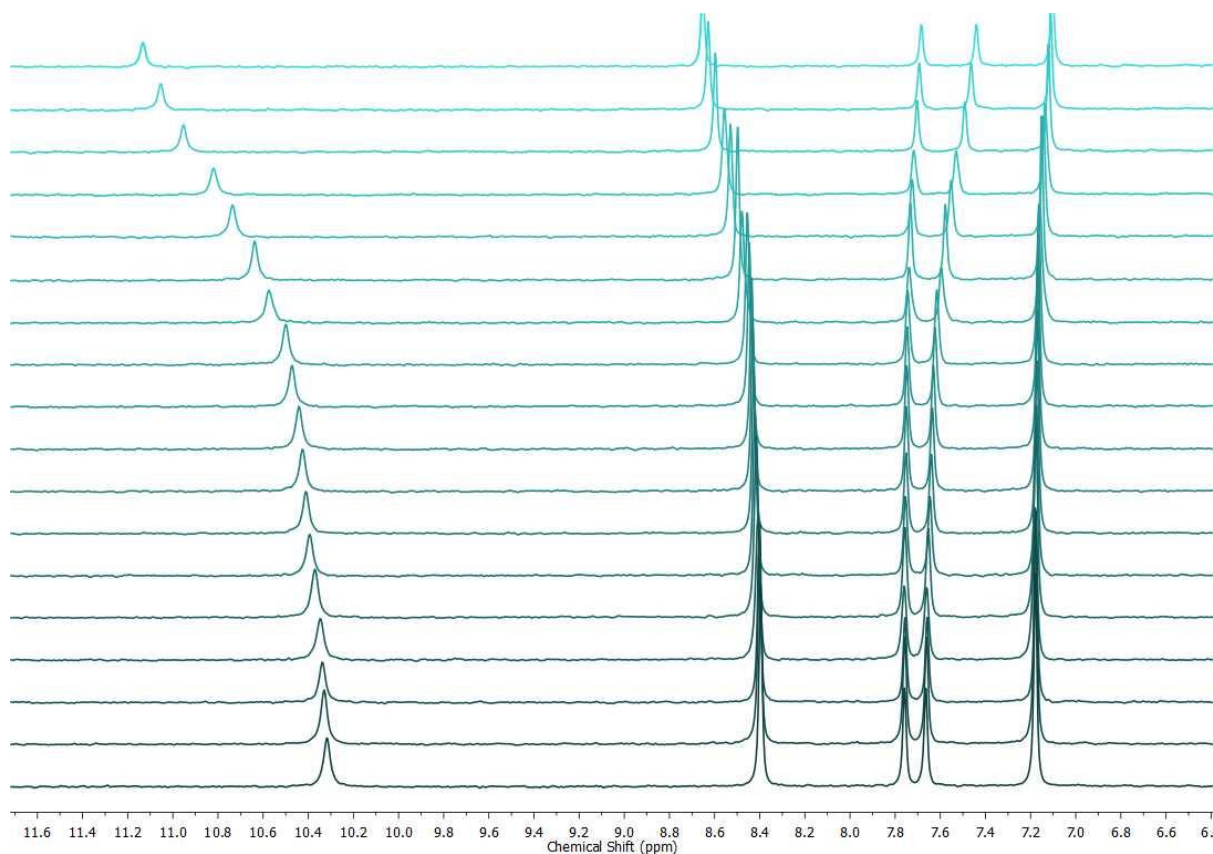

Figure 51.  $^1\text{H}$  NMR titration spectra as a stack plot for *N*-(3,5-bis(trifluoromethyl)phenyl)-2,5-dimethoxybenzamide (5 mM) + TBACl in  $\text{CD}_3\text{CN}-d_3$  /1%  $\text{DMSO}-d_6$  at 298 K.

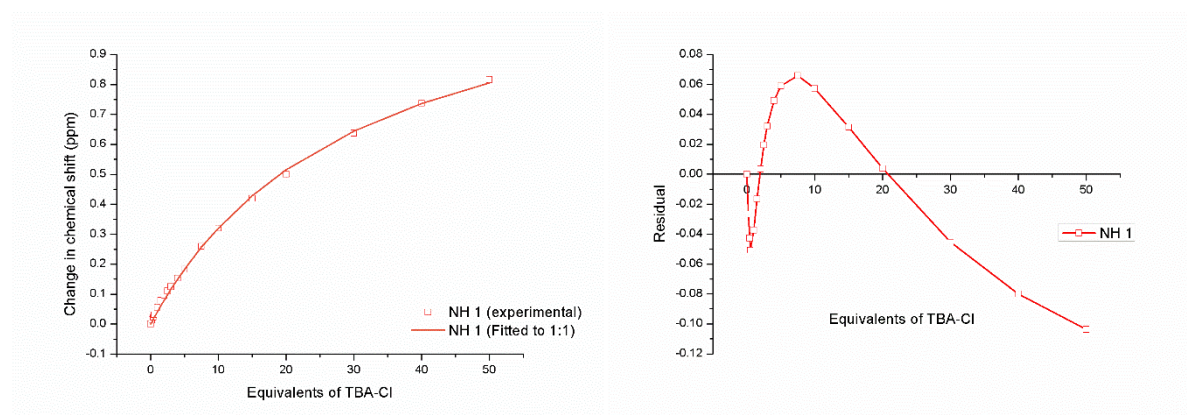

Figure 52. Fitted binding isotherm of *N*-(3,5-bis(trifluoromethyl)phenyl)-2,5-dimethoxybenzamide + TBACl showing the change in chemical shift of the NH proton fitted to the 1:1 binding model (left).  $K_a = 6.69 \text{ M}^{-1}$  Residual plot showing the random error obtained from the binding isotherm fitting (right). Covariance of fit ( $\text{cov}_{\text{fit}}$ ) =  $1.16 \times 10^{-3}$ . Link to Bindfit fitting: <http://app.supramolecular.org/bindfit/view/e6081634-e1d0-49a8-a641-7e7c69fd6d15>.

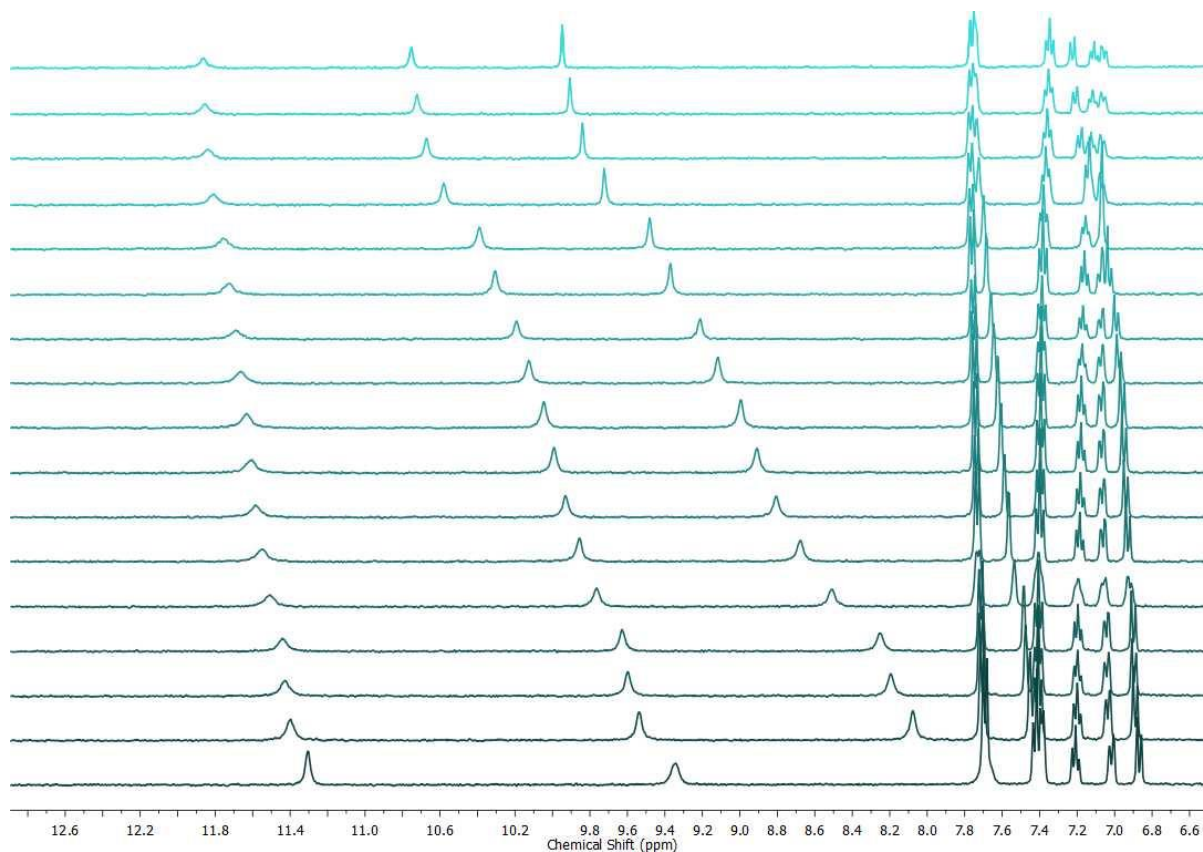

Figure 53.  $^1\text{H}$  NMR titration spectra as a stack plot for 2,5-dihydroxy-*N*-phenylbenzamide (5 mM) + TBACl in  $\text{CD}_3\text{CN}-d_3$  /1%  $\text{DMSO}-d_6$  at 298 K.

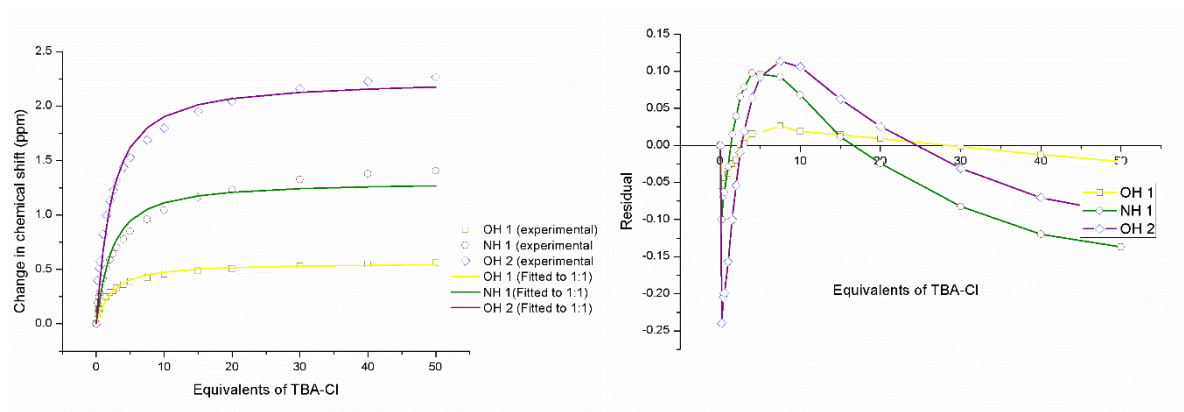

Figure 54. Fitted binding isotherm of 2,5-dihydroxy-*N*-phenylbenzamide + TBACl showing the change in chemical shift of the OH and NH protons fitted to the 1:1 binding model (left).  $K_a = 124.85 \text{ M}^{-1}$  Residual plot showing the random error obtained from the binding isotherm fitting (right). Covariance of fit ( $\text{cov}_{\text{fit}}$ ) =  $1.61 \times 10^{-2}$ . Link to Bindfit fitting: <http://app.supramolecular.org/bindfit/view/8ebd8323-a206-43ad-9482-c8a6625e0288>.

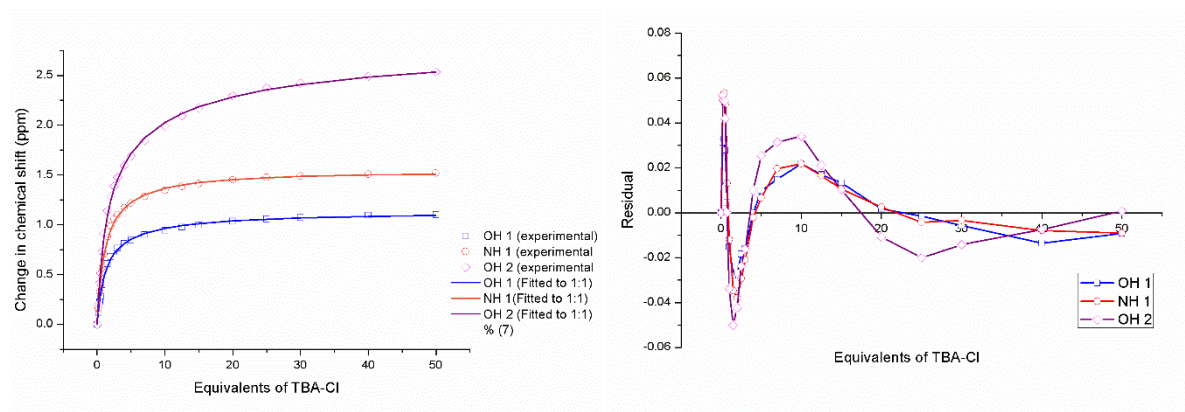

Figure 55. Fitted binding isotherm of 2,5-dihydroxy-*N*-phenylbenzamide + TBACl showing the change in chemical shift of the OH and NH protons fitted to the 2:1 binding model (left)  $K_{11} = 112.96 \text{ M}^{-1}$ ,  $K_{12} = 679.5 \text{ M}^{-1}$ . Residual plot showing the random error obtained from the binding isotherm fitting (right). Covariance of fit ( $\text{cov}_{\text{fit}}$ ) =  $1.23 \times 10^{-3}$ . Link to Bindfit fitting: <http://app.supramolecular.org/bindfit/view/6b35f570-2a30-4e86-bc62-e13bdf396c6d>.

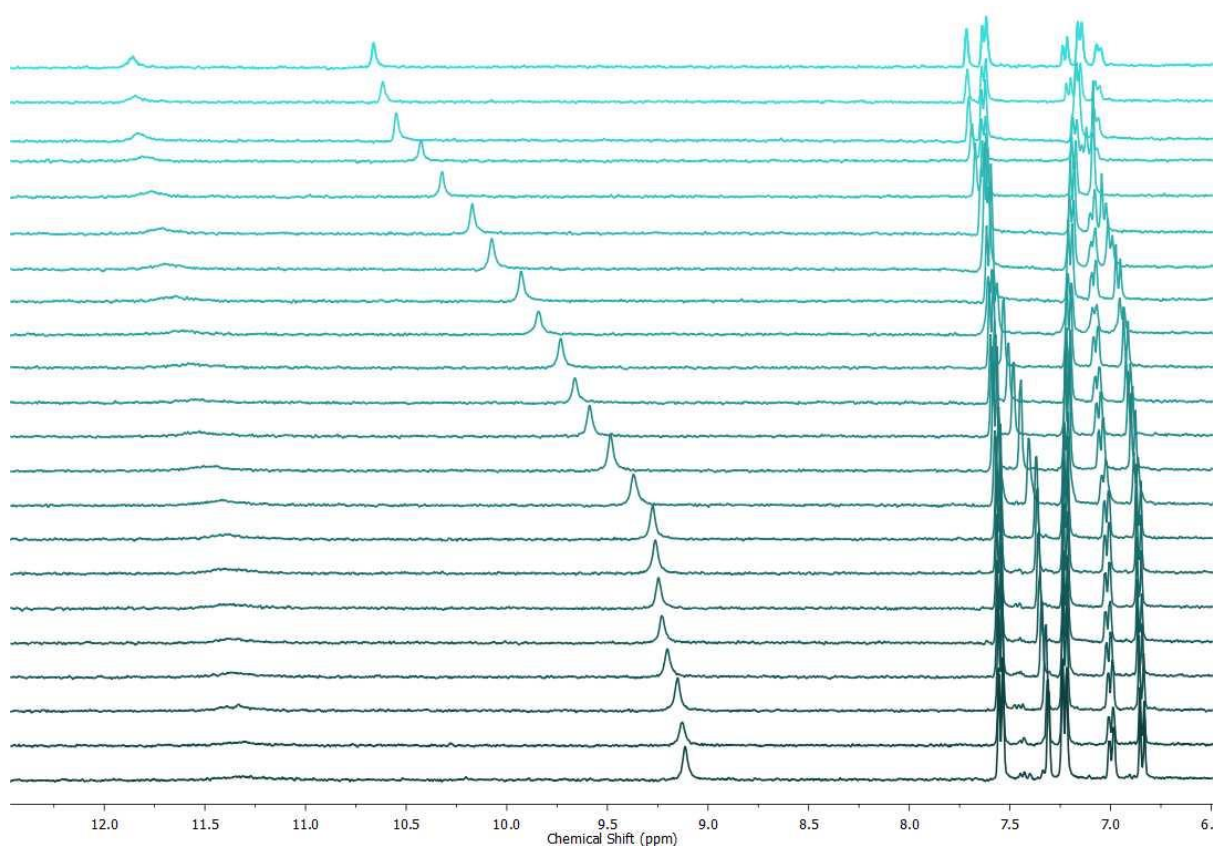

Figure 56.  $^1\text{H}$  NMR titration spectra as a stack plot for 2,5-dihydroxy-*N*-(*p*-tolyl)benzamide (5 mM) + TBACl in  $\text{CD}_3\text{CN}-d_3$  /1%  $\text{DMSO}-d_6$  at 298 K.

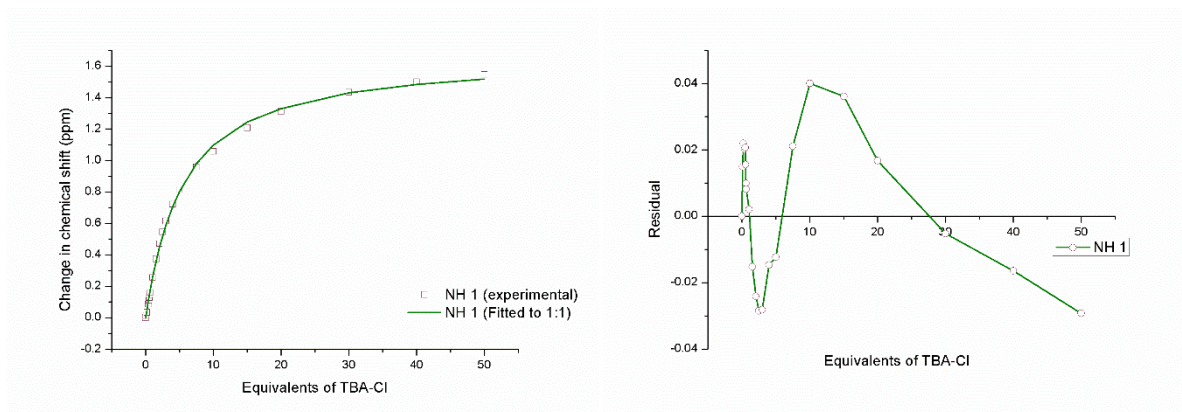

Figure 57. Fitted binding isotherm of *N*-(4-fluorophenyl)-2,5-dihydroxybenzamide + TBACl showing the change in chemical shift of the OH and NH protons fitted to the 1:1 binding model (left)  $K_a = 41.47 \text{ M}^{-1}$ . Residual plot showing the random error obtained from the binding isotherm fitting (right). Covariance of fit ( $\text{cov}_{\text{fit}}$ ) =  $1.56 \times 10^{-3}$ . Link to Bindfit fitting: <http://app.supramolecular.org/bindfit/view/d28e7bd7-dbf9-4532-851d-7a81ca565211>.

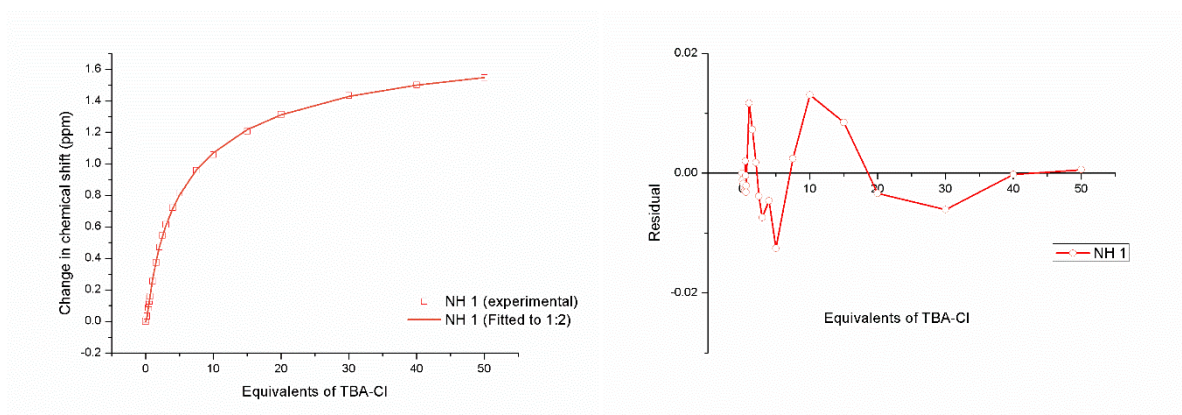

Figure 58. Fitted binding isotherm of 2,5-dihydroxy-*N*-(*p*-tolyl)benzamide + TBACl showing the change in chemical shift of the NH protons fitted to the 2:1 binding model (left)  $K_{11} = 191.36 \text{ M}^{-1}$ ,  $K_{12} = 665.6 \text{ M}^{-1}$ . Residual plot showing the random error obtained from the binding isotherm fitting (right). Covariance of fit ( $\text{cov}_{\text{fit}}$ ) =  $1.28 \times 10^{-4}$ . Link to Bindfit fitting: <http://app.supramolecular.org/bindfit/view/7a990a8d-730c-4de2-b904-2821f4114c32>.

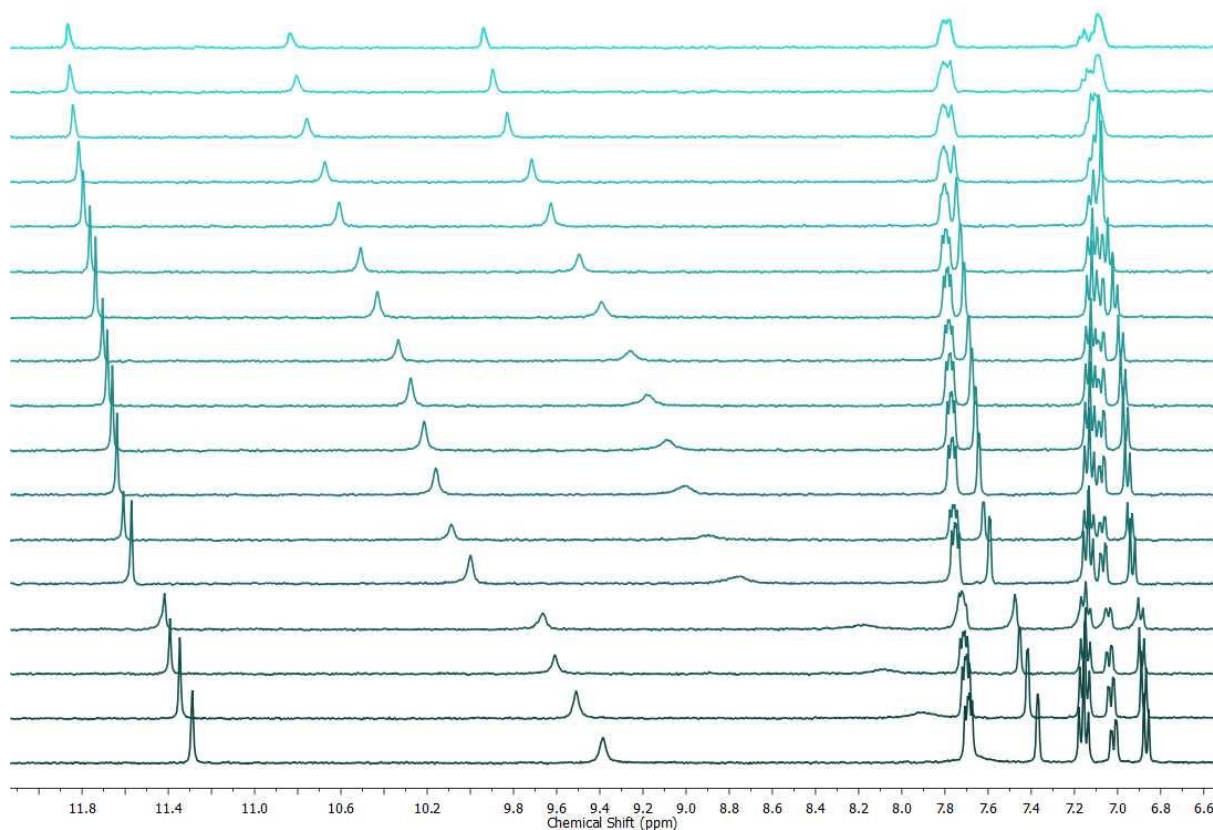

Figure 59.  $^1\text{H}$  NMR titration spectra as a stack plot for *N*-(4-fluorophenyl)-2,5-dihydroxybenzamide (5 mM) + TBACl in  $\text{CD}_3\text{CN}-d_3$  /1%  $\text{DMSO}-d_6$  at 298 K.

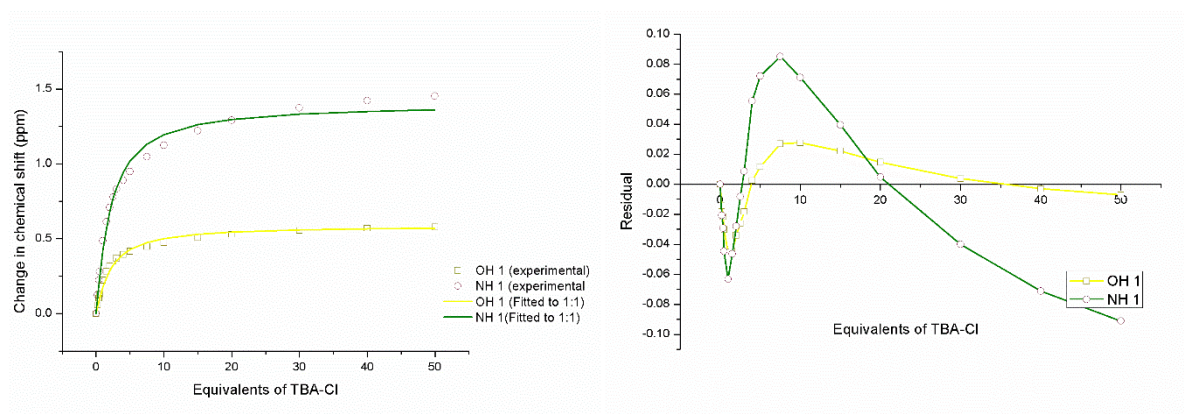

Figure 60. Fitted binding isotherm of *N*-(4-fluorophenyl)-2,5-dihydroxybenzamide + TBACl showing the change in chemical shift of the OH and NH protons fitted to the 1:1 binding model (left)  $K_a = 125.55 \text{ M}^{-1}$ . Residual plot showing the random error obtained from the binding isotherm fitting (right). Covariance of fit ( $\text{cov}_{\text{fit}}$ ) =  $9.07 \times 10^{-3}$ . Link to Bindfit fitting: <http://app.supramolecular.org/bindfit/view/d1dfa649-4fa8-4dc9-9486-54fa7b6dc005>.

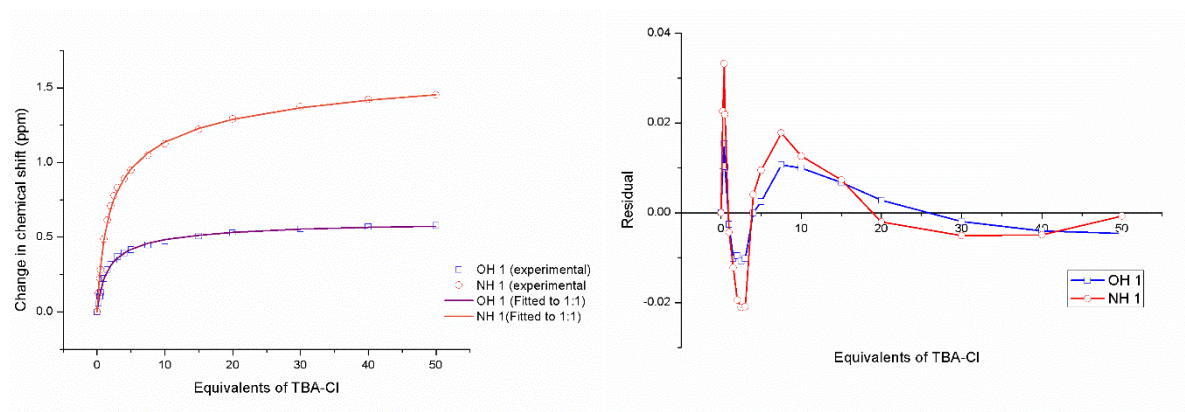

Figure 61. Fitted binding isotherm of *N*-(4-fluorophenyl)-2,5-dihydroxybenzamide + TBACl showing the change in chemical shift of the downfield OH and NH protons fitted to the 2:1 binding model (left)  $K_{11} = 30.76 \text{ M}^{-1}$ ,  $K_{12} = 517.79 \text{ M}^{-1}$ . Residual plot showing the random error obtained from the binding isotherm fitting (right). Covariance of fit ( $\text{cov}_{\text{fit}}$ ) =  $8.61 \times 10^{-4}$ . Link to Bindfit fitting: <http://app.supramolecular.org/bindfit/view/1ebd9451-9a97-44e0-b04a-f0da4ec9da66>.

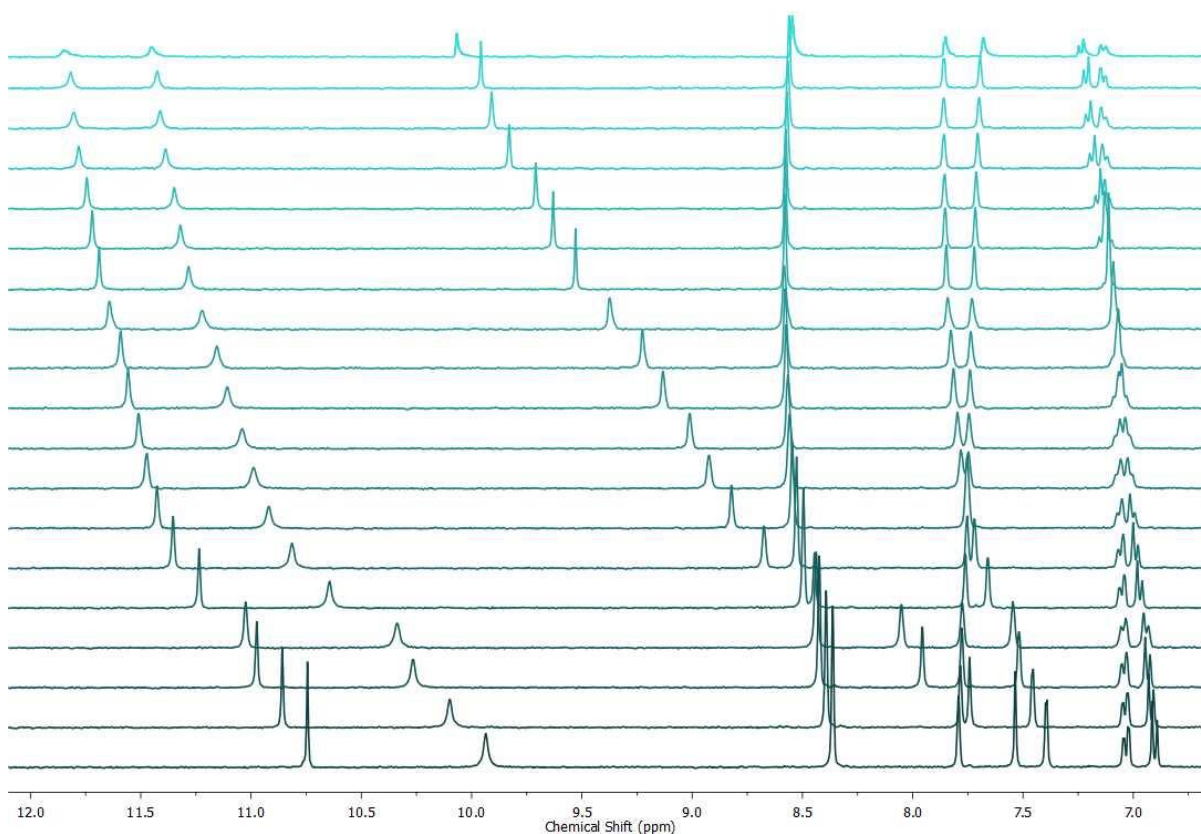

Figure 62.  $^1\text{H}$  NMR titration spectra as a stack plot for *N*-(3,5-bis(trifluoromethyl)phenyl)-2,5-dihydroxybenzamide (5 mM) + TBACl in  $\text{CD}_3\text{CN}-d_3$  /1%  $\text{DMSO}-d_6$  at 298 K.

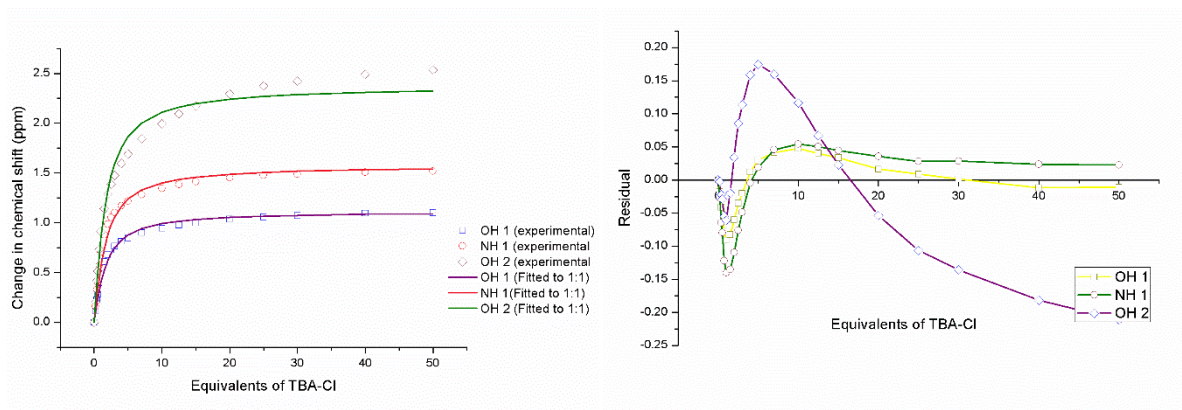

Figure 63. Fitted binding isotherm of *N*-(3,5-bis(trifluoromethyl)phenyl)-2,5-dihydroxybenzamide + TBACl showing the change in chemical shift of the OH and NH protons fitted to the 1:1 binding model (left).  $K_a = 173.50 \text{ M}^{-1}$ . Residual plot showing the random error obtained from the binding isotherm fitting (right). Covariance of fit ( $\text{cov}_{\text{fit}}$ ) =  $1.41 \times 10^{-2}$ . Link to Bindfit fitting: <http://app.supramolecular.org/bindfit/view/3c5571ea-697b-415b-a44c-eef7bc4a492d>.

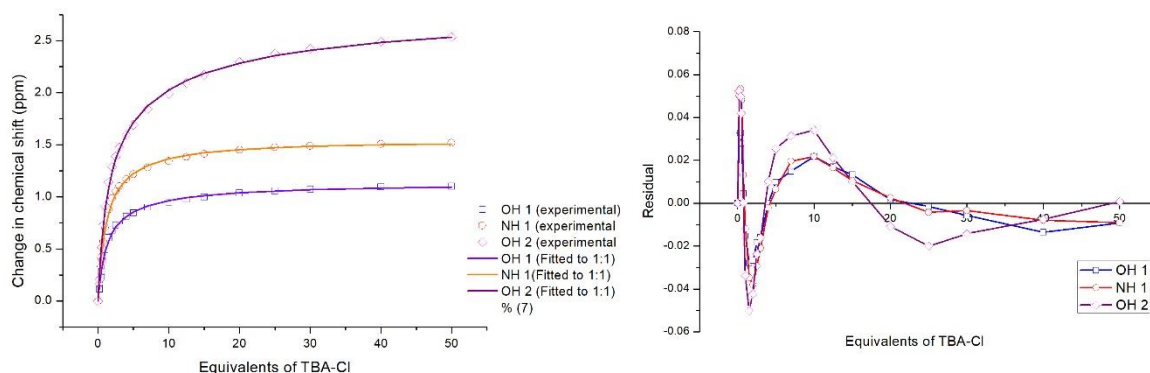

Figure 64. Fitted binding isotherm of *N*-(3,5-bis(trifluoromethyl)phenyl)-2,5-dihydroxybenzamide + TBACl showing the change in chemical shift of the OH and NH protons fitted to the 2:1 binding model (left)  $K_{11} = 54.44 \text{ M}^{-1}$ ,  $K_{12} = 336.49 \text{ M}^{-1}$ . Residual plot showing the random error obtained from the binding isotherm fitting (right). Covariance of fit ( $\text{cov}_{\text{fit}}$ ) =  $1.42 \times 10^{-3}$ . Link to Bindfit fitting: <http://app.supramolecular.org/bindfit/view/b5da4bd0-0c39-48e6-b0d6-7ca3dc5d4c32>.

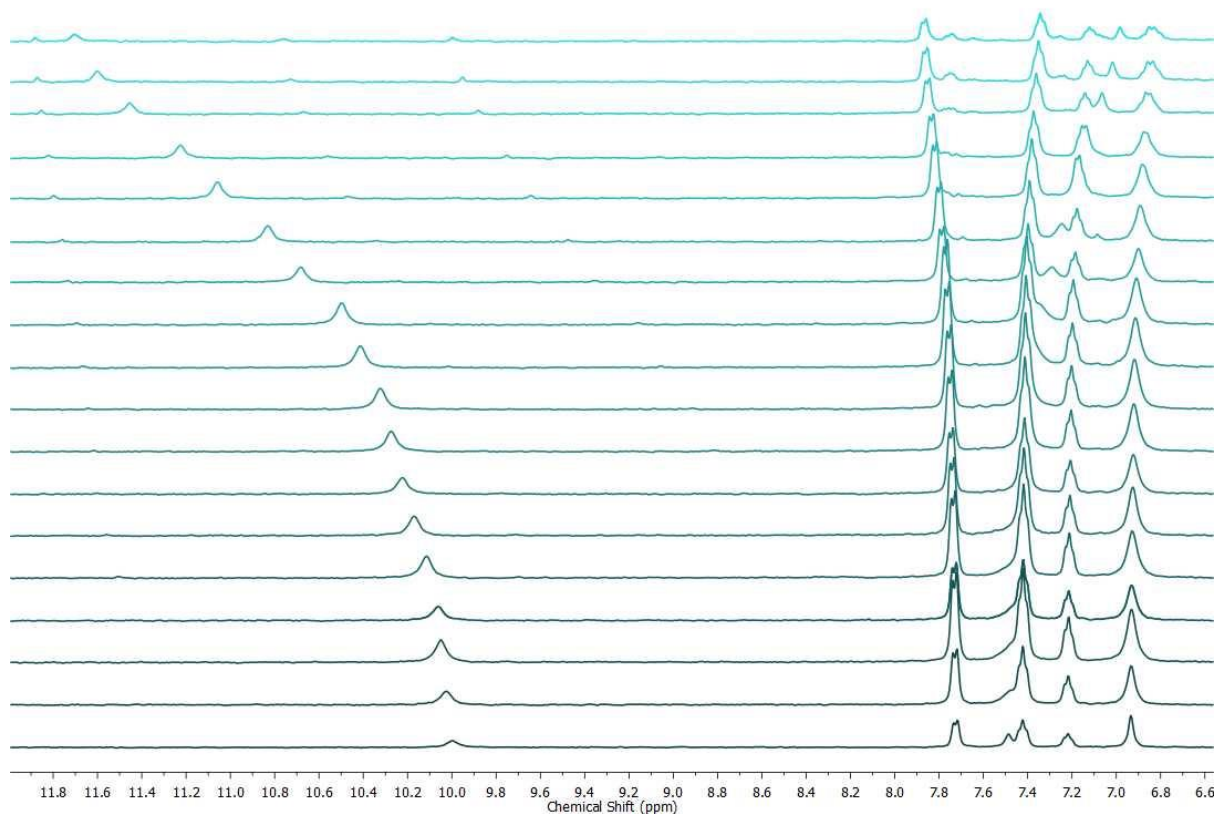

Figure 65.  $^1\text{H}$  NMR titration spectra as a stack plot for 3,6-dioxo-*N*-phenylcyclohexa-1,4-diene-1-carboxamide (5 mM) + TBACl in  $\text{CD}_3\text{CN}-d_3$  /1%  $\text{DMSO}-d_6$  at 298 K.

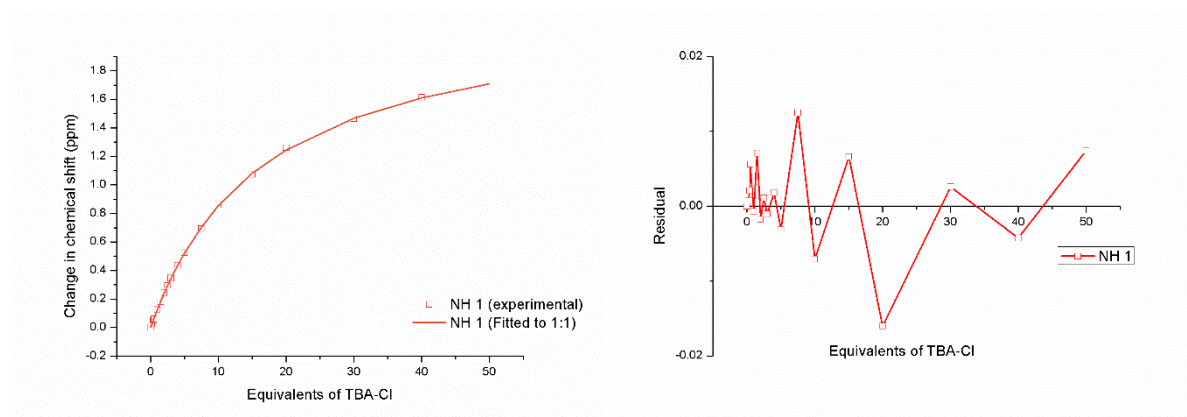

Figure 66. Fitted binding isotherm of 3,6-dioxo-*N*-phenylcyclohexa-1,4-diene-1-carboxamide + TBACl showing the change in chemical shift of the NH proton fitted to the 1:1 binding model (left).  $K_a = 12.57 \text{ M}^{-1}$  Residual plot showing the random error obtained from the binding isotherm fitting (right). Covariance of fit ( $\text{cov}_{\text{fit}}$ ) =  $1.19 \times 10^{-4}$ . Link to Bindfit: <http://app.supramolecular.org/bindfit/view/c47caa71-aa70-4477-8ff5-a03f89cf0970>.

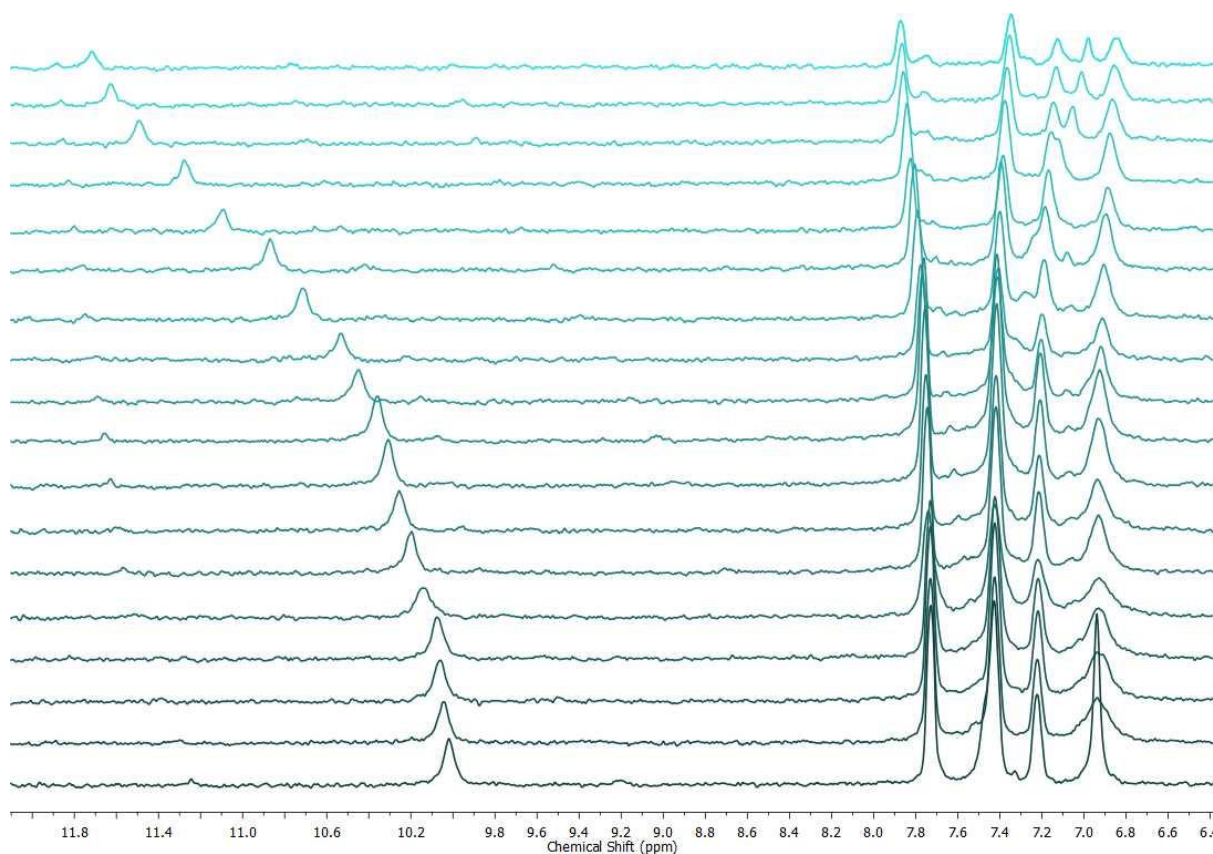

Figure 67.  $^1\text{H}$  NMR titration spectra as a stack plot for 3,6-dioxo-*N*-phenylcyclohexa-1,4-diene-1-carboxamide (5 mM) + TBACl in pure  $\text{CD}_3\text{CN-d}_3$  at 298 K.

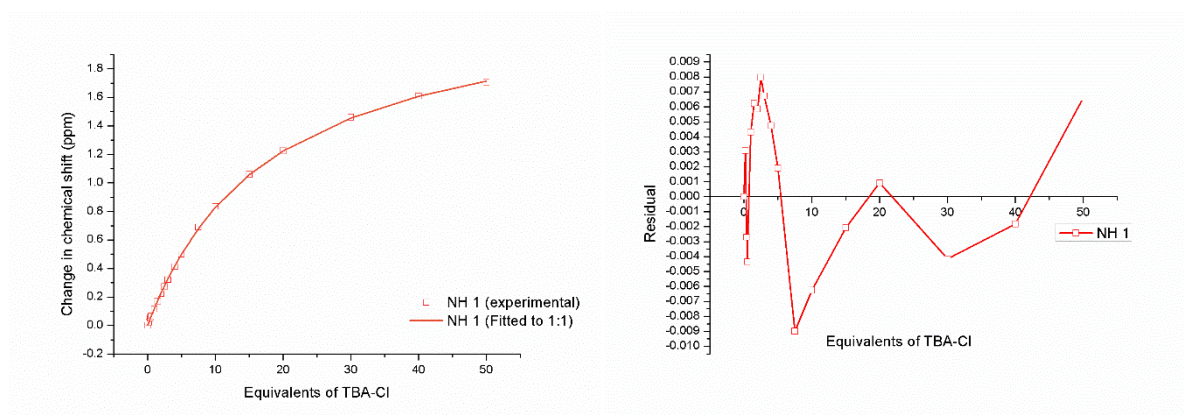

Figure 68. Fitted binding isotherm of 3,6-dioxo-*N*-phenylcyclohexa-1,4-diene-1-carboxamide + TBACl in pure acetonitrile, showing the change in chemical shift of the NH proton fitted to the 1:1 binding model (left).  $K_a = 11.2 \text{ M}^{-1}$  Residual plot showing the random error obtained from the binding isotherm fitting (right). Covariance of fit ( $\text{cov}_{\text{fit}}$ ) =  $7.59 \times 10^{-5}$ . Link to Bindfit fitting: <http://app.supramolecular.org/bindfit/view/0e8c07c2-f323-421f-9064-7fd84b33b6ee>.

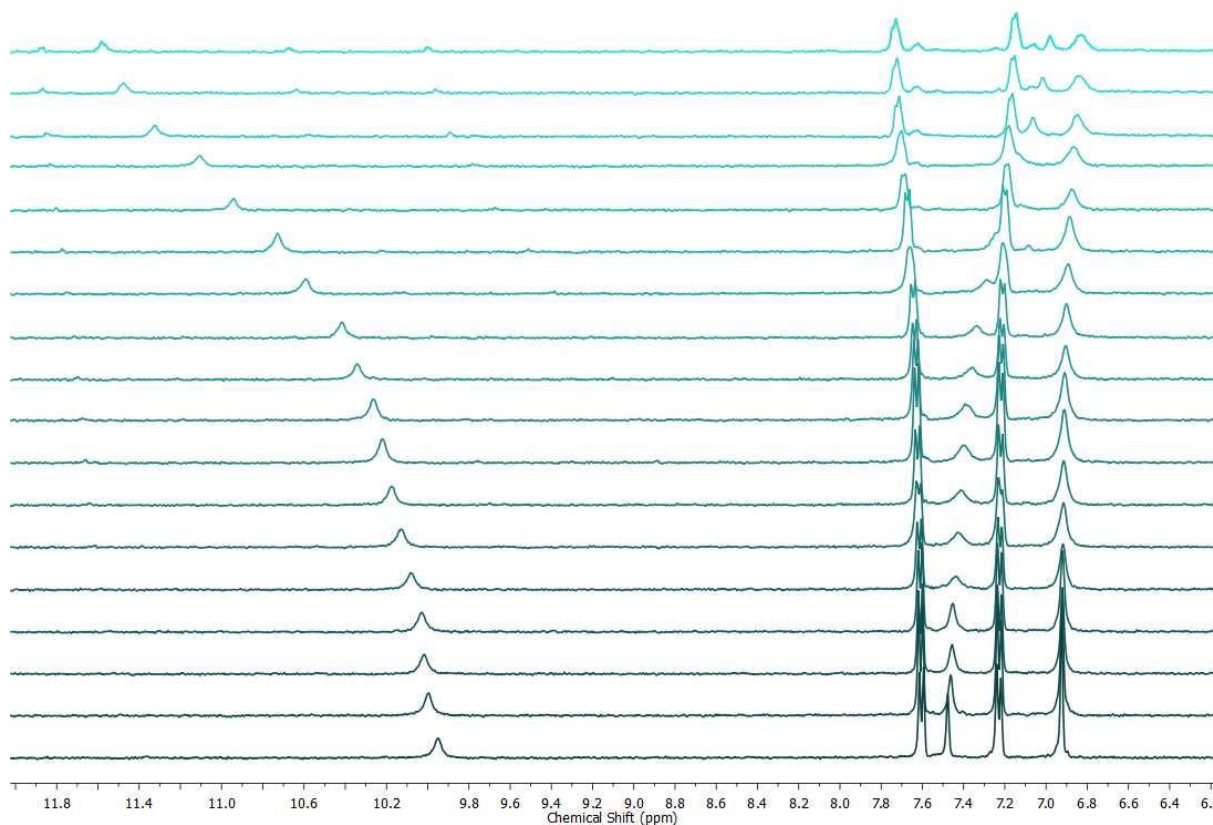

Figure 69.  $^1\text{H}$  NMR titration spectra as a stack plot for 3,6-dioxo-N-(p-tolyl)cyclohexa-1,4-diene-1-carboxamide (5 mM) + TBACl in  $\text{CD}_3\text{CN-d}_3$  at 298 K.

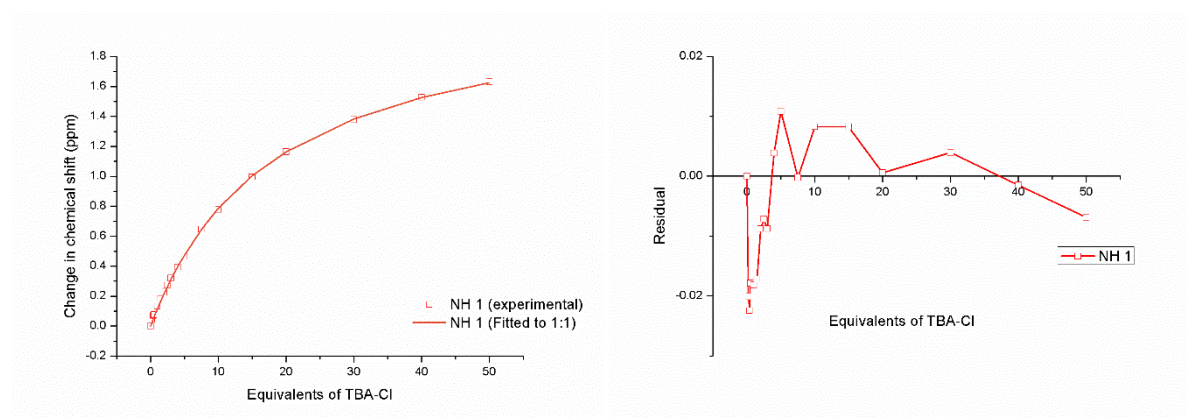

Figure 70. Fitted binding isotherm of 3,6-dioxo-N-(p-tolyl)cyclohexa-1,4-diene-1-carboxamide + TBACl showing the change in chemical shift of the NH proton fitted to the 1:1 binding model (left).  $K_a = 11.39 \text{ M}^{-1}$  Residual plot showing the random error obtained from the binding isotherm fitting (right). Covariance of fit ( $\text{cov}_{\text{fit}}$ ) =  $3.79 \times 10^{-4}$ . Link to Bindfit fitting: <http://app.supramolecular.org/bindfit/view/702ba05b-af22-41f8-92d3-03851c9bbfa4>.

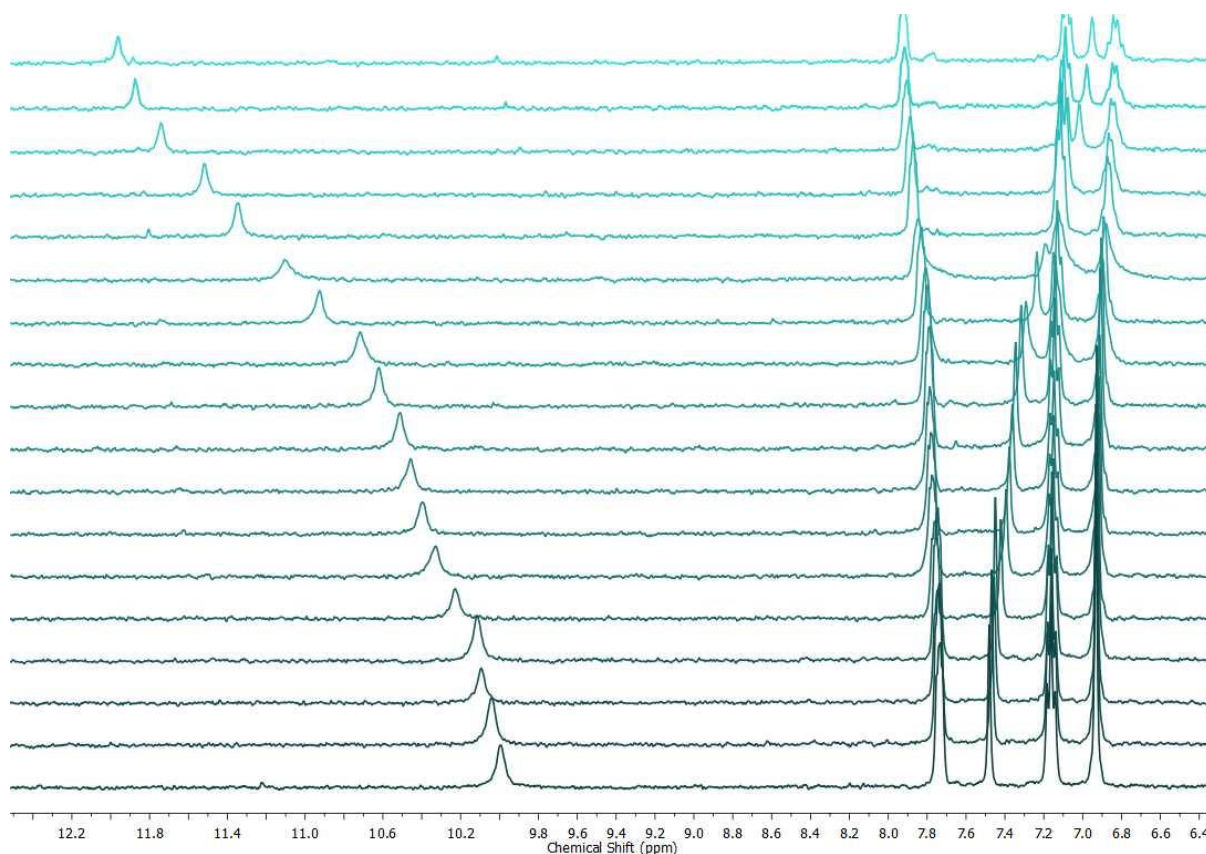

Figure 71.  $^1\text{H}$  NMR titration spectra as a stack plot for *N*-(4-fluorophenyl)-3,6-dioxocyclohexa-1,4-diene-1-carboxamide (5mM) + TBACl in  $\text{CD}_3\text{CN-d}_3$  at 298 K.

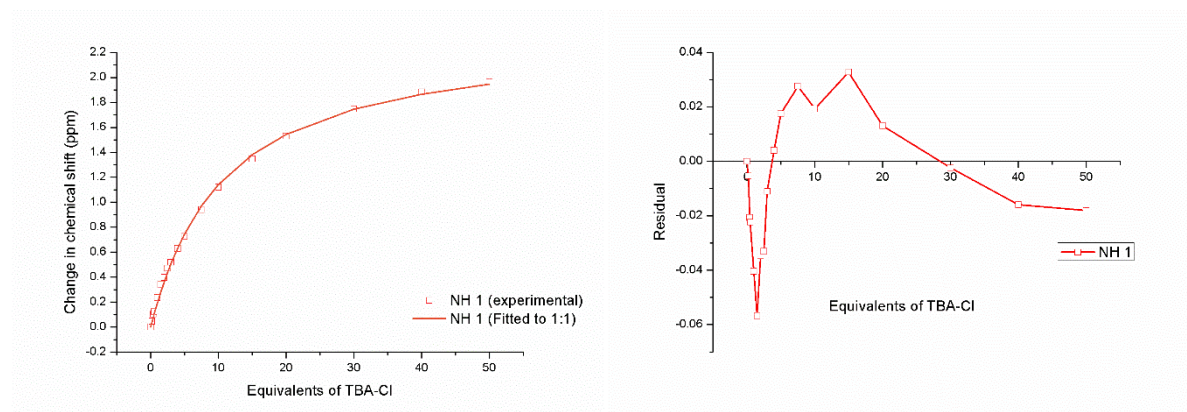

Figure 72. Fitted binding isotherm of *N*-(4-fluorophenyl)-3,6-dioxocyclohexa-1,4-diene-1-carboxamide + TBACl, showing the change in chemical shift of the NH proton fitted to the 1:1 binding model (left).  $K_a = 19.64 \text{ M}^{-1}$  Residual plot showing the random error obtained from the binding isotherm fitting (right). Covariance of fit ( $\text{cov}_{\text{fit}}$ ) =  $1.39 \times 10^{-3}$ . Link to Bindfit fitting: <http://app.supramolecular.org/bindfit/view/c1e8a021-5a3e-449d-9029-c877be8af61f>.

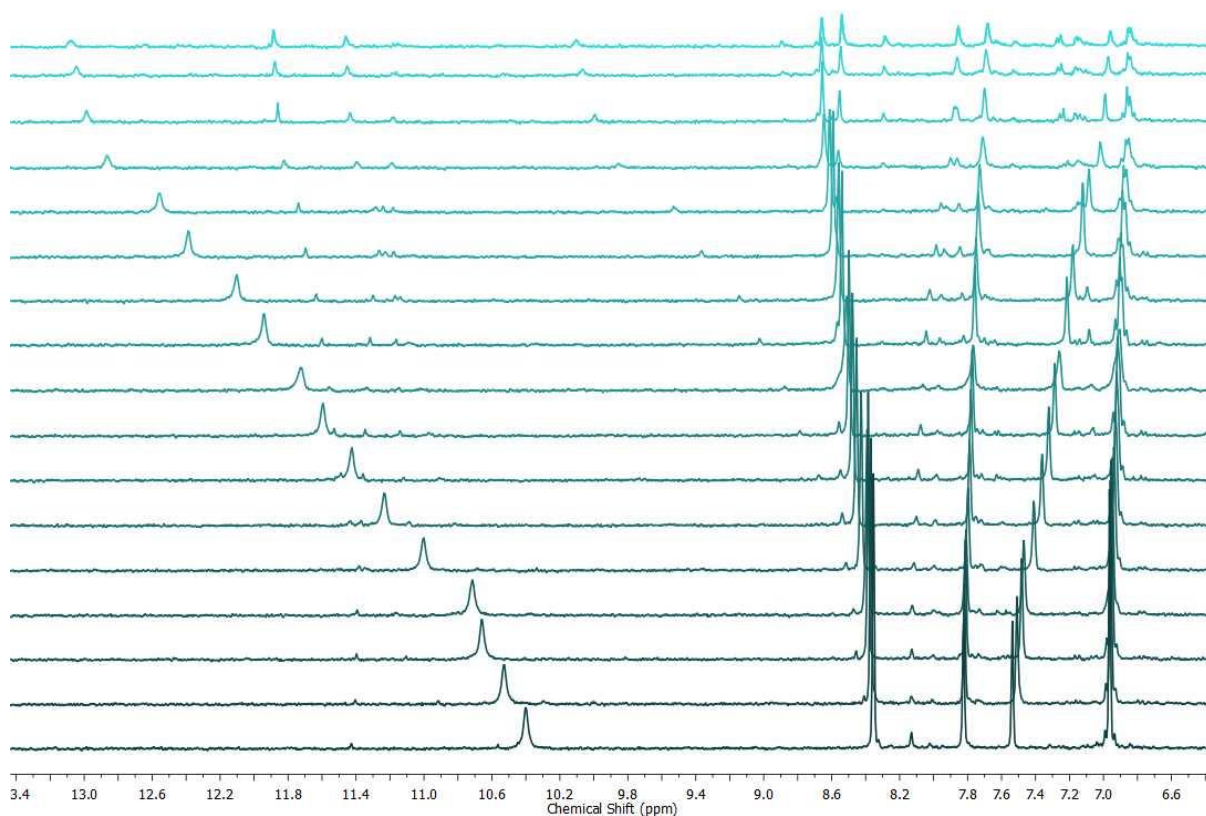

Figure 73.  $^1\text{H}$  NMR titration spectra as a stack plot for *N*-(3,5-bis(trifluoromethyl)phenyl)-3,6-dioxocyclohexa-1,4-diene-1-carboxamide (5mM) + TBACl in  $\text{CD}_3\text{CN-d}_3$  at 298 K.

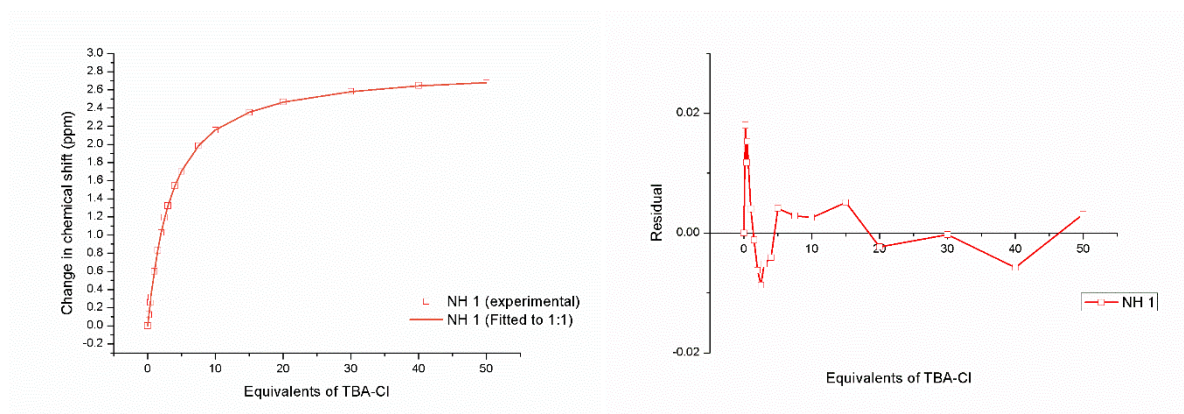

Figure 74. Fitted binding isotherm of *N*-(3,5-bis(trifluoromethyl)phenyl)-3,6-dioxocyclohexa-1,4-diene-1-carboxamide + TBACl showing the change in chemical shift of NH proton fitted to the 1:1 binding model (left).  $K_a = 68.05 \text{ M}^{-1}$  Residual plot showing the random error obtained from the binding isotherm fitting (right). Covariance of fit ( $\text{cov}_{\text{fit}}$ ) =  $8.60 \times 10^{-4}$ . Link to Bindfit fitting: <http://app.supramolecular.org/bindfit/view/e26132bd-3fcb-428f-a064-18bd69f38557>.

## 4. Electrochemical Studies

### Equipment and Procedure

A Basi electrochemical workstation was used for cyclic voltammetry (CV). Initial CV measurements were performed in 0.1 M TBAPF<sub>6</sub>/CH<sub>3</sub>CN solution at a scan rate of 100 mVs<sup>-1</sup> ranging from 800 mV to -1000 mV. All experiments were carried out at room temperature with three electrode system. A 1 mm diameter glassy carbon(GC) electrode was used as working electrode, the Ag/AgCl electrode as pseudoreference electrode, and platinum wire as the auxiliary electrode. Ferrocene was added to the solution and potentials were referenced against the Fc/Fc<sup>+</sup> redox couple.

Scan rate experiments were also undertaken using a Basi electrochemical workstation. Measurements were performed in 0.1 M TBAPF<sub>6</sub> solution and scan rate was varied from 20 mVs<sup>-1</sup> to 300 mVs<sup>-1</sup> between the voltage range of 560 mV to -1000 mV. Voltammograms were recorded for every 20 mVs<sup>-1</sup> in scan rate. A 1 mm diameter glassy carbon(GC) electrode was used as working electrode, the Ag/AgCl electrode as pseudoreference electrode, and platinum wire as the auxiliary electrode. Ferrocene was added to the solution for reference, however only peak current data was used for further analysis.

## Cyclic Voltammograms

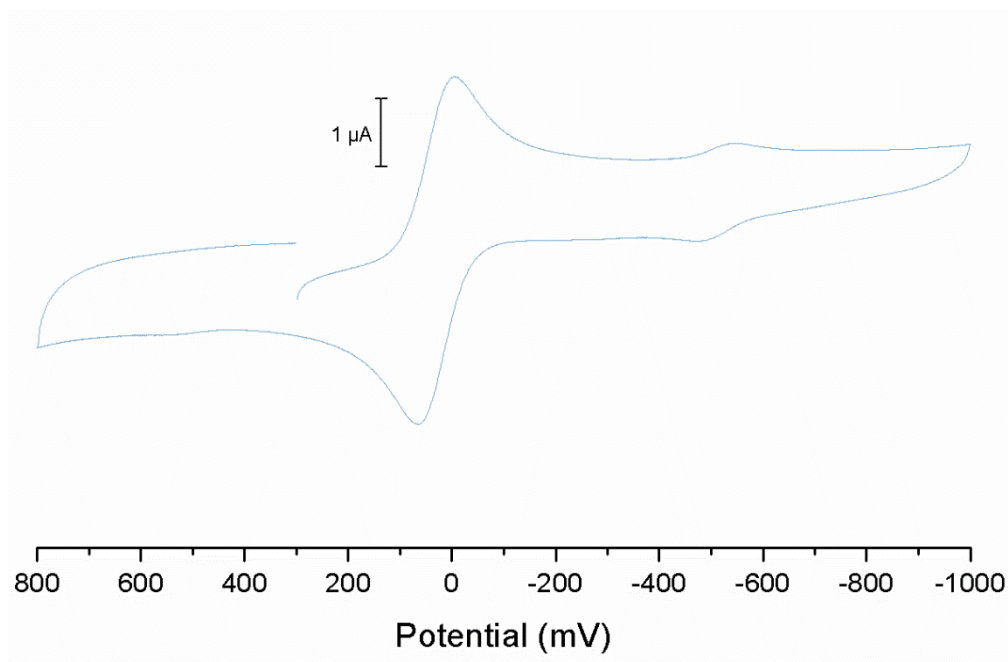

Figure 75. Cyclic Voltammogram of compound **5** 3,6-dioxo-*N*-phenylcyclohexa-1,4-diene-1-carboxamide at  $100 \text{ mVs}^{-1}$  in the presence of  $\text{Fc/Fc}^+$ .

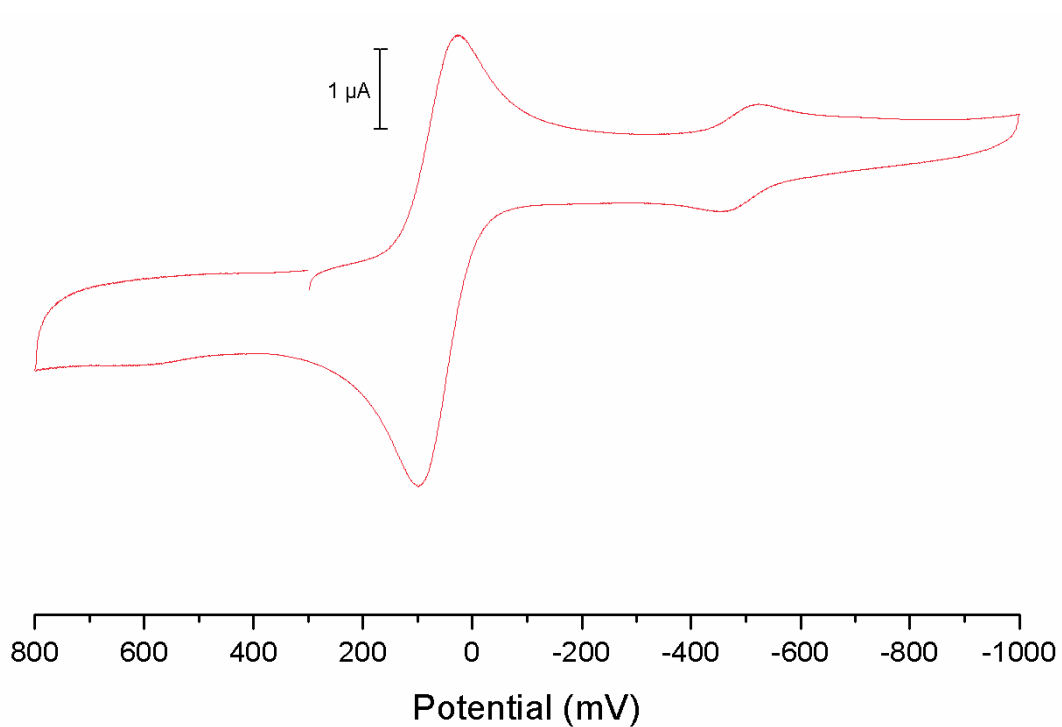

Figure 76. Cyclic Voltammogram of compound **6** 3,6-dioxo-*N*-(*p*-tolyl)cyclohexa-1,4-diene-1-carboxamide at  $100 \text{ mVs}^{-1}$  in the presence of  $\text{Fc/Fc}^+$ .

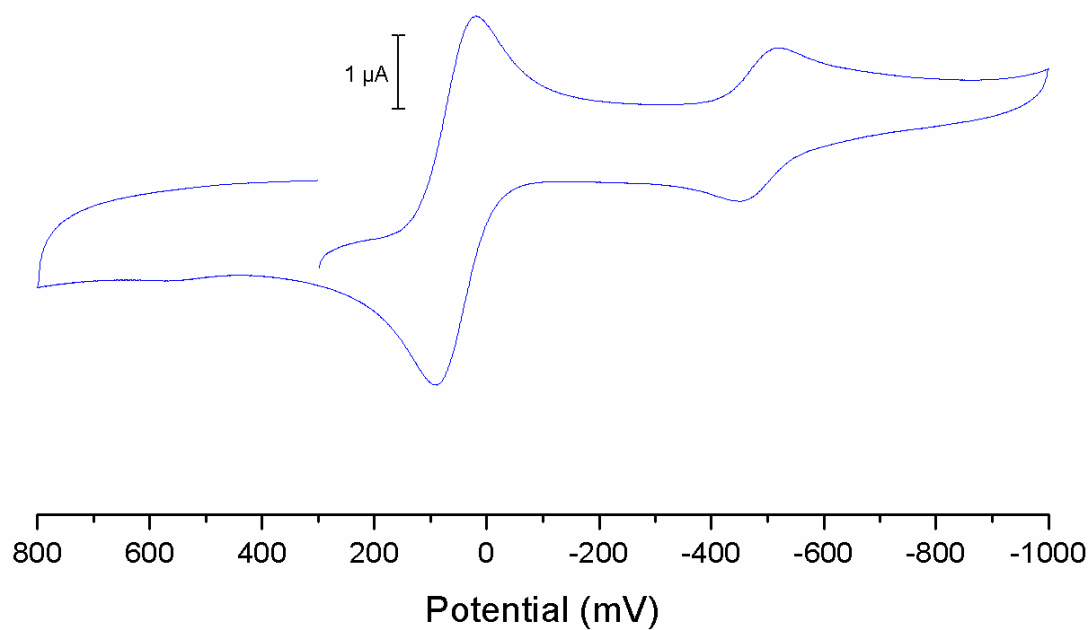

Figure 77. Cyclic Voltammogram of compound **7** *N*-(4-fluorophenyl)-3,6-dioxocyclohexa-1,4-diene-1-carboxamide at 100 mVs<sup>-1</sup> in the presence of Fc/Fc<sup>+</sup>.

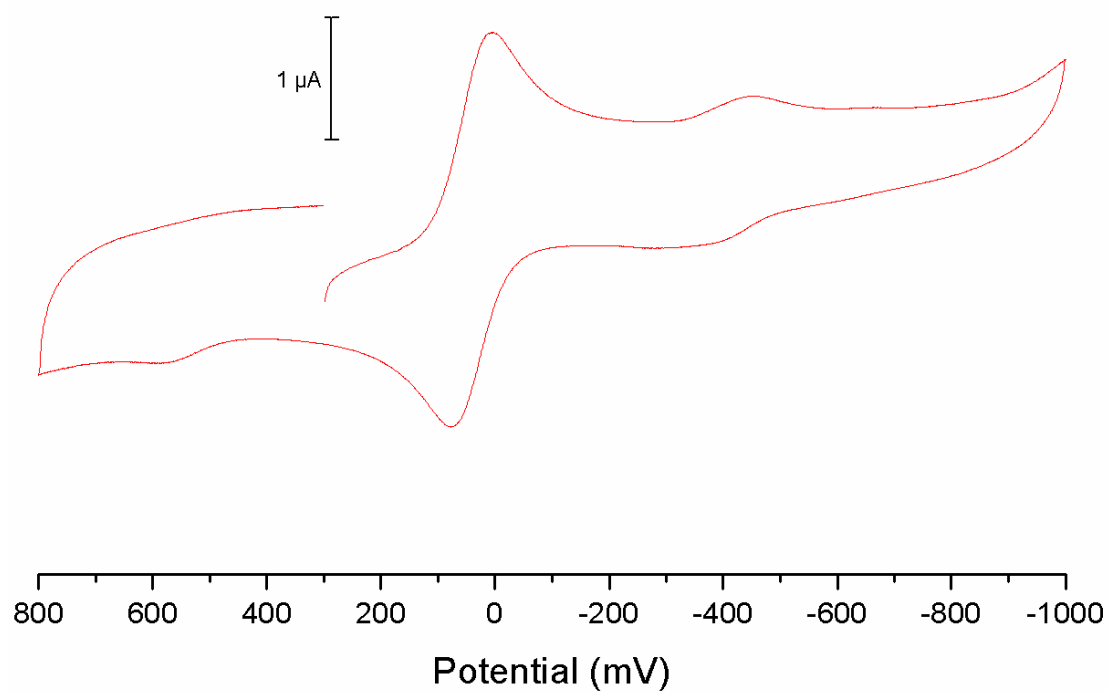

Figure 78. Cyclic Voltammogram of compound **8** *N*-(3,5-bis(trifluoromethyl)phenyl)-3,6-dioxocyclohexa-1,4-diene-1-carboxamide at 100 mVs<sup>-1</sup> in the presence of Fc/Fc<sup>+</sup>.

## Scan Rate Experiments

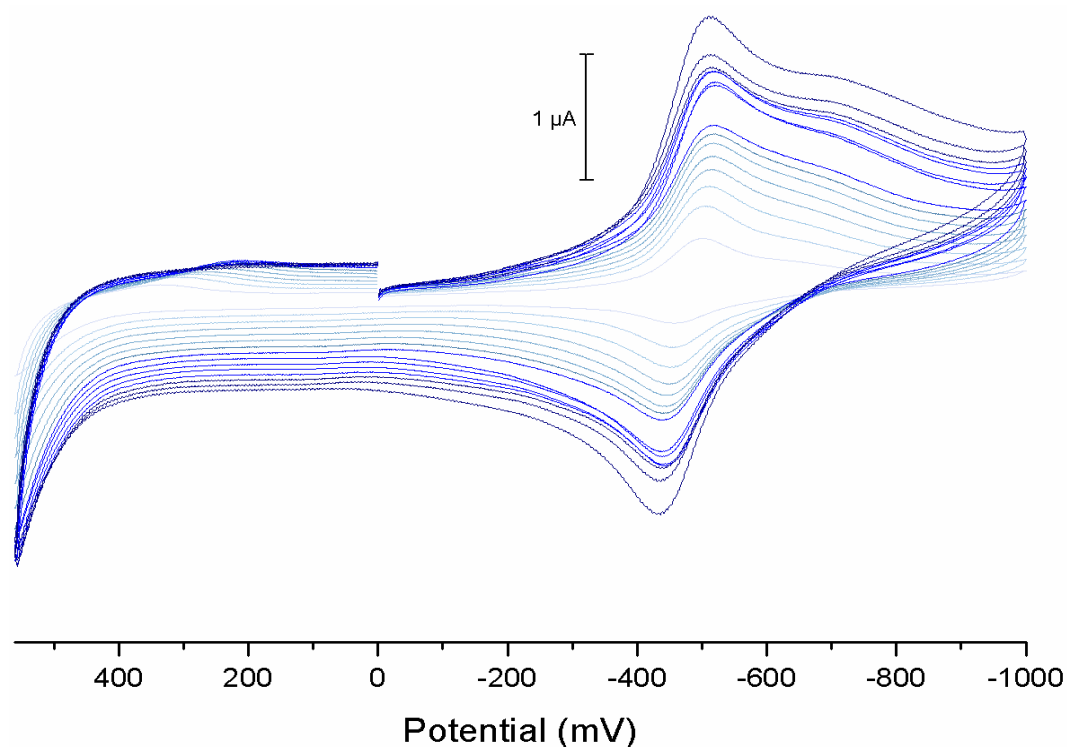

Figure 79. Series of cyclic voltammograms of compound **5** 3,6-dioxo-*N*-phenylcyclohexa-1,4-diene-1-carboxamide taken from scan rate 20  $\text{mVs}^{-1}$  to 300  $\text{mVs}^{-1}$ . The current response increases with faster scan rates.

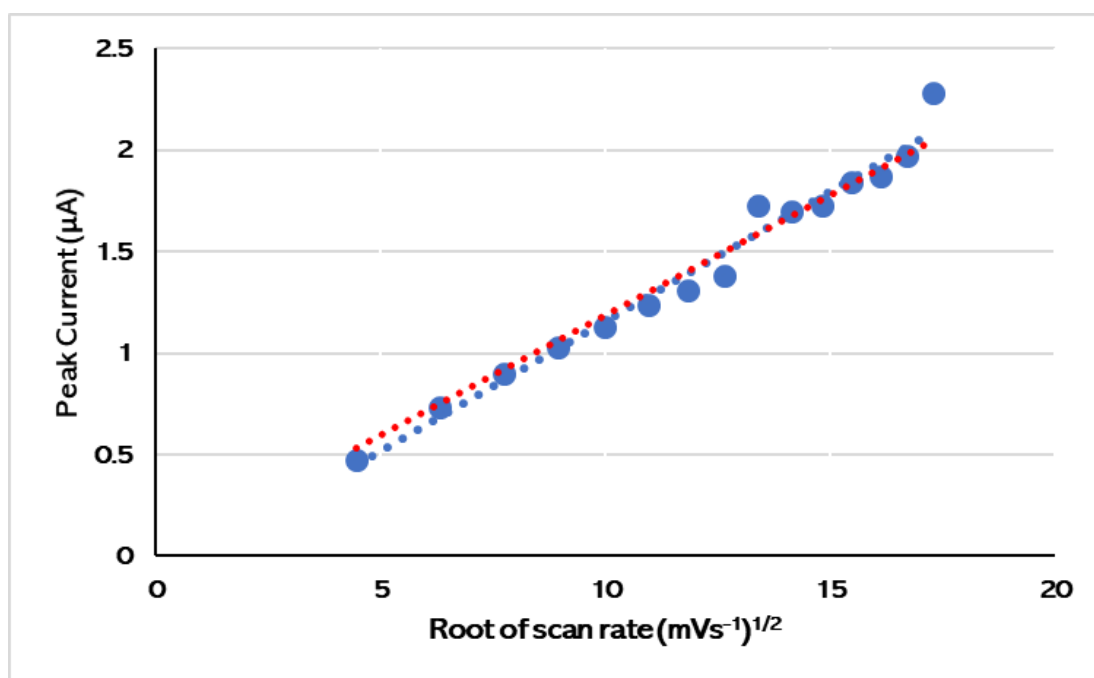

Figure 80. Plot of the root of scan rate ( $\text{v}^{1/2}$ ) against peak current ( $I_{\text{p,c}}$ ) for compound **5** 3,6-dioxo-*N*-phenylcyclohexa-1,4-diene-1-carboxamide. The red line shows the line of best fit through the origin, the blue line shows the true line of best fit.

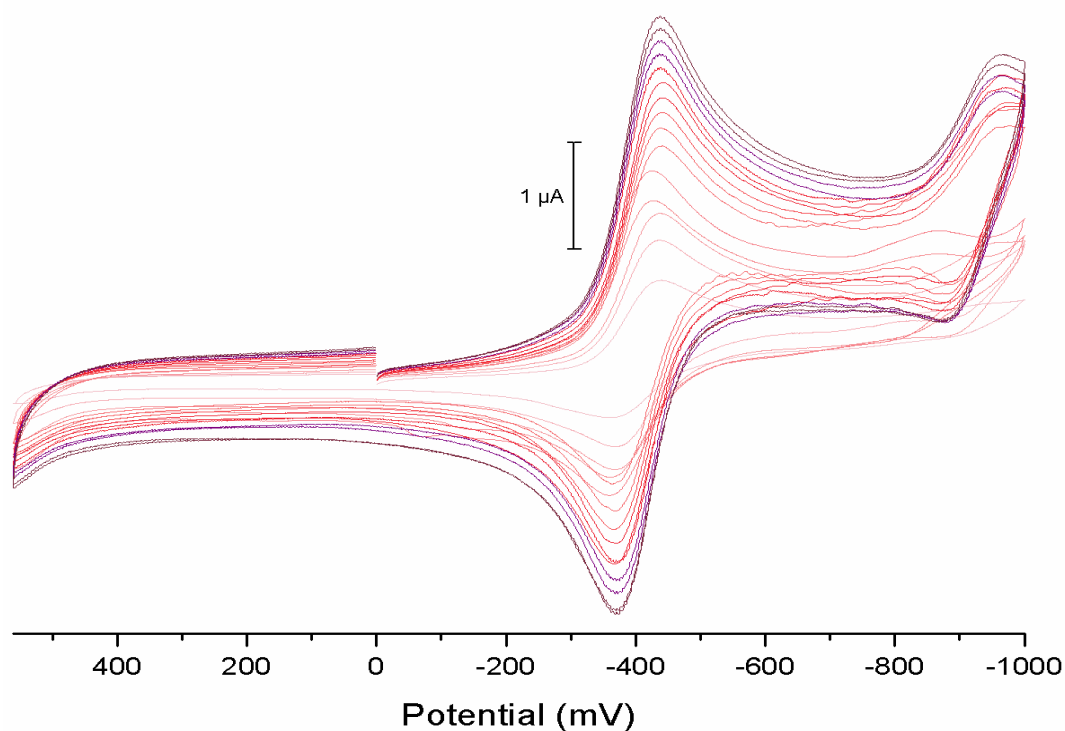

Figure 81. Series of cyclic voltammograms of compound **6** 3,6-dioxo-N-(p-tolyl)cyclohexa-1,4-diene-1-carboxamide taken from scan rate  $20 \text{ mVs}^{-1}$  to  $300 \text{ mVs}^{-1}$ . The current response increases with faster scan rates.

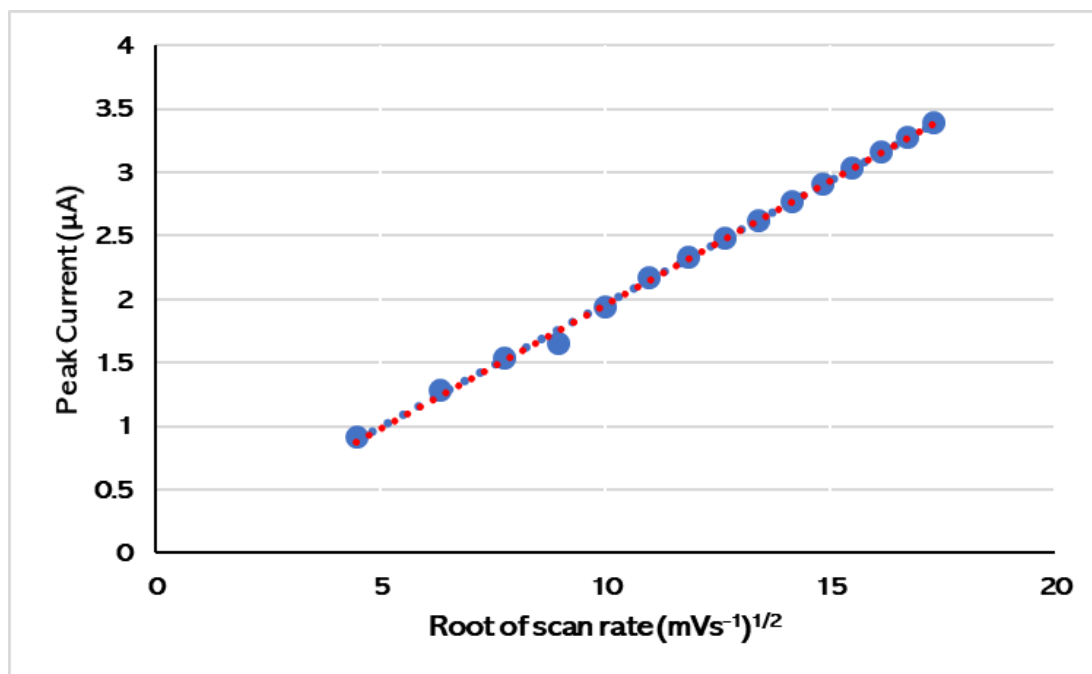

Figure 82. Plot of the root of scan rate ( $v^{1/2}$ ) against peak current ( $I_{p,c}$ ) for compound **6** 3,6-dioxo-N-(p-tolyl)cyclohexa-1,4-diene-1-carboxamide. The red line shows the line of best fit through the origin, the blue line shows the true line of best fit.

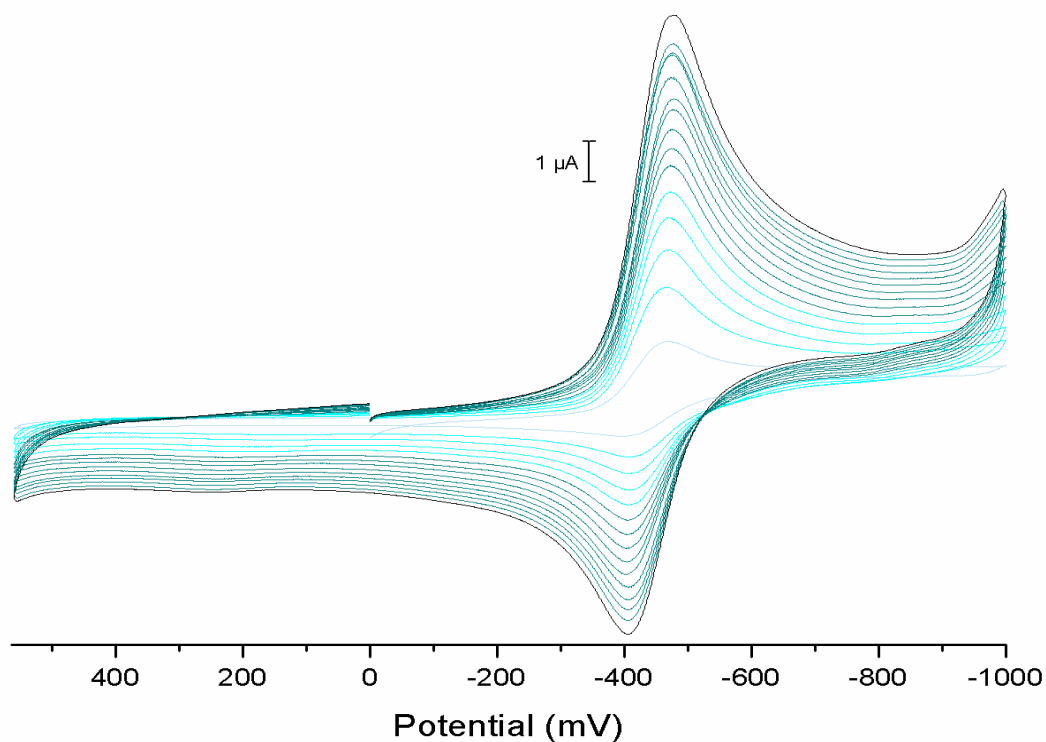

Figure 83. Series of cyclic voltammograms of compound **7** *N*-(4-fluorophenyl)-3,6-dioxocyclohexa-1,4-diene-1-carboxamide taken from scan rate  $20 \text{ mVs}^{-1}$  to  $300 \text{ mVs}^{-1}$ . The current response increases with faster scan rates.

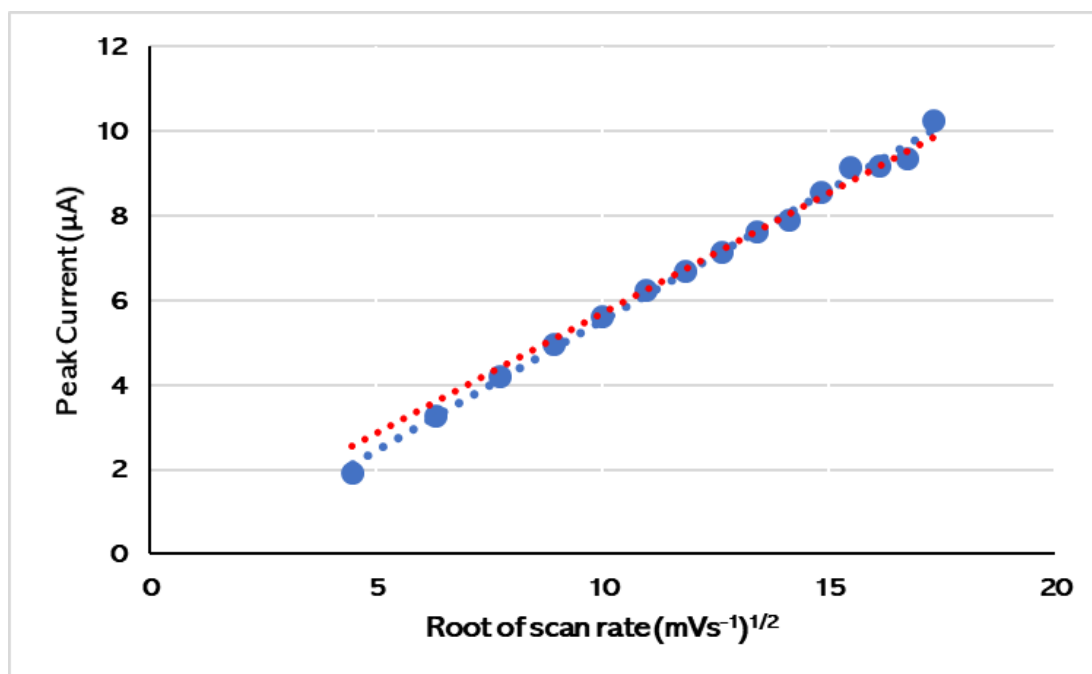

Figure 84. Plot of the root of scan rate ( $v^{1/2}$ ) against peak current ( $I_{p,c}$ ) for **7** *N*-(4-fluorophenyl)-3,6-dioxocyclohexa-1,4-diene-1-carboxamide. The red line shows the line of best fit through the origin, the blue line shows the true line of best fit.

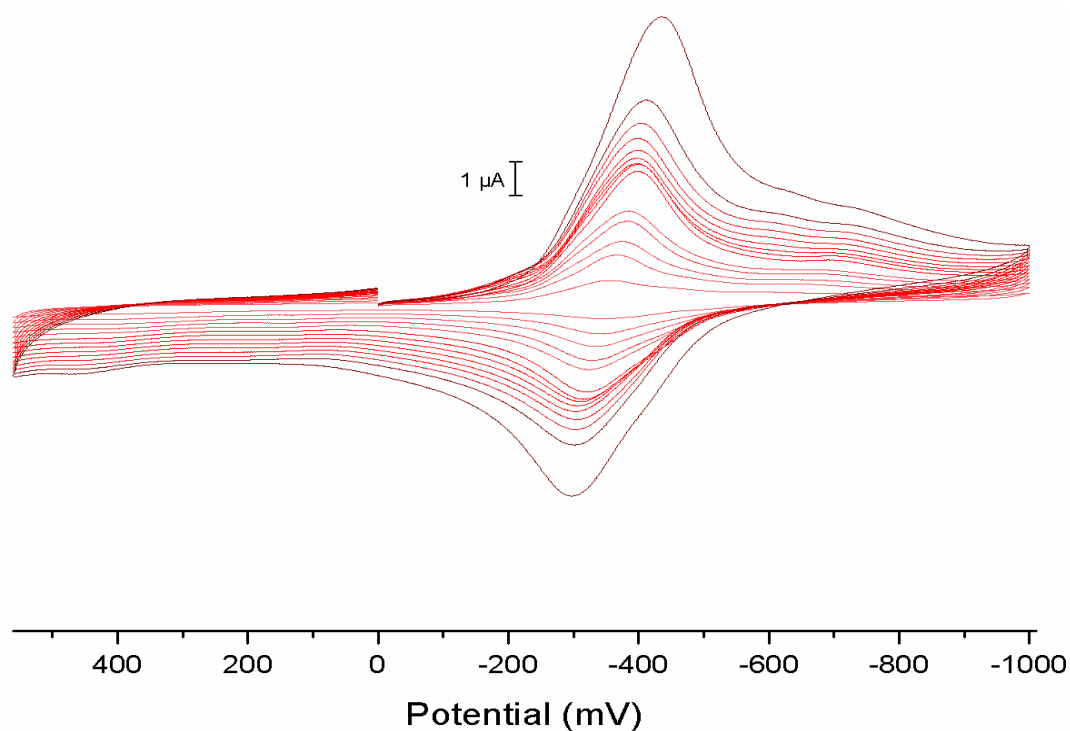

Figure 85. Series of cyclic voltammograms of compound **8** *N*-(3,5-bis(trifluoromethyl)phenyl)-3,6-dioxocyclohexa-1,4-diene-1-carboxamide taken from scan rate  $20 \text{ mVs}^{-1}$  to  $300 \text{ mVs}^{-1}$ . The current response increases with faster scan rates.

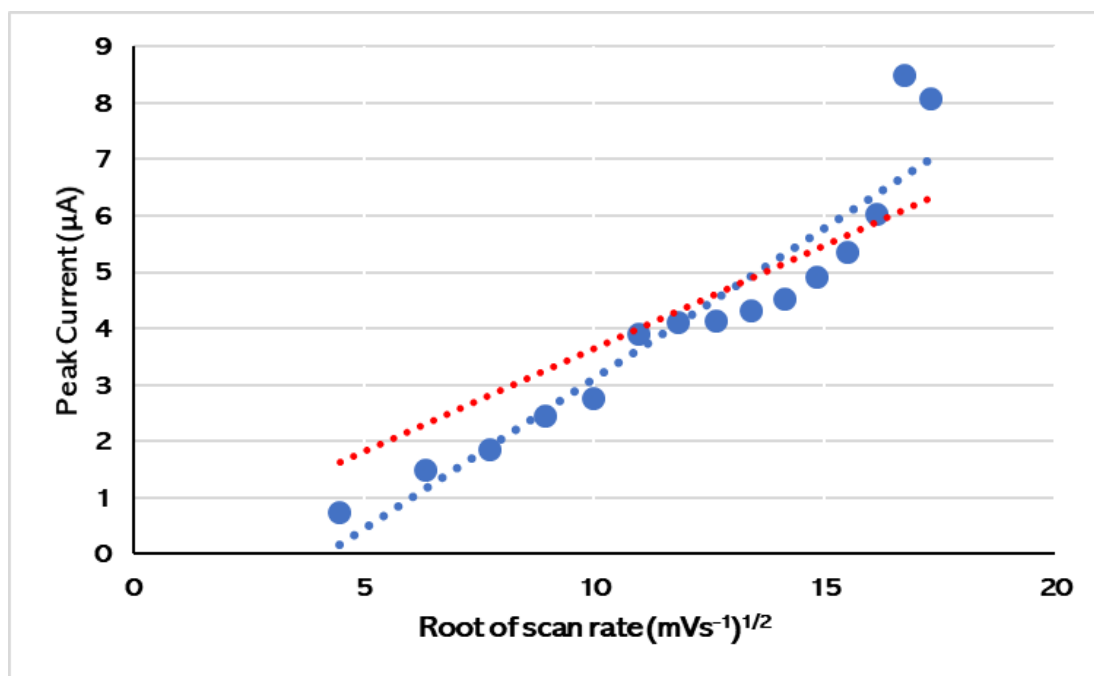

Figure 86. Plot of the root of scan rate ( $v^{1/2}$ ) against peak current ( $I_{p,c}$ ) for **8** *N*-(3,5-bis(trifluoromethyl)phenyl)-3,6-dioxocyclohexa-1,4-diene-1-carboxamide. The red line shows the line of best fit through the origin, the blue line shows the true line of best fit.

## References

1. Wachter, V. Chemical synthesis of small molecule libraries around the p-benzoquinone scaffold 2007.
